# Supplementary material
Source: PubMed Central journal article supplement (PMC3525189)
Supplement: 1479-7364-3-4-349-S1.pdf [file 1479-7364-3-4-349-S1.pdf]

## Supplementary Figure 1: Core set of genes differentially regulated in all the studies

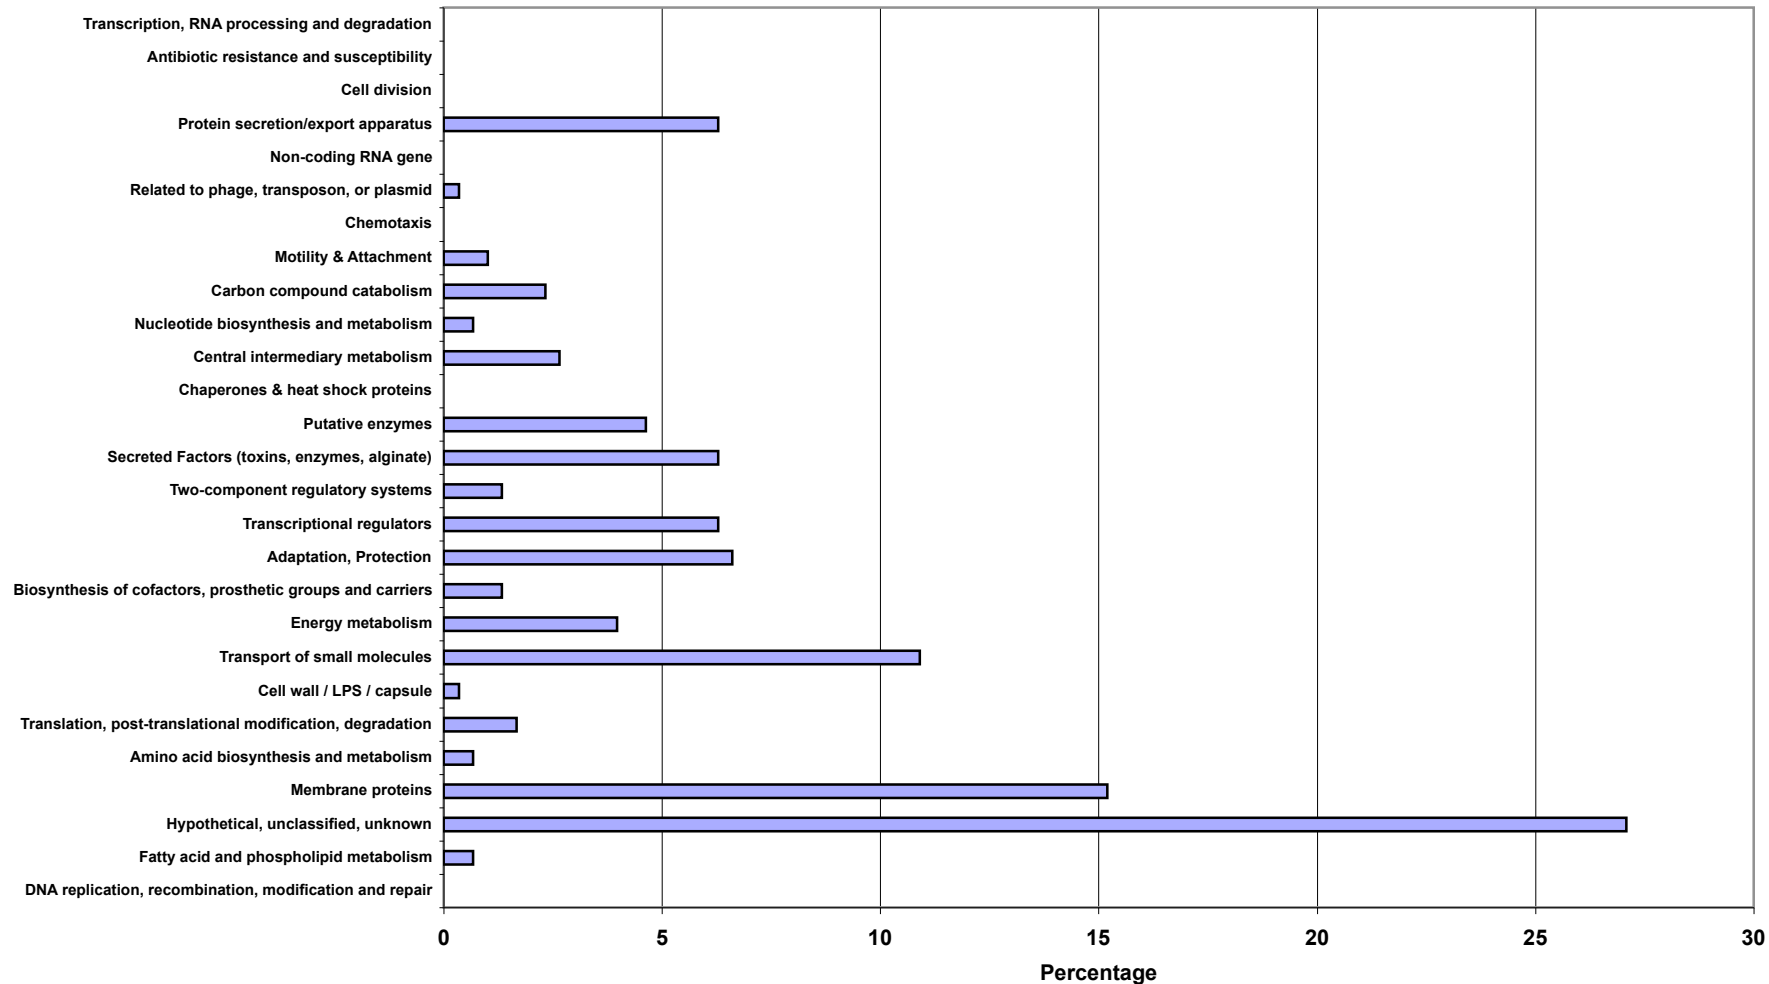

Supplementary Table 1: Comparison of all the genes that are differentially regulated in the 18 transcriptome studies. The list of open reading frames (ORFs) are divided into core and accessory gene set as defined in Mathee *et al.* [PNAS. 2008.105(8). 3100-05].

| ORF                                                                           | Product name                                                   | Function class                                            |
|-------------------------------------------------------------------------------|----------------------------------------------------------------|-----------------------------------------------------------|
| Transcriptional core set ORFs present in the <i>P. aeruginosa</i> core genome |                                                                |                                                           |
| PA0044                                                                        | exoenzyme T                                                    | Secreted Factors (toxins, enzymes, alginate)              |
| PA0045                                                                        | hypothetical protein                                           | Hypothetical, unclassified, unknown                       |
| PA0059                                                                        | osmotically inducible protein OsmC                             | Adaptation, Protection                                    |
| PA0070                                                                        | hypothetical protein                                           | Membrane proteins                                         |
| PA0078                                                                        | hypothetical protein                                           | Hypothetical, unclassified, unknown                       |
| PA0082                                                                        | hypothetical protein                                           | Hypothetical, unclassified, unknown                       |
| PA0084                                                                        | conserved hypothetical protein                                 | Hypothetical, unclassified, unknown                       |
| PA0085                                                                        | conserved hypothetical protein                                 | Hypothetical, unclassified, unknown                       |
| PA0140                                                                        | alkyl hydroperoxide reductase subunit F                        | Adaptation, Protection                                    |
| PA0141                                                                        | conserved hypothetical protein                                 | Hypothetical, unclassified, unknown                       |
| PA0162                                                                        | histidine porin OpcC                                           | Membrane proteins                                         |
| PA0183                                                                        | arylsulfatase                                                  | Central intermediary metabolism                           |
| PA0184                                                                        | probable ATP-binding component of ABC transporter              | Transport of small molecules                              |
| PA0185                                                                        | probable permease of ABC transporter                           | Membrane proteins                                         |
| PA0186                                                                        | probable binding protein component of ABC transporter          | Transport of small molecules                              |
| PA0229                                                                        | dicarboxylic acid transporter PcaT                             | Membrane proteins                                         |
| PA0284                                                                        | hypothetical protein                                           | Hypothetical, unclassified, unknown                       |
| PA0290                                                                        | hypothetical protein                                           | Hypothetical, unclassified, unknown                       |
| PA0291                                                                        | Anaerobically-induced outer membrane porin OprE precursor      | Membrane proteins                                         |
| PA0424                                                                        | multidrug resistance operon repressor MexR                     | Transcriptional regulators                                |
| PA0447                                                                        | glutaryl-CoA dehydrogenase                                     | Fatty acid and phospholipid metabolism                    |
| PA0460                                                                        | hypothetical protein                                           | Hypothetical, unclassified, unknown                       |
| PA0471                                                                        | probable transmembrane sensor                                  | Two-component regulatory systems                          |
| PA0472                                                                        | probable sigma-70 factor, ECF subfamily                        | Transcriptional regulators                                |
| PA0514                                                                        | heme d1 biosynthesis protein NirL                              | Hypothetical, unclassified, unknown                       |
| PA0517                                                                        | probable c-type cytochrome precursor                           | Biosynthesis of cofactors, prosthetic groups and carriers |
| PA0518                                                                        | cytochrome c-551 precursor                                     | Biosynthesis of cofactors, prosthetic groups and carriers |
| PA0519                                                                        | nitrite reductase precursor                                    | Energy metabolism                                         |
| PA0524                                                                        | nitric-oxide reductase subunit B                               | Energy metabolism                                         |
| PA0572                                                                        | hypothetical protein                                           | Hypothetical, unclassified, unknown                       |
| PA0604                                                                        | probable binding protein component of ABC transporter          | Transport of small molecules                              |
| PA0605                                                                        | probable permease of ABC transporter                           | Membrane proteins                                         |
| PA0672                                                                        | heme oxygenase                                                 | Biosynthesis of cofactors, prosthetic groups and carriers |
| PA0688                                                                        | probable binding protein component of ABC transporter          | Transport of small molecules                              |
| PA0762                                                                        | sigma factor AlgU                                              | Transcriptional regulators                                |
| PA0763                                                                        | anti-sigma factor MucA                                         | Transcriptional regulators                                |
| PA0764                                                                        | negative regulator for alginate biosynthesis MucB              | Transcriptional regulators                                |
| PA0775                                                                        | conserved hypothetical protein                                 | Hypothetical, unclassified, unknown                       |
| PA0848                                                                        | probable alkyl hydroperoxide reductase                         | Adaptation, Protection                                    |
| PA0849                                                                        | thioredoxin reductase 2                                        | Nucleotide biosynthesis and metabolism                    |
| PA0852                                                                        | chitin-binding protein CbpD precursor                          | Secreted Factors (toxins, enzymes, alginate)              |
| PA0866                                                                        | aromatic amino acid transport protein AroP2                    | Transport of small molecules                              |
| PA0874                                                                        | hypothetical protein                                           | Hypothetical, unclassified, unknown                       |
| PA0929                                                                        | two-component response regulator                               | Transport of small molecules                              |
| PA0938                                                                        | hypothetical protein                                           | Hypothetical, unclassified, unknown                       |
| PA0958                                                                        | Outer membrane porin OprD precursor                            | Transport of small molecules                              |
| PA0962                                                                        | probable dna-binding stress protein                            | Adaptation, Protection                                    |
| PA1071                                                                        | branched-chain amino acid transport protein BraF               | Transport of small molecules                              |
| PA1156                                                                        | NrdA, catalytic component of class Ia ribonucleotide reductase | Nucleotide biosynthesis and metabolism                    |
| PA1179                                                                        | two-component response regulator PhoP                          | Transcriptional regulators                                |
| PA1180                                                                        | two-component sensor PhoQ                                      | Two-component regulatory systems                          |
| PA1230                                                                        | hypothetical protein                                           | Membrane proteins                                         |
| PA1245                                                                        | hypothetical protein                                           | Membrane proteins                                         |
| PA1246                                                                        | alkaline protease secretion protein AprD                       | Secreted Factors (toxins, enzymes, alginate)              |
| PA1249                                                                        | alkaline metalloproteinase precursor                           | Secreted Factors (toxins, enzymes, alginate)              |

Supplementary Table 1

| ORF    | Product name                                             | Function class                                            |
|--------|----------------------------------------------------------|-----------------------------------------------------------|
| PA1289 | hypothetical protein                                     | Hypothetical, unclassified, unknown                       |
| PA1300 | probable sigma-70 factor, ECF subfamily                  | Transcriptional regulators                                |
| PA1317 | cytochrome o ubiquinol oxidase subunit II                | Energy metabolism                                         |
| PA1318 | cytochrome o ubiquinol oxidase subunit I                 | Energy metabolism                                         |
| PA1319 | cytochrome o ubiquinol oxidase subunit III               | Energy metabolism                                         |
| PA1323 | hypothetical protein                                     | Hypothetical, unclassified, unknown                       |
| PA1324 | hypothetical protein                                     | Hypothetical, unclassified, unknown                       |
| PA1346 | hypothetical protein                                     | Hypothetical, unclassified, unknown                       |
| PA1408 | hypothetical protein                                     | Membrane proteins                                         |
| PA1541 | probable drug efflux transporter                         | Membrane proteins                                         |
| PA1544 | transcriptional regulator Anr                            | Transcriptional regulators                                |
| PA1546 | oxygen-independent coproporphyrinogen III oxidase        | Biosynthesis of cofactors, prosthetic groups and carriers |
| PA1555 | probable cytochrome c                                    | Energy metabolism                                         |
| PA1556 | probable cytochrome c oxidase subunit                    | Energy metabolism                                         |
| PA1557 | probable cytochrome oxidase subunit (cbb3-type)          | Energy metabolism                                         |
| PA1657 | conserved hypothetical protein                           | Hypothetical, unclassified, unknown                       |
| PA1673 | hypothetical protein                                     | Hypothetical, unclassified, unknown                       |
| PA1691 | translocation protein in type III secretion              | Protein secretion/export apparatus                        |
| PA1696 | translocation protein in type III secretion              | Protein secretion/export apparatus                        |
| PA1698 | Type III secretion outer membrane protein PopN precursor | Membrane proteins                                         |
| PA1699 | conserved hypothetical protein in type III secretion     | Protein secretion/export apparatus                        |
| PA1700 | conserved hypothetical protein in type III secretion     | Protein secretion/export apparatus                        |
| PA1701 | conserved hypothetical protein in type III secretion     | Protein secretion/export apparatus                        |
| PA1705 | regulator in type III secretion                          | Protein secretion/export apparatus                        |
| PA1706 | type III secretion protein PcrV                          | Protein secretion/export apparatus                        |
| PA1707 | regulatory protein PcrH                                  | Secreted Factors (toxins, enzymes, alginate)              |
| PA1708 | translocator protein PopB                                | Protein secretion/export apparatus                        |
| PA1709 | Translocator outer membrane protein PopD precursor       | Protein secretion/export apparatus                        |
| PA1710 | ExsC, exoenzyme S synthesis protein C precursor.         | Translation, post-translational modification, degradation |
| PA1711 | ExsE                                                     | Hypothetical, unclassified, unknown                       |
| PA1712 | exoenzyme S synthesis protein B                          | Translation, post-translational modification, degradation |
| PA1713 | transcriptional regulator ExsA                           | Protein secretion/export apparatus                        |
| PA1714 | ExsD                                                     | Hypothetical, unclassified, unknown                       |
| PA1715 | type III export apparatus protein                        | Protein secretion/export apparatus                        |
| PA1716 | Type III secretion outer membrane protein PscC precursor | Protein secretion/export apparatus                        |
| PA1717 | type III export protein PscD                             | Protein secretion/export apparatus                        |
| PA1719 | type III export protein PscF                             | Protein secretion/export apparatus                        |
| PA1720 | type III export protein PscG                             | Protein secretion/export apparatus                        |
| PA1721 | type III export protein PscH                             | Protein secretion/export apparatus                        |
| PA1722 | type III export protein PscI                             | Protein secretion/export apparatus                        |
| PA1723 | type III export protein PscJ                             | Protein secretion/export apparatus                        |
| PA1761 | hypothetical protein                                     | Hypothetical, unclassified, unknown                       |
| PA1793 | peptidyl-prolyl cis-trans isomerase B                    | Translation, post-translational modification, degradation |
| PA1869 | probable acyl carrier protein                            | Fatty acid and phospholipid metabolism                    |
| PA1894 | hypothetical protein                                     | Hypothetical, unclassified, unknown                       |
| PA1902 | phenazine biosynthesis protein PhzD                      | Secreted Factors (toxins, enzymes, alginate)              |
| PA1904 | probable phenazine biosynthesis protein                  | Secreted Factors (toxins, enzymes, alginate)              |
| PA1982 | quinoprotein alcohol dehydrogenase                       | Carbon compound catabolism                                |
| PA2080 | hypothetical protein                                     | Hypothetical, unclassified, unknown                       |
| PA2081 | kynurenine formamidase, KynB                             | Hypothetical, unclassified, unknown                       |
| PA2087 | hypothetical protein                                     | Hypothetical, unclassified, unknown                       |
| PA2088 | hypothetical protein                                     | Hypothetical, unclassified, unknown                       |
| PA2111 | hypothetical protein                                     | Hypothetical, unclassified, unknown                       |
| PA2112 | conserved hypothetical protein                           | Hypothetical, unclassified, unknown                       |
| PA2113 | pyroglutamate porin OpdO                                 | Transport of small molecules                              |
| PA2114 | probable major facilitator superfamily (MFS) transporter | Membrane proteins                                         |
| PA2143 | hypothetical protein                                     | Hypothetical, unclassified, unknown                       |

Supplementary Table 1

| ORF    | Product name                                                   | Function class                               |
|--------|----------------------------------------------------------------|----------------------------------------------|
| PA2146 | conserved hypothetical protein                                 | Hypothetical, unclassified, unknown          |
| PA2158 | probable alcohol dehydrogenase (Zn-dependent)                  | Putative enzymes                             |
| PA2159 | conserved hypothetical protein                                 | Hypothetical, unclassified, unknown          |
| PA2166 | hypothetical protein                                           | Hypothetical, unclassified, unknown          |
| PA2171 | hypothetical protein                                           | Hypothetical, unclassified, unknown          |
| PA2173 | hypothetical protein                                           | Hypothetical, unclassified, unknown          |
| PA2177 | probable sensor/response regulator hybrid                      | Two-component regulatory systems             |
| PA2191 | adenylate cyclase ExoY                                         | Secreted Factors (toxins, enzymes, alginate) |
| PA2193 | hydrogen cyanide synthase HcnA                                 | Central intermediary metabolism              |
| PA2194 | hydrogen cyanide synthase HcnB                                 | Central intermediary metabolism              |
| PA2195 | hydrogen cyanide synthase HcnC                                 | Central intermediary metabolism              |
| PA2247 | 2-oxoisovalerate dehydrogenase (alpha subunit)                 | Amino acid biosynthesis and metabolism       |
| PA2248 | 2-oxoisovalerate dehydrogenase (beta subunit)                  | Amino acid biosynthesis and metabolism       |
| PA2260 | hypothetical protein                                           | Hypothetical, unclassified, unknown          |
| PA2261 | probable 2-ketogluconate kinase                                | Carbon compound catabolism                   |
| PA2262 | probable 2-ketogluconate transporter                           | Membrane proteins                            |
| PA2263 | probable 2-hydroxyacid dehydrogenase                           | Putative enzymes                             |
| PA2264 | conserved hypothetical protein                                 | Hypothetical, unclassified, unknown          |
| PA2265 | gluconate dehydrogenase                                        | Carbon compound catabolism                   |
| PA2266 | probable cytochrome c precursor                                | Carbon compound catabolism                   |
| PA2299 | probable transcriptional regulator                             | Transcriptional regulators                   |
| PA2302 | probable non-ribosomal peptide synthetase                      | Putative enzymes                             |
| PA2304 | hypothetical protein                                           | Hypothetical, unclassified, unknown          |
| PA2305 | probable non-ribosomal peptide synthetase                      | Putative enzymes                             |
| PA2307 | probable permease of ABC transporter                           | Membrane proteins                            |
| PA2309 | hypothetical protein                                           | Hypothetical, unclassified, unknown          |
| PA2310 | hypothetical protein                                           | Putative enzymes                             |
| PA2331 | hypothetical protein                                           | Membrane proteins                            |
| PA2385 | PvdQ                                                           | Adaptation, Protection                       |
| PA2386 | L-ornithine N5-oxygenase                                       | Adaptation, Protection                       |
| PA2389 | conserved hypothetical protein                                 | Hypothetical, unclassified, unknown          |
| PA2392 | PvdP                                                           | Adaptation, Protection                       |
| PA2393 | probable dipeptidase precursor                                 | Central intermediary metabolism              |
| PA2394 | PvdN                                                           | Adaptation, Protection                       |
| PA2396 | pyoverdine synthetase F                                        | Secreted Factors (toxins, enzymes, alginate) |
| PA2397 | pyoverdine biosynthesis protein PvdE                           | Membrane proteins                            |
| PA2403 | hypothetical protein                                           | Membrane proteins                            |
| PA2404 | hypothetical protein                                           | Membrane proteins                            |
| PA2405 | hypothetical protein                                           | Hypothetical, unclassified, unknown          |
| PA2407 | probable adhesion protein                                      | Motility & Attachment                        |
| PA2408 | probable ATP-binding component of ABC transporter              | Transport of small molecules                 |
| PA2409 | probable permease of ABC transporter                           | Membrane proteins                            |
| PA2410 | hypothetical protein                                           | Hypothetical, unclassified, unknown          |
| PA2411 | probable thioesterase                                          | Adaptation, Protection                       |
| PA2412 | conserved hypothetical protein                                 | Hypothetical, unclassified, unknown          |
| PA2413 | L-2,4-diaminobutyrate:2-ketoglutarate 4-aminotransferase, PvdH | Adaptation, Protection                       |
| PA2414 | L-sorbose dehydrogenase                                        | Carbon compound catabolism                   |
| PA2415 | hypothetical protein                                           | Membrane proteins                            |
| PA2424 | PvdL                                                           | Adaptation, Protection                       |
| PA2425 | PvdG                                                           | Adaptation, Protection                       |
| PA2426 | sigma factor PvdS                                              | Transcriptional regulators                   |
| PA2433 | hypothetical protein                                           | Hypothetical, unclassified, unknown          |
| PA2468 | ECF sigma factor FoxI                                          | Transcriptional regulators                   |
| PA2505 | tyrosine porin OpdT                                            | Transport of small molecules                 |
| PA2523 | probable two-component response regulator                      | Transcriptional regulators                   |
| PA2548 | hypothetical protein                                           | Hypothetical, unclassified, unknown          |
| PA2588 | probable transcriptional regulator                             | Transcriptional regulators                   |

Supplementary Table 1

| ORF    | Product name                                                  | Function class                                            |
|--------|---------------------------------------------------------------|-----------------------------------------------------------|
| PA2592 | probable periplasmic spermidine/putrescine-binding protein    | Transport of small molecules                              |
| PA2630 | conserved hypothetical protein                                | Hypothetical, unclassified, unknown                       |
| PA2634 | isocitrate lyase                                              | Putative enzymes                                          |
| PA2687 | two-component sensor PfeS                                     | Two-component regulatory systems                          |
| PA2747 | hypothetical protein                                          | Hypothetical, unclassified, unknown                       |
| PA2760 | probable outer membrane protein precursor                     | Transport of small molecules                              |
| PA2808 | two-component response repressor, PtrA                        | Transcriptional regulators                                |
| PA2850 | organic hydroperoxide resistance protein                      | Adaptation, Protection                                    |
| PA2896 | probable sigma-70 factor, ECF subfamily                       | Transcriptional regulators                                |
| PA3235 | conserved hypothetical protein                                | Membrane proteins                                         |
| PA3278 | hypothetical protein                                          | Membrane proteins                                         |
| PA3281 | hypothetical protein                                          | Membrane proteins                                         |
| PA3283 | conserved hypothetical protein                                | Hypothetical, unclassified, unknown                       |
| PA3284 | hypothetical protein                                          | Hypothetical, unclassified, unknown                       |
| PA3287 | conserved hypothetical protein                                | Hypothetical, unclassified, unknown                       |
| PA3328 | probable FAD-dependent monooxygenase                          | Putative enzymes                                          |
| PA3369 | hypothetical protein                                          | Membrane proteins                                         |
| PA3371 | hypothetical protein                                          | Hypothetical, unclassified, unknown                       |
| PA3413 | conserved hypothetical protein                                | Hypothetical, unclassified, unknown                       |
| PA3414 | hypothetical protein                                          | Hypothetical, unclassified, unknown                       |
| PA3416 | probable pyruvate dehydrogenase E1 component, beta chain      | Energy metabolism                                         |
| PA3446 | conserved hypothetical protein                                | Hypothetical, unclassified, unknown                       |
| PA3447 | probable ATP-binding component of ABC transporter             | Transport of small molecules                              |
| PA3448 | probable permease of ABC transporter                          | Membrane proteins                                         |
| PA3450 | probable antioxidant protein                                  | Adaptation, Protection                                    |
| PA3460 | probable acetyltransferase                                    | Putative enzymes                                          |
| PA3461 | conserved hypothetical protein                                | Hypothetical, unclassified, unknown                       |
| PA3515 | hypothetical protein                                          | Hypothetical, unclassified, unknown                       |
| PA3516 | probable lyase                                                | Putative enzymes                                          |
| PA3517 | probable lyase                                                | Carbon compound catabolism                                |
| PA3518 | hypothetical protein                                          | Hypothetical, unclassified, unknown                       |
| PA3519 | hypothetical protein                                          | Hypothetical, unclassified, unknown                       |
| PA3520 | hypothetical protein                                          | Hypothetical, unclassified, unknown                       |
| PA3523 | probable RND efflux membrane fusion protein precursor         | Transport of small molecules                              |
| PA3531 | bacterioferritin                                              | Transport of small molecules                              |
| PA3573 | probable major facilitator superfamily (MFS) transporter      | Adaptation, Protection                                    |
| PA3600 | conserved hypothetical protein                                | Translation, post-translational modification, degradation |
| PA3690 | probable metal-transporting P-type ATPase                     | Membrane proteins                                         |
| PA3691 | hypothetical protein                                          | Hypothetical, unclassified, unknown                       |
| PA3709 | probable major facilitator superfamily (MFS) transporter      | Membrane proteins                                         |
| PA3790 | Putative copper transport outer membrane porin OprC precursor | Transport of small molecules                              |
| PA3842 | probable chaperone                                            | Secreted Factors (toxins, enzymes, alginate)              |
| PA3899 | probable sigma-70 factor, ECF subfamily                       | Transcriptional regulators                                |
| PA3900 | probable transmembrane sensor                                 | Membrane proteins                                         |
| PA3904 | hypothetical protein                                          | Hypothetical, unclassified, unknown                       |
| PA3936 | probable permease of ABC taurine transporter                  | Membrane proteins                                         |
| PA3937 | probable ATP-binding component of ABC taurine transporter     | Transport of small molecules                              |
| PA3938 | probable periplasmic taurine-binding protein precursor        | Transport of small molecules                              |
| PA3954 | hypothetical protein                                          | Hypothetical, unclassified, unknown                       |
| PA4067 | Outer membrane protein OprG precursor                         | Membrane proteins                                         |
| PA4139 | hypothetical protein                                          | Hypothetical, unclassified, unknown                       |
| PA4156 | probable TonB-dependent receptor                              | Transport of small molecules                              |
| PA4168 | second ferric pyoverdine receptor FpvB                        | Transport of small molecules                              |
| PA4171 | probable protease                                             | Putative enzymes                                          |
| PA4179 | probable porin                                                | Membrane proteins                                         |
| PA4217 | flavin-containing monooxygenase                               | Putative enzymes                                          |
| PA4218 | probable transporter                                          | Membrane proteins                                         |

Supplementary Table 1

| ORF    | Product name                                                   | Function class                                            |
|--------|----------------------------------------------------------------|-----------------------------------------------------------|
| PA4219 | hypothetical protein                                           | Membrane proteins                                         |
| PA4220 | hypothetical protein                                           | Hypothetical, unclassified, unknown                       |
| PA4221 | Fe(III)-pyochelin outer membrane receptor precursor            | Transport of small molecules                              |
| PA4222 | probable ATP-binding component of ABC transporter              | Transport of small molecules                              |
| PA4224 | pyochelin biosynthetic protein PchG                            | Transport of small molecules                              |
| PA4225 | pyochelin synthetase                                           | Secreted Factors (toxins, enzymes, alginate)              |
| PA4226 | dihydroaeruginic acid synthetase                               | Secreted Factors (toxins, enzymes, alginate)              |
| PA4227 | transcriptional regulator PchR                                 | Transcriptional regulators                                |
| PA4228 | pyochelin biosynthesis protein PchD                            | Secreted Factors (toxins, enzymes, alginate)              |
| PA4229 | pyochelin biosynthetic protein PchC                            | Secreted Factors (toxins, enzymes, alginate)              |
| PA4230 | salicylate biosynthesis protein PchB                           | Secreted Factors (toxins, enzymes, alginate)              |
| PA4231 | salicylate biosynthesis isochorismate synthase                 | Secreted Factors (toxins, enzymes, alginate)              |
| PA4296 | two-component response regulator, PprB                         | Transcriptional regulators                                |
| PA4359 | conserved hypothetical protein                                 | Hypothetical, unclassified, unknown                       |
| PA4429 | probable cytochrome c1 precursor                               | Energy metabolism                                         |
| PA4430 | probable cytochrome b                                          | Energy metabolism                                         |
| PA4431 | probable iron-sulfur protein                                   | Putative enzymes                                          |
| PA4467 | hypothetical protein                                           | Membrane proteins                                         |
| PA4468 | superoxide dismutase                                           | Adaptation, Protection                                    |
| PA4469 | hypothetical protein                                           | Hypothetical, unclassified, unknown                       |
| PA4470 | fumarate hydratase                                             | Energy metabolism                                         |
| PA4471 | hypothetical protein                                           | Hypothetical, unclassified, unknown                       |
| PA4480 | rod shape-determining protein MreC                             | Cell wall / LPS / capsule                                 |
| PA4501 | Glycine-glutamate dipeptide porin OpdP                         | Transport of small molecules                              |
| PA4563 | 30S ribosomal protein S20                                      | Central intermediary metabolism                           |
| PA4570 | hypothetical protein                                           | Hypothetical, unclassified, unknown                       |
| PA4590 | protein activator                                              | Transport of small molecules                              |
| PA4613 | catalase                                                       | Adaptation, Protection                                    |
| PA4670 | ribose-phosphate pyrophosphokinase                             | Carbon compound catabolism                                |
| PA4673 | conserved hypothetical protein                                 | Hypothetical, unclassified, unknown                       |
| PA4708 | Heme-transport protein, PhuT                                   | Transport of small molecules                              |
| PA4709 | probable hemin degrading factor                                | Putative enzymes                                          |
| PA4710 | Haem/Haemoglobin uptake outer membrane receptor PhuR precursor | Transport of small molecules                              |
| PA4719 | probable transporter                                           | Membrane proteins                                         |
| PA4738 | conserved hypothetical protein                                 | Hypothetical, unclassified, unknown                       |
| PA4739 | conserved hypothetical protein                                 | Hypothetical, unclassified, unknown                       |
| PA4876 | osmotically inducible lipoprotein OsmE                         | Membrane proteins                                         |
| PA4880 | probable bacterioferritin                                      | Central intermediary metabolism                           |
| PA4896 | probable sigma-70 factor, ECF subfamily                        | Transcriptional regulators                                |
| PA4909 | probable ATP-binding component of ABC transporter              | Transport of small molecules                              |
| PA4981 | probable amino acid permease                                   | Membrane proteins                                         |
| PA5261 | alginate biosynthesis regulatory protein AlgR                  | Secreted Factors (toxins, enzymes, alginate)              |
| PA5311 | probable major facilitator superfamily (MFS) transporter       | Membrane proteins                                         |
| PA5315 | 50S ribosomal protein L33                                      | Translation, post-translational modification, degradation |
| PA5407 | hypothetical protein                                           | Hypothetical, unclassified, unknown                       |
| PA5469 | conserved hypothetical protein                                 | Membrane proteins                                         |
| PA5482 | hypothetical protein                                           | Membrane proteins                                         |
| PA5530 | probable MFS dicarboxylate transporter                         | Membrane proteins                                         |

#### Transcriptional core set ORFs present in the *P. aeruginosa* PAO1 accessory genome

|        |                                                       |                                          |
|--------|-------------------------------------------------------|------------------------------------------|
| PA0203 | probable binding protein component of ABC transporter | Transport of small molecules             |
| PA0204 | probable permease of ABC transporter                  | Membrane proteins                        |
| PA0205 | probable permease of ABC transporter                  | Membrane proteins                        |
| PA0206 | probable ATP-binding component of ABC transporter     | Transport of small molecules             |
| PA0633 | hypothetical protein                                  | Related to phage, transposon, or plasmid |
| PA0691 | hypothetical protein                                  | Hypothetical, unclassified, unknown      |

Supplementary Table 1

| <b>ORF</b> | <b>Product name</b>                               | <b>Function class</b>                        |
|------------|---------------------------------------------------|----------------------------------------------|
| PA1414     | hypothetical protein                              | Hypothetical, unclassified, unknown          |
| PA1592     | hypothetical protein                              | Hypothetical, unclassified, unknown          |
| PA1718     | type III export protein PscE                      | Protein secretion/export apparatus           |
| PA2033     | hypothetical protein                              | Hypothetical, unclassified, unknown          |
| PA2034     | hypothetical protein                              | Hypothetical, unclassified, unknown          |
| PA2184     | conserved hypothetical protein                    | Hypothetical, unclassified, unknown          |
| PA2190     | conserved hypothetical protein                    | Hypothetical, unclassified, unknown          |
| PA2308     | probable ATP-binding component of ABC transporter | Transport of small molecules                 |
| PA2398     | ferripyoverdine receptor                          | Transport of small molecules                 |
| PA2399     | pyoverdine synthetase D                           | Secreted Factors (toxins, enzymes, alginate) |
| PA2400     | PvdJ                                              | Adaptation, Protection                       |
| PA2402     | probable non-ribosomal peptide synthetase         | Putative enzymes                             |
| PA2452     | hypothetical protein                              | Hypothetical, unclassified, unknown          |
| PA3370     | hypothetical protein                              | Membrane proteins                            |
| PA3477     | transcriptional regulator RhIR                    | Adaptation, Protection                       |
| PA3841     | exoenzyme S                                       | Secreted Factors (toxins, enzymes, alginate) |
| PA3866     | pyocin protein                                    | Adaptation, Protection                       |
| PA3923     | hypothetical protein                              | Hypothetical, unclassified, unknown          |
| PA4193     | probable permease of ABC transporter              | Membrane proteins                            |
| PA4223     | probable ATP-binding component of ABC transporter | Membrane proteins                            |
| PA4306     | Type IVb pilin, Flp                               | Motility & Attachment                        |
| PA4555     | type 4 fimbrial biogenesis protein PilY2          | Motility & Attachment                        |
| PA4748     | triosephosphate isomerase                         | Central intermediary metabolism              |

Supplementary Table 2: Functional categorization of genes that are uniquely expressed under the different study conditions.

| Code      | Class                                                     | Percentage of differentially regulated unique genes (minus the core set) |    |             |     |        |         |         |          |      |         |
|-----------|-----------------------------------------------------------|--------------------------------------------------------------------------|----|-------------|-----|--------|---------|---------|----------|------|---------|
|           |                                                           | Iron                                                                     | QS | Oxi. Stress | PCP | Copper | Sulfate | Osmotic | Biofilms | RsmA | Total % |
| <b>a</b>  | DNA replication, recombination, modification and repair   | 0                                                                        | 1  | 1           | 0   | 0      | 0       | 0       | 0        | 0    | 0.4     |
| <b>b</b>  | Fatty acid and phospholipid metabolism                    | 0                                                                        | 2  | 0           | 1   | 0      | 0       | 0       | 2        | 1    | 1.2     |
| <b>c</b>  | Hypothetical, unclassified, unknown                       | 27                                                                       | 32 | 26          | 31  | 14     | 14      | 3       | 40       | 1    | 29.7    |
| <b>d</b>  | Membrane proteins                                         | 22                                                                       | 12 | 8           | 11  | 33     | 14      | 0       | 12       | 8    | 13.3    |
| <b>e</b>  | Amino acid biosynthesis and metabolism                    | 3                                                                        | 3  | 2           | 4   | 0      | 0       | 3       | 2        | 6    | 2.5     |
| <b>f</b>  | Translation, post-translational modification, degradation | 1                                                                        | 1  | 3           | 5   | 2      | 0       | 3       | 4        | 1    | 2.4     |
| <b>g</b>  | Cell wall / LPS / capsule                                 | 1                                                                        | 1  | 1           | 3   | 0      | 0       | 0       | 5        | 6    | 2.2     |
| <b>h</b>  | Transport of small molecules                              | 10                                                                       | 7  | 9           | 12  | 19     | 17      | 0       | 4        | 8    | 7.7     |
| <b>i</b>  | Energy metabolism                                         | 4                                                                        | 3  | 15          | 3   | 7      | 3       | 0       | 3        | 7    | 5.1     |
| <b>j</b>  | Biosynthesis of cofactors, prosthetic groups and carriers | 4                                                                        | 2  | 2           | 3   | 1      | 0       | 0       | 0        | 3    | 1.7     |
| <b>k</b>  | Adaptation, Protection                                    | 3                                                                        | 2  | 4           | 0   | 5      | 0       | 3       | 3        | 14   | 3.1     |
| <b>l</b>  | Transcriptional regulators                                | 7                                                                        | 6  | 3           | 7   | 10     | 3       | 37      | 5        | 3    | 5.8     |
| <b>m</b>  | Two-component regulatory systems                          | 1                                                                        | 1  | 0           | 0   | 4      | 0       | 10      | 2        | 1    | 1.1     |
| <b>n</b>  | Secreted Factors (toxins, enzymes, alginate)              | 7                                                                        | 2  | 0           | 1   | 1      | 0       | 0       | 1        | 7    | 2.2     |
| <b>o</b>  | Putative enzymes                                          | 7                                                                        | 10 | 7           | 9   | 3      | 34      | 3       | 7        | 0    | 8.0     |
| <b>p</b>  | Chaperones & heat shock proteins                          | 1                                                                        | 0  | 0           | 1   | 0      | 0       | 0       | 0        | 0    | 0.2     |
| <b>q</b>  | Central intermediary metabolism                           | 1                                                                        | 3  | 3           | 4   | 0      | 0       | 0       | 1        | 0    | 2.1     |
| <b>r</b>  | Nucleotide biosynthesis and metabolism                    | 0                                                                        | 1  | 0           | 0   | 0      | 14      | 0       | 1        | 1    | 0.7     |
| <b>s</b>  | Carbon compound catabolism                                | 1                                                                        | 6  | 4           | 0   | 0      | 14      | 0       | 1        | 11   | 3.9     |
| <b>t</b>  | Motility & Attachment                                     | 1                                                                        | 0  | 1           | 0   | 0      | 0       | 0       | 2        | 13   | 1.2     |
| <b>u</b>  | Chemotaxis                                                | 1                                                                        | 0  | 1           | 1   | 0      | 0       | 0       | 1        | 0    | 0.4     |
| <b>v</b>  | Related to phage, transposon, or plasmid                  | 0                                                                        | 5  | 10          | 1   | 0      | 0       | 0       | 0        | 1    | 3.2     |
| <b>w</b>  | Non-coding RNA gene                                       | 0                                                                        | 0  | 0           | 0   | 0      | 0       | 0       | 0        | 0    | 0.1     |
| <b>x</b>  | Protein secretion/export apparatus                        | 1                                                                        | 1  | 0           | 0   | 0      | 0       | 33      | 1        | 1    | 1.1     |
| <b>y</b>  | Cell division                                             | 0                                                                        | 0  | 0           | 0   | 0      | 0       | 0       | 1        | 0    | 0.3     |
| <b>zA</b> | Antibiotic resistance and susceptibility                  | 0                                                                        | 0  | 0           | 1   | 0      | 0       | 0       | 0        | 1    | 0.2     |
| <b>zB</b> | Transcription, RNA processing and degradation             | 0                                                                        | 0  | 0           | 0   | 0      | 0       | 3       | 1        | 0    | 0.4     |

Note: QS- quorum sensing, Oxi. Stress- oxidative stress, PCP- pentachlorophenol stress



Supplementary Table 3: List of genes that are uniquely expressed in the various transcriptome studies. The various conditions include iron response, quorum sensing, oxidative stress, pentachlorophenol stress, copper stress, sulfate starvation, osmotic shock, biofilm formation, alginate production and loss of the post-transcriptional regulator RsmA.

**Iron**

| ORF    | Product name                                                      | Function class                                            |
|--------|-------------------------------------------------------------------|-----------------------------------------------------------|
| PA0013 | conserved hypothetical protein                                    | Membrane proteins                                         |
| PA0027 | hypothetical protein                                              | Hypothetical, unclassified, unknown                       |
| PA0128 | conserved hypothetical protein                                    | Hypothetical, unclassified, unknown                       |
| PA0203 | probable binding protein component of ABC transporter             | Transport of small molecules                              |
| PA0223 | probable dihydrodipicolinate synthetase                           | Cell wall / LPS / capsule                                 |
| PA0224 | probable aldolase                                                 | Putative enzymes                                          |
| PA0251 | hypothetical protein                                              | Hypothetical, unclassified, unknown                       |
| PA0252 | hypothetical protein                                              | Hypothetical, unclassified, unknown                       |
| PA0265 | succinate-semialdehyde dehydrogenase                              | Central intermediary metabolism                           |
| PA0266 | 4-aminobutyrate aminotransferase                                  | Central intermediary metabolism                           |
| PA0296 | probable glutamine synthetase                                     | Putative enzymes                                          |
| PA0346 | hypothetical protein                                              | Hypothetical, unclassified, unknown                       |
| PA0417 | probable chemotaxis protein                                       | Chemotaxis                                                |
| PA0433 | hypothetical protein                                              | Hypothetical, unclassified, unknown                       |
| PA0460 | hypothetical protein                                              | Hypothetical, unclassified, unknown                       |
| PA0470 | Ferrichrome receptor FiuA                                         | Transport of small molecules                              |
| PA0471 | probable transmembrane sensor                                     | Two-component regulatory systems                          |
| PA0472 | probable sigma-70 factor, ECF subfamily                           | Transcriptional regulators                                |
| PA0500 | biotin synthase                                                   | Biosynthesis of cofactors, prosthetic groups and carriers |
| PA0527 | transcriptional regulator Dnr                                     | Transcriptional regulators                                |
| PA0539 | hypothetical protein                                              | Membrane proteins                                         |
| PA0605 | probable permease of ABC transporter                              | Membrane proteins                                         |
| PA0672 | heme oxygenase                                                    | Biosynthesis of cofactors, prosthetic groups and carriers |
| PA0707 | transcriptional regulator ToxR                                    | Transcriptional regulators                                |
| PA0725 | hypothetical protein of bacteriophage Pf1                         | Hypothetical, unclassified, unknown                       |
| PA0774 | conserved hypothetical protein                                    | Hypothetical, unclassified, unknown                       |
| PA0801 | hypothetical protein                                              | Membrane proteins                                         |
| PA0802 | hypothetical protein                                              | Membrane proteins                                         |
| PA0818 | hypothetical protein                                              | Hypothetical, unclassified, unknown                       |
| PA0842 | probable glycosyl transferase                                     | Putative enzymes                                          |
| PA0844 | hemolytic phospholipase C precursor                               | Secreted Factors (toxins, enzymes, alginate)              |
| PA0848 | probable alkyl hydroperoxide reductase                            | Adaptation, Protection                                    |
| PA0930 | two-component sensor                                              | Transport of small molecules                              |
| PA0931 | ferric enterobactin receptor PirA                                 | Transport of small molecules                              |
| PA0968 | conserved hypothetical protein                                    | Hypothetical, unclassified, unknown                       |
| PA1003 | Transcriptional regulator MvfR                                    | Biosynthesis of cofactors, prosthetic groups and carriers |
| PA1108 | probable major facilitator superfamily (MFS) transporter          | Membrane proteins                                         |
| PA1134 | hypothetical protein                                              | Hypothetical, unclassified, unknown                       |
| PA1148 | exotoxin A precursor                                              | Secreted Factors (toxins, enzymes, alginate)              |
| PA1211 | hypothetical protein                                              | Hypothetical, unclassified, unknown                       |
| PA1247 | alkaline protease secretion protein AprE                          | Secreted Factors (toxins, enzymes, alginate)              |
| PA1248 | Alkaline protease secretion outer membrane protein AprF precursor | Secreted Factors (toxins, enzymes, alginate)              |
| PA1249 | alkaline metalloproteinase precursor                              | Secreted Factors (toxins, enzymes, alginate)              |
| PA1300 | probable sigma-70 factor, ECF subfamily                           | Transcriptional regulators                                |
| PA1301 | probable transmembrane sensor                                     | Membrane proteins                                         |
| PA1302 | probable heme utilization protein precursor                       | Membrane proteins                                         |
| PA1316 | probable major facilitator superfamily (MFS) transporter          | Membrane proteins                                         |
| PA1317 | cytochrome o ubiquinol oxidase subunit II                         | Energy metabolism                                         |
| PA1318 | cytochrome o ubiquinol oxidase subunit I                          | Energy metabolism                                         |
| PA1319 | cytochrome o ubiquinol oxidase subunit III                        | Energy metabolism                                         |
| PA1320 | cytochrome o ubiquinol oxidase subunit IV                         | Energy metabolism                                         |
| PA1321 | cytochrome o ubiquinol oxidase protein CyoE                       | Energy metabolism                                         |
| PA1363 | probable sigma-70 factor, ECF subfamily                           | Transcriptional regulators                                |
| PA1365 | probable siderophore receptor                                     | Transport of small molecules                              |
| PA1431 | regulatory protein RsaL                                           | Secreted Factors (toxins, enzymes, alginate)              |
| PA1556 | probable cytochrome c oxidase subunit                             | Energy metabolism                                         |
| PA1559 | hypothetical protein                                              | Hypothetical, unclassified, unknown                       |
| PA1654 | probable aminotransferase                                         | Putative enzymes                                          |
| PA1655 | probable glutathione S-transferase                                | Putative enzymes                                          |
| PA1687 | spermidine synthase                                               | Amino acid biosynthesis and metabolism                    |
| PA1908 | probable major facilitator superfamily (MFS) transporter          | Membrane proteins                                         |
| PA1911 | probable transmembrane sensor                                     | Membrane proteins                                         |
| PA1917 | hypothetical protein                                              | Hypothetical, unclassified, unknown                       |
| PA1972 | conserved hypothetical protein                                    | Membrane proteins                                         |
| PA2002 | conserved hypothetical protein                                    | Hypothetical, unclassified, unknown                       |
| PA2021 | hypothetical protein                                              | Hypothetical, unclassified, unknown                       |

Supplementary Table 3

| ORF    | Product name                                                        | Function class                                            |
|--------|---------------------------------------------------------------------|-----------------------------------------------------------|
| PA2034 | hypothetical protein                                                | Hypothetical, unclassified, unknown                       |
| PA2038 | hypothetical protein                                                | Hypothetical, unclassified, unknown                       |
| PA2039 | hypothetical protein                                                | Membrane proteins                                         |
| PA2041 | probable amino acid permease                                        | Transport of small molecules                              |
| PA2131 | fimbrial subunit CupA4                                              | Motility & Attachment                                     |
| PA2181 | hypothetical protein                                                | Hypothetical, unclassified, unknown                       |
| PA2258 | transcriptional regulator PtxR                                      | Secreted Factors (toxins, enzymes, alginate)              |
| PA2383 | probable transcriptional regulator                                  | Transcriptional regulators                                |
| PA2384 | hypothetical protein                                                | Hypothetical, unclassified, unknown                       |
| PA2387 | probable sigma-70 factor, ECF subfamily                             | Transcriptional regulators                                |
| PA2388 | probable transmembrane sensor                                       | Membrane proteins                                         |
| PA2390 | probable ATP-binding/permease fusion ABC transporter                | Membrane proteins                                         |
| PA2391 | probable outer membrane protein precursor                           | Membrane proteins                                         |
| PA2395 | PvdO                                                                | Adaptation, Protection                                    |
| PA2406 | hypothetical protein                                                | Hypothetical, unclassified, unknown                       |
| PA2420 | probable porin                                                      | Membrane proteins                                         |
| PA2427 | hypothetical protein                                                | Hypothetical, unclassified, unknown                       |
| PA2437 | hypothetical protein                                                | Membrane proteins                                         |
| PA2441 | hypothetical protein                                                | Hypothetical, unclassified, unknown                       |
| PA2451 | hypothetical protein                                                | Hypothetical, unclassified, unknown                       |
| PA2467 | Anti-sigma factor FoxR                                              | Membrane proteins                                         |
| PA2490 | conserved hypothetical protein                                      | Hypothetical, unclassified, unknown                       |
| PA2531 | probable aminotransferase                                           | Amino acid biosynthesis and metabolism                    |
| PA2637 | NADH dehydrogenase I chain A                                        | Energy metabolism                                         |
| PA2638 | NADH dehydrogenase I chain B                                        | Energy metabolism                                         |
| PA2686 | two-component response regulator PfeR                               | Transcriptional regulators                                |
| PA2688 | Ferric enterobactin receptor, outer membrane protein PfeA precursor | Membrane proteins                                         |
| PA2691 | conserved hypothetical protein                                      | Hypothetical, unclassified, unknown                       |
| PA2753 | hypothetical protein                                                | Hypothetical, unclassified, unknown                       |
| PA2761 | hypothetical protein                                                | Membrane proteins                                         |
| PA2767 | probable enoyl-CoA hydratase/isomerase                              | Putative enzymes                                          |
| PA2776 | conserved hypothetical protein                                      | Hypothetical, unclassified, unknown                       |
| PA2910 | conserved hypothetical protein                                      | Hypothetical, unclassified, unknown                       |
| PA2916 | hypothetical protein                                                | Membrane proteins                                         |
| PA2917 | probable transcriptional regulator                                  | Transcriptional regulators                                |
| PA3049 | ribosome modulation factor                                          | Translation, post-translational modification, degradation |
| PA3165 | histidinol-phosphate aminotransferase                               | Amino acid biosynthesis and metabolism                    |
| PA3221 | CsaA protein                                                        | Protein secretion/export apparatus                        |
| PA3222 | hypothetical protein                                                | Membrane proteins                                         |
| PA3233 | hypothetical protein                                                | Hypothetical, unclassified, unknown                       |
| PA3355 | hypothetical protein                                                | Membrane proteins                                         |
| PA3397 | ferredoxin--NADP+ reductase                                         | Biosynthesis of cofactors, prosthetic groups and carriers |
| PA3407 | heme acquisition protein HasAp                                      | Transport of small molecules                              |
| PA3408 | Haem uptake outer membrane receptor HasR precursor                  | Transport of small molecules                              |
| PA3409 | probable transmembrane sensor                                       | Membrane proteins                                         |
| PA3410 | probable sigma-70 factor, ECF subfamily                             | Transcriptional regulators                                |
| PA3436 | hypothetical protein                                                | Hypothetical, unclassified, unknown                       |
| PA3530 | conserved hypothetical protein                                      | Hypothetical, unclassified, unknown                       |
| PA3553 | ArnC                                                                | Adaptation, Protection                                    |
| PA3556 | inner membrane L-Ara4N transferase ArnT                             | Adaptation, Protection                                    |
| PA3558 | ArnF                                                                | Membrane proteins                                         |
| PA3608 | polyamine transport protein PotB                                    | Membrane proteins                                         |
| PA3749 | probable major facilitator superfamily (MFS) transporter            | Membrane proteins                                         |
| PA3767 | conserved hypothetical protein                                      | Hypothetical, unclassified, unknown                       |
| PA3768 | probable metallo-oxidoreductase                                     | Putative enzymes                                          |
| PA3775 | hypothetical protein                                                | Membrane proteins                                         |
| PA3811 | heat shock protein HscB                                             | Chaperones & heat shock proteins                          |
| PA3812 | probable iron-binding protein IscA                                  | Biosynthesis of cofactors, prosthetic groups and carriers |
| PA3814 | L-cysteine desulfurase (pyridoxal phosphate-dependent)              | Amino acid biosynthesis and metabolism                    |
| PA3885 | hypothetical protein                                                | Hypothetical, unclassified, unknown                       |
| PA3901 | Fe(III) dicitrate transport protein FecA                            | Membrane proteins                                         |
| PA4090 | hypothetical protein                                                | Hypothetical, unclassified, unknown                       |
| PA4091 | 4-hydroxyphenylacetate 3-monooxygenase large chain                  | Carbon compound catabolism                                |
| PA4158 | ferric enterobactin transport protein FepC                          | Transport of small molecules                              |
| PA4175 | protease IV                                                         | Secreted Factors (toxins, enzymes, alginate)              |
| PA4223 | probable ATP-binding component of ABC transporter                   | Membrane proteins                                         |
| PA4224 | pyochelin biosynthetic protein PchG                                 | Transport of small molecules                              |
| PA4225 | pyochelin synthetase                                                | Secreted Factors (toxins, enzymes, alginate)              |

Supplementary Table 3

| ORF    | Product name                                                        | Function class                                            |
|--------|---------------------------------------------------------------------|-----------------------------------------------------------|
| PA4226 | dihydroaeruginosic acid synthetase                                  | Secreted Factors (toxins, enzymes, alginate)              |
| PA4227 | transcriptional regulator PchR                                      | Transcriptional regulators                                |
| PA4228 | pyochelin biosynthesis protein PchD                                 | Secreted Factors (toxins, enzymes, alginate)              |
| PA4229 | pyochelin biosynthetic protein PchC                                 | Secreted Factors (toxins, enzymes, alginate)              |
| PA4230 | salicylate biosynthesis protein PchB                                | Secreted Factors (toxins, enzymes, alginate)              |
| PA4231 | salicylate biosynthesis isochorismate synthase                      | Secreted Factors (toxins, enzymes, alginate)              |
| PA4288 | probable transcriptional regulator                                  | Transcriptional regulators                                |
| PA4357 | conserved hypothetical protein                                      | Hypothetical, unclassified, unknown                       |
| PA4358 | probable ferrous iron transport protein                             | Membrane proteins                                         |
| PA4359 | conserved hypothetical protein                                      | Hypothetical, unclassified, unknown                       |
| PA4370 | Insulin-cleaving metalloproteinase outer membrane protein precursor | Membrane proteins                                         |
| PA4371 | hypothetical protein                                                | Hypothetical, unclassified, unknown                       |
| PA4372 | hypothetical protein                                                | Hypothetical, unclassified, unknown                       |
| PA4500 | probable binding protein component of ABC transporter               | Transport of small molecules                              |
| PA4503 | probable permease of ABC transporter                                | Membrane proteins                                         |
| PA4513 | probable oxidoreductase                                             | Putative enzymes                                          |
| PA4514 | probable outer membrane receptor for iron transport                 | Transport of small molecules                              |
| PA4515 | conserved hypothetical protein                                      | Hypothetical, unclassified, unknown                       |
| PA4516 | hypothetical protein                                                | Hypothetical, unclassified, unknown                       |
| PA4517 | conserved hypothetical protein                                      | Hypothetical, unclassified, unknown                       |
| PA4519 | ornithine decarboxylase                                             | Amino acid biosynthesis and metabolism                    |
| PA4629 | hypothetical protein                                                | Hypothetical, unclassified, unknown                       |
| PA4630 | hypothetical protein                                                | Hypothetical, unclassified, unknown                       |
| PA4633 | probable chemotaxis transducer                                      | Adaptation, Protection                                    |
| PA4654 | probable major facilitator superfamily (MFS) transporter            | Membrane proteins                                         |
| PA4675 | probable TonB-dependent receptor                                    | Transport of small molecules                              |
| PA4687 | ferric iron-binding periplasmic protein HitA                        | Transport of small molecules                              |
| PA4688 | iron (III)-transport system permease HitB                           | Membrane proteins                                         |
| PA4706 | probable ATP-binding component of ABC transporter                   | Transport of small molecules                              |
| PA4773 | hypothetical protein                                                | Hypothetical, unclassified, unknown                       |
| PA4785 | probable acyl-CoA thiolase                                          | Putative enzymes                                          |
| PA4826 | hypothetical protein                                                | Hypothetical, unclassified, unknown                       |
| PA4833 | conserved hypothetical protein                                      | Membrane proteins                                         |
| PA4838 | hypothetical protein                                                | Hypothetical, unclassified, unknown                       |
| PA4858 | conserved hypothetical protein                                      | Hypothetical, unclassified, unknown                       |
| PA4860 | probable permease of ABC transporter                                | Membrane proteins                                         |
| PA4861 | probable ATP-binding component of ABC transporter                   | Transport of small molecules                              |
| PA4862 | probable ATP-binding component of ABC transporter                   | Transport of small molecules                              |
| PA4883 | hypothetical protein                                                | Hypothetical, unclassified, unknown                       |
| PA4892 | urease accessory protein UreF                                       | Biosynthesis of cofactors, prosthetic groups and carriers |
| PA4893 | urease accessory protein UreG                                       | Biosynthesis of cofactors, prosthetic groups and carriers |
| PA4894 | hypothetical protein                                                | Membrane proteins                                         |
| PA4895 | probable transmembrane sensor                                       | Membrane proteins                                         |
| PA4897 | hypothetical protein                                                | Hypothetical, unclassified, unknown                       |
| PA4973 | thiamin biosynthesis protein ThiC                                   | Biosynthesis of cofactors, prosthetic groups and carriers |
| PA5119 | glutamine synthetase                                                | Amino acid biosynthesis and metabolism                    |
| PA5124 | two-component sensor NtrB                                           | Two-component regulatory systems                          |
| PA5125 | two-component response regulator NtrC                               | Transcriptional regulators                                |
| PA5150 | probable short-chain dehydrogenase                                  | Putative enzymes                                          |
| PA5217 | probable binding protein component of ABC iron transporter          | Transport of small molecules                              |
| PA5287 | ammonium transporter AmtB                                           | Membrane proteins                                         |
| PA5309 | probable oxidoreductase                                             | Putative enzymes                                          |
| PA5312 | probable aldehyde dehydrogenase                                     | Putative enzymes                                          |
| PA5313 | probable pyridoxal-dependent aminotransferase                       | Putative enzymes                                          |
| PA5314 | hypothetical protein                                                | Hypothetical, unclassified, unknown                       |
| PA5386 | probable 3-hydroxyacyl-CoA dehydrogenase                            | Putative enzymes                                          |
| PA5479 | proton-glutamate symporter                                          | Membrane proteins                                         |
| PA5526 | hypothetical protein                                                | Hypothetical, unclassified, unknown                       |
| PA5531 | TonB protein                                                        | Transport of small molecules                              |

| ORF                   | Product name                                             | Function class                         |
|-----------------------|----------------------------------------------------------|----------------------------------------|
| <b>Quorum Sensing</b> |                                                          |                                        |
| PA0006                | conserved hypothetical protein                           | Hypothetical, unclassified, unknown    |
| PA0048                | probable transcriptional regulator                       | Transcriptional regulators             |
| PA0049                | hypothetical protein                                     | Hypothetical, unclassified, unknown    |
| PA0050                | hypothetical protein                                     | Hypothetical, unclassified, unknown    |
| PA0051                | potential phenazine-modifying enzyme                     | Putative enzymes                       |
| PA0052                | hypothetical protein                                     | Hypothetical, unclassified, unknown    |
| PA0055                | hypothetical protein                                     | Hypothetical, unclassified, unknown    |
| PA0079                | hypothetical protein                                     | Hypothetical, unclassified, unknown    |
| PA0080                | hypothetical protein                                     | Hypothetical, unclassified, unknown    |
| PA0097                | hypothetical protein                                     | Hypothetical, unclassified, unknown    |
| PA0105                | cytochrome c oxidase, subunit II                         | Energy metabolism                      |
| PA0106                | cytochrome c oxidase, subunit I                          | Energy metabolism                      |
| PA0107                | conserved hypothetical protein                           | Energy metabolism                      |
| PA0108                | cytochrome c oxidase, subunit III                        | Energy metabolism                      |
| PA0112                | hypothetical protein                                     | Membrane proteins                      |
| PA0113                | probable cytochrome c oxidase assembly factor            | Energy metabolism                      |
| PA0119                | probable dicarboxylate transporter                       | Transport of small molecules           |
| PA0122                | conserved hypothetical protein                           | Hypothetical, unclassified, unknown    |
| PA0129                | gamma-aminobutyrate permease                             | Transport of small molecules           |
| PA0130                | probable aldehyde dehydrogenase                          | Putative enzymes                       |
| PA0131                | hypothetical protein                                     | Hypothetical, unclassified, unknown    |
| PA0132                | beta-alanine--pyruvate transaminase                      | Amino acid biosynthesis and metabolism |
| PA0144                | hypothetical protein                                     | Hypothetical, unclassified, unknown    |
| PA0145                | hypothetical protein                                     | Hypothetical, unclassified, unknown    |
| PA0153                | protocatechuate 3,4-dioxygenase, beta subunit            | Carbon compound catabolism             |
| PA0154                | protocatechuate 3,4-dioxygenase, alpha subunit           | Carbon compound catabolism             |
| PA0160                | hypothetical protein                                     | Hypothetical, unclassified, unknown    |
| PA0167                | probable transcriptional regulator                       | Transcriptional regulators             |
| PA0191                | probable transcriptional regulator                       | Transcriptional regulators             |
| PA0200                | hypothetical protein                                     | Hypothetical, unclassified, unknown    |
| PA0209                | conserved hypothetical protein                           | Putative enzymes                       |
| PA0210                | malonate decarboxylase delta subunit                     | Carbon compound catabolism             |
| PA0211                | malonate decarboxylase beta subunit                      | Carbon compound catabolism             |
| PA0212                | malonate decarboxylase gamma subunit                     | Carbon compound catabolism             |
| PA0213                | hypothetical protein                                     | Carbon compound catabolism             |
| PA0214                | probable acyl transferase                                | Carbon compound catabolism             |
| PA0221                | probable aminotransferase                                | Putative enzymes                       |
| PA0226                | probable CoA transferase, subunit A                      | Carbon compound catabolism             |
| PA0227                | probable CoA transferase, subunit B                      | Carbon compound catabolism             |
| PA0228                | beta-ketoadipyl CoA thiolase PcaF                        | Fatty acid and phospholipid metabolism |
| PA0234                | hypothetical protein                                     | Hypothetical, unclassified, unknown    |
| PA0235                | 4-hydroxybenzoate transporter PcaK                       | Membrane proteins                      |
| PA0239                | hypothetical protein                                     | Membrane proteins                      |
| PA0241                | probable major facilitator superfamily (MFS) transporter | Membrane proteins                      |
| PA0251                | hypothetical protein                                     | Hypothetical, unclassified, unknown    |
| PA0264                | hypothetical protein                                     | Hypothetical, unclassified, unknown    |
| PA0265                | succinate-semialdehyde dehydrogenase                     | Central intermediary metabolism        |
| PA0266                | 4-aminobutyrate aminotransferase                         | Central intermediary metabolism        |
| PA0269                | conserved hypothetical protein                           | Hypothetical, unclassified, unknown    |
| PA0270                | hypothetical protein                                     | Hypothetical, unclassified, unknown    |
| PA0271                | hypothetical protein                                     | Hypothetical, unclassified, unknown    |
| PA0274                | hypothetical protein                                     | Hypothetical, unclassified, unknown    |
| PA0287                | 3-guanidinopropionate transport protein                  | Transport of small molecules           |
| PA0297                | probable glutamine amidotransferase                      | Amino acid biosynthesis and metabolism |
| PA0298                | probable glutamine synthetase                            | Putative enzymes                       |
| PA0299                | putrescine aminotransferase                              | Putative enzymes                       |
| PA0300                | polyamine transport protein                              | Transport of small molecules           |
| PA0301                | polyamine transport protein                              | Transport of small molecules           |
| PA0302                | polyamine transport protein PotG                         | Transport of small molecules           |
| PA0303                | polyamine transport protein PotH                         | Membrane proteins                      |
| PA0304                | polyamine transport protein PotI                         | Membrane proteins                      |
| PA0305                | hypothetical protein                                     | Hypothetical, unclassified, unknown    |
| PA0321                | probable acetylpolyamine aminohydrolase                  | Putative enzymes                       |
| PA0363                | phosphopantetheine adenyltransferase                     | Central intermediary metabolism        |
| PA0364                | probable oxidoreductase                                  | Putative enzymes                       |
| PA0385                | hypothetical protein                                     | Hypothetical, unclassified, unknown    |

Supplementary Table 3

| ORF    | Product name                                     | Function class                                            |
|--------|--------------------------------------------------|-----------------------------------------------------------|
| PA0399 | cystathionine beta-synthase                      | Amino acid biosynthesis and metabolism                    |
| PA0436 | probable transcriptional regulator               | Transcriptional regulators                                |
| PA0439 | probable oxidoreductase                          | Putative enzymes                                          |
| PA0440 | probable oxidoreductase                          | Putative enzymes                                          |
| PA0441 | dihydropyrimidinase                              | Nucleotide biosynthesis and metabolism                    |
| PA0443 | probable transporter                             | Membrane proteins                                         |
| PA0444 | N-carbamoyl-beta-alanine amidohydrolase          | Nucleotide biosynthesis and metabolism                    |
| PA0453 | hypothetical protein                             | Hypothetical, unclassified, unknown                       |
| PA0456 | probable cold-shock protein                      | Transcriptional regulators                                |
| PA0459 | probable ClpA/B protease ATP binding subunit     | Translation, post-translational modification, degradation |
| PA0467 | conserved hypothetical protein                   | Hypothetical, unclassified, unknown                       |
| PA0468 | hypothetical protein                             | Hypothetical, unclassified, unknown                       |
| PA0469 | hypothetical protein                             | Hypothetical, unclassified, unknown                       |
| PA0473 | probable glutathione S-transferase               | Putative enzymes                                          |
| PA0474 | hypothetical protein                             | Hypothetical, unclassified, unknown                       |
| PA0480 | probable hydrolase                               | Putative enzymes                                          |
| PA0482 | malate synthase G                                | Central intermediary metabolism                           |
| PA0489 | probable phosphoribosyl transferase              | Putative enzymes                                          |
| PA0497 | hypothetical protein                             | Hypothetical, unclassified, unknown                       |
| PA0498 | hypothetical protein                             | Hypothetical, unclassified, unknown                       |
| PA0512 | conserved hypothetical protein                   | Biosynthesis of cofactors, prosthetic groups and carriers |
| PA0513 | probable transcriptional regulator               | Biosynthesis of cofactors, prosthetic groups and carriers |
| PA0527 | transcriptional regulator Dnr                    | Transcriptional regulators                                |
| PA0542 | conserved hypothetical protein                   | Hypothetical, unclassified, unknown                       |
| PA0610 | transcriptional regulator PrtN                   | Transcriptional regulators                                |
| PA0614 | hypothetical protein                             | Hypothetical, unclassified, unknown                       |
| PA0615 | hypothetical protein                             | Hypothetical, unclassified, unknown                       |
| PA0616 | hypothetical protein                             | Related to phage, transposon, or plasmid                  |
| PA0617 | probable bacteriophage protein                   | Related to phage, transposon, or plasmid                  |
| PA0618 | probable bacteriophage protein                   | Related to phage, transposon, or plasmid                  |
| PA0619 | probable bacteriophage protein                   | Related to phage, transposon, or plasmid                  |
| PA0620 | probable bacteriophage protein                   | Related to phage, transposon, or plasmid                  |
| PA0621 | conserved hypothetical protein                   | Related to phage, transposon, or plasmid                  |
| PA0622 | probable bacteriophage protein                   | Related to phage, transposon, or plasmid                  |
| PA0623 | probable bacteriophage protein                   | Related to phage, transposon, or plasmid                  |
| PA0624 | hypothetical protein                             | Related to phage, transposon, or plasmid                  |
| PA0625 | hypothetical protein                             | Related to phage, transposon, or plasmid                  |
| PA0626 | hypothetical protein                             | Related to phage, transposon, or plasmid                  |
| PA0627 | conserved hypothetical protein                   | Related to phage, transposon, or plasmid                  |
| PA0628 | conserved hypothetical protein                   | Related to phage, transposon, or plasmid                  |
| PA0629 | conserved hypothetical protein                   | Related to phage, transposon, or plasmid                  |
| PA0630 | hypothetical protein                             | Related to phage, transposon, or plasmid                  |
| PA0631 | hypothetical protein                             | Related to phage, transposon, or plasmid                  |
| PA0632 | hypothetical protein                             | Related to phage, transposon, or plasmid                  |
| PA0635 | hypothetical protein                             | Related to phage, transposon, or plasmid                  |
| PA0636 | hypothetical protein                             | Related to phage, transposon, or plasmid                  |
| PA0637 | conserved hypothetical protein                   | Related to phage, transposon, or plasmid                  |
| PA0638 | probable bacteriophage protein                   | Related to phage, transposon, or plasmid                  |
| PA0639 | conserved hypothetical protein                   | Related to phage, transposon, or plasmid                  |
| PA0640 | probable bacteriophage protein                   | Related to phage, transposon, or plasmid                  |
| PA0641 | probable bacteriophage protein                   | Related to phage, transposon, or plasmid                  |
| PA0642 | hypothetical protein                             | Related to phage, transposon, or plasmid                  |
| PA0643 | hypothetical protein                             | Related to phage, transposon, or plasmid                  |
| PA0644 | hypothetical protein                             | Related to phage, transposon, or plasmid                  |
| PA0645 | hypothetical protein                             | Related to phage, transposon, or plasmid                  |
| PA0646 | hypothetical protein                             | Related to phage, transposon, or plasmid                  |
| PA0647 | hypothetical protein                             | Related to phage, transposon, or plasmid                  |
| PA0648 | hypothetical protein                             | Related to phage, transposon, or plasmid                  |
| PA0671 | hypothetical protein                             | Hypothetical, unclassified, unknown                       |
| PA0683 | probable type II secretion system protein        | Protein secretion/export apparatus                        |
| PA0701 | probable transcriptional regulator               | Transcriptional regulators                                |
| PA0717 | hypothetical protein of bacteriophage Pfl        | Hypothetical, unclassified, unknown                       |
| PA0718 | hypothetical protein of bacteriophage Pfl        | Hypothetical, unclassified, unknown                       |
| PA0719 | hypothetical protein of bacteriophage Pfl        | Hypothetical, unclassified, unknown                       |
| PA0720 | helix destabilizing protein of bacteriophage Pfl | DNA replication, recombination, modification and repair   |
| PA0721 | hypothetical protein of bacteriophage Pfl        | Hypothetical, unclassified, unknown                       |
| PA0723 | coat protein B of bacteriophage Pfl              | Related to phage, transposon, or plasmid                  |
| PA0736 | hypothetical protein                             | Membrane proteins                                         |

Supplementary Table 3

| ORF    | Product name                                               | Function class                                            |
|--------|------------------------------------------------------------|-----------------------------------------------------------|
| PA0740 | SDS hydrolase SdsA1                                        | Putative enzymes                                          |
| PA0745 | probable enoyl-CoA hydratase/isomerase                     | Putative enzymes                                          |
| PA0746 | probable acyl-CoA dehydrogenase                            | Putative enzymes                                          |
| PA0747 | probable aldehyde dehydrogenase                            | Putative enzymes                                          |
| PA0776 | hypothetical protein                                       | Hypothetical, unclassified, unknown                       |
| PA0783 | sodium/proline symporter PutP                              | Membrane proteins                                         |
| PA0826 | hypothetical protein                                       | Hypothetical, unclassified, unknown                       |
| PA0841 | hypothetical protein                                       | Hypothetical, unclassified, unknown                       |
| PA0845 | conserved hypothetical protein                             | Hypothetical, unclassified, unknown                       |
| PA0854 | fumarate hydratase                                         | Energy metabolism                                         |
| PA0867 | hypothetical protein                                       | Hypothetical, unclassified, unknown                       |
| PA0870 | aromatic amino acid aminotransferase                       | Amino acid biosynthesis and metabolism                    |
| PA0871 | pterin-4-alpha-carbinolamine dehydratase                   | Amino acid biosynthesis and metabolism                    |
| PA0885 | probable C4-dicarboxylate transporter                      | Transport of small molecules                              |
| PA0910 | hypothetical protein                                       | Hypothetical, unclassified, unknown                       |
| PA0938 | hypothetical protein                                       | Hypothetical, unclassified, unknown                       |
| PA0943 | hypothetical protein                                       | Hypothetical, unclassified, unknown                       |
| PA0997 | Homologous to beta-keto-acyl-acyl-carrier protein synthase | Biosynthesis of cofactors, prosthetic groups and carriers |
| PA0998 | Homologous to beta-keto-acyl-acyl-carrier protein synthase | Biosynthesis of cofactors, prosthetic groups and carriers |
| PA0999 | 3-oxoacyl-[acyl-carrier-protein] synthase III              | Biosynthesis of cofactors, prosthetic groups and carriers |
| PA1018 | hypothetical protein                                       | Hypothetical, unclassified, unknown                       |
| PA1019 | cis,cis-muconate transporter MucK                          | Membrane proteins                                         |
| PA1025 | probable porin                                             | Membrane proteins                                         |
| PA1049 | pyridoxine 5'-phosphate oxidase                            | Biosynthesis of cofactors, prosthetic groups and carriers |
| PA1051 | probable transporter                                       | Membrane proteins                                         |
| PA1070 | branched-chain amino acid transport protein BraG           | Transport of small molecules                              |
| PA1072 | branched-chain amino acid transport protein BraE           | Membrane proteins                                         |
| PA1073 | branched-chain amino acid transport protein BraD           | Membrane proteins                                         |
| PA1074 | branched-chain amino acid transport protein BraC           | Transport of small molecules                              |
| PA1106 | hypothetical protein                                       | Hypothetical, unclassified, unknown                       |
| PA1113 | probable ATP-binding/permease fusion ABC transporter       | Membrane proteins                                         |
| PA1123 | hypothetical protein                                       | Hypothetical, unclassified, unknown                       |
| PA1127 | probable oxidoreductase                                    | Adaptation, Protection                                    |
| PA1130 | rhamnosyltransferase 2                                     | Cell wall / LPS / capsule                                 |
| PA1131 | probable major facilitator superfamily (MFS) transporter   | Membrane proteins                                         |
| PA1137 | probable oxidoreductase                                    | Putative enzymes                                          |
| PA1143 | hypothetical protein                                       | Hypothetical, unclassified, unknown                       |
| PA1144 | probable major facilitator superfamily (MFS) transporter   | Membrane proteins                                         |
| PA1150 | pyocin S2                                                  | Adaptation, Protection                                    |
| PA1166 | hypothetical protein                                       | Hypothetical, unclassified, unknown                       |
| PA1183 | C4-dicarboxylate transport protein                         | Transport of small molecules                              |
| PA1186 | hypothetical protein                                       | Hypothetical, unclassified, unknown                       |
| PA1190 | conserved hypothetical protein                             | Membrane proteins                                         |
| PA1197 | hypothetical protein                                       | Hypothetical, unclassified, unknown                       |
| PA1206 | hypothetical protein                                       | Hypothetical, unclassified, unknown                       |
| PA1207 | glutathione-regulated potassium-efflux system protein KefB | Transport of small molecules                              |
| PA1220 | hypothetical protein                                       | Hypothetical, unclassified, unknown                       |
| PA1223 | probable transcriptional regulator                         | Transcriptional regulators                                |
| PA1228 | hypothetical protein                                       | Hypothetical, unclassified, unknown                       |
| PA1236 | probable major facilitator superfamily (MFS) transporter   | Membrane proteins                                         |
| PA1239 | hypothetical protein                                       | Hypothetical, unclassified, unknown                       |
| PA1242 | hypothetical protein                                       | Hypothetical, unclassified, unknown                       |
| PA1250 | alkaline proteinase inhibitor AprI                         | Secreted Factors (toxins, enzymes, alginate)              |
| PA1262 | probable major facilitator superfamily (MFS) transporter   | Membrane proteins                                         |
| PA1266 | probable oxidoreductase                                    | Putative enzymes                                          |
| PA1338 | gamma-glutamyltranspeptidase precursor                     | Amino acid biosynthesis and metabolism                    |
| PA1340 | probable permease of ABC transporter                       | Transport of small molecules                              |
| PA1341 | probable permease of ABC transporter                       | Membrane proteins                                         |
| PA1342 | probable binding protein component of ABC transporter      | Transport of small molecules                              |
| PA1344 | probable short-chain dehydrogenase                         | Putative enzymes                                          |
| PA1367 | hypothetical protein                                       | Hypothetical, unclassified, unknown                       |
| PA1377 | conserved hypothetical protein                             | Hypothetical, unclassified, unknown                       |
| PA1379 | probable short-chain dehydrogenase                         | Putative enzymes                                          |
| PA1386 | probable ATP-binding component of ABC transporter          | Transport of small molecules                              |
| PA1395 | hypothetical protein                                       | Hypothetical, unclassified, unknown                       |
| PA1399 | probable transcriptional regulator                         | Transcriptional regulators                                |
| PA1400 | probable pyruvate carboxylase                              | Energy metabolism                                         |
| PA1416 | conserved hypothetical protein                             | Hypothetical, unclassified, unknown                       |

Supplementary Table 3

| ORF    | Product name                                                           | Function class                                            |
|--------|------------------------------------------------------------------------|-----------------------------------------------------------|
| PA1418 | probable sodium:solute symport protein                                 | Transport of small molecules                              |
| PA1419 | probable transporter                                                   | Membrane proteins                                         |
| PA1426 | hypothetical protein                                                   | Hypothetical, unclassified, unknown                       |
| PA1431 | regulatory protein RsaL                                                | Secreted Factors (toxins, enzymes, alginate)              |
| PA1440 | hypothetical protein                                                   | Hypothetical, unclassified, unknown                       |
| PA1519 | probable transporter                                                   | Membrane proteins                                         |
| PA1537 | probable short-chain dehydrogenase                                     | Putative enzymes                                          |
| PA1538 | probable flavin-containing monooxygenase                               | Putative enzymes                                          |
| PA1540 | conserved hypothetical protein                                         | Membrane proteins                                         |
| PA1542 | hypothetical protein                                                   | Hypothetical, unclassified, unknown                       |
| PA1568 | conserved hypothetical protein                                         | Hypothetical, unclassified, unknown                       |
| PA1569 | probable major facilitator superfamily (MFS) transporter               | Membrane proteins                                         |
| PA1575 | hypothetical protein                                                   | Hypothetical, unclassified, unknown                       |
| PA1576 | probable 3-hydroxyisobutyrate dehydrogenase                            | Putative enzymes                                          |
| PA1608 | probable chemotaxis transducer                                         | Adaptation, Protection                                    |
| PA1609 | beta-ketoacyl-ACP synthase I                                           | Fatty acid and phospholipid metabolism                    |
| PA1610 | beta-hydroxydecanoyl-ACP dehydrase                                     | Fatty acid and phospholipid metabolism                    |
| PA1617 | probable AMP-binding enzyme                                            | Putative enzymes                                          |
| PA1650 | probable transporter                                                   | Membrane proteins                                         |
| PA1746 | hypothetical protein                                                   | Hypothetical, unclassified, unknown                       |
| PA1759 | probable transcriptional regulator                                     | Transcriptional regulators                                |
| PA1763 | hypothetical protein                                                   | Hypothetical, unclassified, unknown                       |
| PA1768 | hypothetical protein                                                   | Hypothetical, unclassified, unknown                       |
| PA1772 | probable methyltransferase                                             | Biosynthesis of cofactors, prosthetic groups and carriers |
| PA1774 | CfrX protein                                                           | Hypothetical, unclassified, unknown                       |
| PA1775 | conserved cytoplasmic membrane protein, CmpX protein                   | Membrane proteins                                         |
| PA1776 | ECF sigma factor SigX                                                  | Transcriptional regulators                                |
| PA1781 | assimilatory nitrite reductase large subunit                           | Central intermediary metabolism                           |
| PA1784 | hypothetical protein                                                   | Hypothetical, unclassified, unknown                       |
| PA1789 | hypothetical protein                                                   | Hypothetical, unclassified, unknown                       |
| PA1790 | hypothetical protein                                                   | Hypothetical, unclassified, unknown                       |
| PA1812 | membrane-bound lytic murein transglycosylase D precursor               | Amino acid biosynthesis and metabolism                    |
| PA1824 | conserved hypothetical protein                                         | Membrane proteins                                         |
| PA1852 | hypothetical protein                                                   | Hypothetical, unclassified, unknown                       |
| PA1853 | probable transcriptional regulator                                     | Transcriptional regulators                                |
| PA1871 | LasA protease precursor                                                | Secreted Factors (toxins, enzymes, alginate)              |
| PA1875 | probable outer membrane protein precursor                              | Protein secretion/export apparatus                        |
| PA1891 | hypothetical protein                                                   | Membrane proteins                                         |
| PA1892 | hypothetical protein                                                   | Hypothetical, unclassified, unknown                       |
| PA1893 | hypothetical protein                                                   | Putative enzymes                                          |
| PA1895 | hypothetical protein                                                   | Membrane proteins                                         |
| PA1896 | hypothetical protein                                                   | Hypothetical, unclassified, unknown                       |
| PA1897 | hypothetical protein                                                   | Hypothetical, unclassified, unknown                       |
| PA1898 | quorum-sensing control repressor                                       | Transcriptional regulators                                |
| PA1901 | phenazine biosynthesis protein PhzC                                    | Secreted Factors (toxins, enzymes, alginate)              |
| PA1903 | phenazine biosynthesis protein PhzE                                    | Secreted Factors (toxins, enzymes, alginate)              |
| PA1905 | probable pyridoxamine 5'-phosphate oxidase                             | Secreted Factors (toxins, enzymes, alginate)              |
| PA1922 | probable TonB-dependent receptor                                       | Transport of small molecules                              |
| PA1924 | hypothetical protein                                                   | Hypothetical, unclassified, unknown                       |
| PA1927 | 5-methyltetrahydropteroyltriglutamate-homocysteine S-methyltransferase | Amino acid biosynthesis and metabolism                    |
| PA1935 | hypothetical protein                                                   | Hypothetical, unclassified, unknown                       |
| PA1942 | hypothetical protein                                                   | Hypothetical, unclassified, unknown                       |
| PA1946 | binding protein component precursor of ABC ribose transporter          | Transport of small molecules                              |
| PA1947 | ribose transport protein RbsA                                          | Transport of small molecules                              |
| PA1955 | hypothetical protein                                                   | Hypothetical, unclassified, unknown                       |
| PA1974 | hypothetical protein                                                   | Hypothetical, unclassified, unknown                       |
| PA1976 | probable two-component sensor                                          | Two-component regulatory systems                          |
| PA1977 | hypothetical protein                                                   | Membrane proteins                                         |
| PA1978 | probable transcriptional regulator                                     | Transcriptional regulators                                |
| PA1979 | probable two-component sensor                                          | Two-component regulatory systems                          |
| PA1980 | probable two-component response regulator                              | Transcriptional regulators                                |
| PA1981 | hypothetical protein                                                   | Hypothetical, unclassified, unknown                       |
| PA1983 | cytochrome c550                                                        | Energy metabolism                                         |
| PA1984 | probable aldehyde dehydrogenase                                        | Putative enzymes                                          |
| PA1991 | probable iron-containing alcohol dehydrogenase                         | Putative enzymes                                          |
| PA1992 | probable two-component sensor                                          | Two-component regulatory systems                          |
| PA2000 | probable CoA transferase, subunit B                                    | Amino acid biosynthesis and metabolism                    |
| PA2001 | acetyl-CoA acetyltransferase                                           | Central intermediary metabolism                           |

Supplementary Table 3

| ORF    | Product name                                                           | Function class                               |
|--------|------------------------------------------------------------------------|----------------------------------------------|
| PA2002 | conserved hypothetical protein                                         | Hypothetical, unclassified, unknown          |
| PA2003 | 3-hydroxybutyrate dehydrogenase                                        | Carbon compound catabolism                   |
| PA2004 | conserved hypothetical protein                                         | Membrane proteins                            |
| PA2006 | probable major facilitator superfamily (MFS) transporter               | Membrane proteins                            |
| PA2012 | methylcrotonyl-CoA carboxylase, alpha-subunit (biotin-containing)      | Carbon compound catabolism                   |
| PA2013 | putative 3-methylglutaconyl-CoA hydratase                              | Carbon compound catabolism                   |
| PA2014 | methylcrotonyl-CoA carboxylase, beta-subunit                           | Carbon compound catabolism                   |
| PA2015 | putative isovaleryl-CoA dehydrogenase                                  | Carbon compound catabolism                   |
| PA2018 | Resistance-Nodulation-Cell Division (RND) multidrug efflux transporter | Transport of small molecules                 |
| PA2030 | hypothetical protein                                                   | Hypothetical, unclassified, unknown          |
| PA2031 | hypothetical protein                                                   | Hypothetical, unclassified, unknown          |
| PA2041 | probable amino acid permease                                           | Transport of small molecules                 |
| PA2060 | probable permease of ABC transporter                                   | Transport of small molecules                 |
| PA2066 | hypothetical protein                                                   | Hypothetical, unclassified, unknown          |
| PA2067 | probable hydrolase                                                     | Putative enzymes                             |
| PA2068 | probable major facilitator superfamily (MFS) transporter               | Membrane proteins                            |
| PA2069 | probable carbamoyl transferase                                         | Putative enzymes                             |
| PA2079 | probable amino acid permease                                           | Transport of small molecules                 |
| PA2091 | hypothetical protein                                                   | Membrane proteins                            |
| PA2109 | hypothetical protein                                                   | Hypothetical, unclassified, unknown          |
| PA2110 | hypothetical protein                                                   | Hypothetical, unclassified, unknown          |
| PA2116 | conserved hypothetical protein                                         | Hypothetical, unclassified, unknown          |
| PA2119 | alcohol dehydrogenase (Zn-dependent)                                   | Putative enzymes                             |
| PA2122 | hypothetical protein                                                   | Hypothetical, unclassified, unknown          |
| PA2129 | chaperone CupA2                                                        | Motility & Attachment                        |
| PA2134 | hypothetical protein                                                   | Hypothetical, unclassified, unknown          |
| PA2160 | probable glycosyl hydrolase                                            | Putative enzymes                             |
| PA2161 | hypothetical protein                                                   | Hypothetical, unclassified, unknown          |
| PA2169 | hypothetical protein                                                   | Hypothetical, unclassified, unknown          |
| PA2172 | hypothetical protein                                                   | Hypothetical, unclassified, unknown          |
| PA2185 | non-heme catalase KatN                                                 | Adaptation, Protection                       |
| PA2198 | hypothetical protein                                                   | Hypothetical, unclassified, unknown          |
| PA2201 | hypothetical protein                                                   | Hypothetical, unclassified, unknown          |
| PA2209 | hypothetical protein                                                   | Hypothetical, unclassified, unknown          |
| PA2210 | probable major facilitator superfamily (MFS) transporter               | Membrane proteins                            |
| PA2211 | conserved hypothetical protein                                         | Hypothetical, unclassified, unknown          |
| PA2212 | conserved hypothetical protein                                         | Hypothetical, unclassified, unknown          |
| PA2213 | probable porin                                                         | Membrane proteins                            |
| PA2214 | probable major facilitator superfamily (MFS) transporter               | Membrane proteins                            |
| PA2217 | probable aldehyde dehydrogenase                                        | Putative enzymes                             |
| PA2225 | hypothetical protein                                                   | Hypothetical, unclassified, unknown          |
| PA2228 | hypothetical protein                                                   | Hypothetical, unclassified, unknown          |
| PA2249 | branched-chain alpha-keto acid dehydrogenase (lipoamide component)     | Amino acid biosynthesis and metabolism       |
| PA2250 | lipoamide dehydrogenase-Val                                            | Amino acid biosynthesis and metabolism       |
| PA2258 | transcriptional regulator PtxR                                         | Secreted Factors (toxins, enzymes, alginate) |
| PA2274 | hypothetical protein                                                   | Hypothetical, unclassified, unknown          |
| PA2300 | chitinase                                                              | Carbon compound catabolism                   |
| PA2303 | hypothetical protein                                                   | Hypothetical, unclassified, unknown          |
| PA2313 | hypothetical protein                                                   | Membrane proteins                            |
| PA2322 | gluconate permease                                                     | Transport of small molecules                 |
| PA2328 | hypothetical protein                                                   | Hypothetical, unclassified, unknown          |
| PA2329 | probable ATP-binding component of ABC transporter                      | Transport of small molecules                 |
| PA2330 | hypothetical protein                                                   | Hypothetical, unclassified, unknown          |
| PA2334 | probable transcriptional regulator                                     | Transcriptional regulators                   |
| PA2359 | probable transcriptional regulator                                     | Transcriptional regulators                   |
| PA2423 | hypothetical protein                                                   | Hypothetical, unclassified, unknown          |
| PA2439 | hypothetical protein                                                   | Membrane proteins                            |
| PA2453 | hypothetical protein                                                   | Hypothetical, unclassified, unknown          |
| PA2474 | hypothetical protein                                                   | Hypothetical, unclassified, unknown          |
| PA2499 | probable deaminase                                                     | Putative enzymes                             |
| PA2507 | catechol 1,2-dioxygenase                                               | Carbon compound catabolism                   |
| PA2508 | muconolactone delta-isomerase                                          | Carbon compound catabolism                   |
| PA2509 | muconate cycloisomerase I                                              | Carbon compound catabolism                   |
| PA2511 | probable transcriptional regulator                                     | Transcriptional regulators                   |
| PA2512 | anthranilate dioxygenase large subunit                                 | Carbon compound catabolism                   |
| PA2513 | anthranilate dioxygenase small subunit                                 | Carbon compound catabolism                   |
| PA2514 | anthranilate dioxygenase reductase                                     | Carbon compound catabolism                   |
| PA2515 | cis-1,2-dihydroxycyclohexa-3,4-diene carboxylate dehydrogenase         | Carbon compound catabolism                   |



Supplementary Table 3

| ORF    | Product name                                               | Function class                                            |
|--------|------------------------------------------------------------|-----------------------------------------------------------|
| PA2516 | toluate 1,2-dioxygenase electron transfer component        | Energy metabolism                                         |
| PA2517 | toluate 1,2-dioxygenase beta subunit                       | Carbon compound catabolism                                |
| PA2518 | toluate 1,2-dioxygenase alpha subunit                      | Carbon compound catabolism                                |
| PA2519 | transcriptional regulator XylS                             | Transcriptional regulators                                |
| PA2529 | hypothetical protein                                       | Hypothetical, unclassified, unknown                       |
| PA2554 | probable short-chain dehydrogenase                         | Putative enzymes                                          |
| PA2555 | probable AMP-binding enzyme                                | Putative enzymes                                          |
| PA2557 | probable AMP-binding enzyme                                | Fatty acid and phospholipid metabolism                    |
| PA2564 | hypothetical protein                                       | Hypothetical, unclassified, unknown                       |
| PA2566 | conserved hypothetical protein                             | Hypothetical, unclassified, unknown                       |
| PA2567 | hypothetical protein                                       | Hypothetical, unclassified, unknown                       |
| PA2570 | LecA                                                       | Adaptation, Protection                                    |
| PA2587 | probable FAD-dependent monooxygenase                       | Biosynthesis of cofactors, prosthetic groups and carriers |
| PA2591 | probable transcriptional regulator                         | Transcriptional regulators                                |
| PA2595 | conserved hypothetical protein                             | Hypothetical, unclassified, unknown                       |
| PA2625 | conserved hypothetical protein                             | Hypothetical, unclassified, unknown                       |
| PA2629 | adenylosuccinate lyase                                     | Amino acid biosynthesis and metabolism                    |
| PA2654 | probable chemotaxis transducer                             | Adaptation, Protection                                    |
| PA2660 | hypothetical protein                                       | Hypothetical, unclassified, unknown                       |
| PA2667 | conserved hypothetical protein                             | Hypothetical, unclassified, unknown                       |
| PA2682 | conserved hypothetical protein                             | Putative enzymes                                          |
| PA2711 | probable periplasmic spermidine/putrescine-binding protein | Transport of small molecules                              |
| PA2717 | chloroperoxidase precursor                                 | Central intermediary metabolism                           |
| PA2719 | hypothetical protein                                       | Hypothetical, unclassified, unknown                       |
| PA2753 | hypothetical protein                                       | Hypothetical, unclassified, unknown                       |
| PA2754 | conserved hypothetical protein                             | Hypothetical, unclassified, unknown                       |
| PA2769 | hypothetical protein                                       | Hypothetical, unclassified, unknown                       |
| PA2776 | conserved hypothetical protein                             | Hypothetical, unclassified, unknown                       |
| PA2778 | hypothetical protein                                       | Hypothetical, unclassified, unknown                       |
| PA2779 | hypothetical protein                                       | Hypothetical, unclassified, unknown                       |
| PA2780 | hypothetical protein                                       | Hypothetical, unclassified, unknown                       |
| PA2781 | hypothetical protein                                       | Hypothetical, unclassified, unknown                       |
| PA2801 | hypothetical protein                                       | Hypothetical, unclassified, unknown                       |
| PA2805 | hypothetical protein                                       | Hypothetical, unclassified, unknown                       |
| PA2819 | hypothetical protein                                       | Hypothetical, unclassified, unknown                       |
| PA2838 | probable transcriptional regulator                         | Transcriptional regulators                                |
| PA2847 | conserved hypothetical protein                             | Hypothetical, unclassified, unknown                       |
| PA2851 | translation elongation factor P                            | Translation, post-translational modification, degradation |
| PA2876 | orotidine 5'-phosphate decarboxylase                       | Nucleotide biosynthesis and metabolism                    |
| PA2892 | GCase, alpha-subunit (biotin-containing)                   | Putative enzymes                                          |
| PA2905 | precorrin isomerase CobH                                   | Biosynthesis of cofactors, prosthetic groups and carriers |
| PA2915 | hypothetical protein                                       | Hypothetical, unclassified, unknown                       |
| PA2922 | probable hydrolase                                         | Putative enzymes                                          |
| PA2924 | histidine transport system permease HisQ                   | Membrane proteins                                         |
| PA2927 | hypothetical protein                                       | Hypothetical, unclassified, unknown                       |
| PA2938 | probable transporter                                       | Membrane proteins                                         |
| PA2939 | probable aminopeptidase                                    | Secreted Factors (toxins, enzymes, alginate)              |
| PA2942 | probable magnesium chelatase                               | Biosynthesis of cofactors, prosthetic groups and carriers |
| PA2950 | hypothetical protein                                       | Hypothetical, unclassified, unknown                       |
| PA2960 | type 4 fimbrial biogenesis protein PilZ                    | Motility & Attachment                                     |
| PA2966 | acyl carrier protein                                       | Fatty acid and phospholipid metabolism                    |
| PA2967 | 3-oxoacyl-[acyl-carrier-protein] reductase                 | Fatty acid and phospholipid metabolism                    |
| PA2968 | malonyl-CoA-[acyl-carrier-protein] transacylase            | Fatty acid and phospholipid metabolism                    |
| PA3032 | cytochrome c Snr1                                          | Energy metabolism                                         |
| PA3035 | probable glutathione S-transferase                         | Putative enzymes                                          |
| PA3036 | hypothetical protein                                       | Hypothetical, unclassified, unknown                       |
| PA3062 | PeIC                                                       | Cell wall / LPS / capsule                                 |
| PA3066 | hypothetical protein                                       | Hypothetical, unclassified, unknown                       |
| PA3079 | hypothetical protein                                       | Membrane proteins                                         |
| PA3131 | probable aldolase                                          | Central intermediary metabolism                           |
| PA3139 | probable amino acid aminotransferase                       | Amino acid biosynthesis and metabolism                    |
| PA3186 | Glucose/carbohydrate outer membrane porin OprB precursor   | Transport of small molecules                              |
| PA3188 | probable permease of ABC sugar transporter                 | Transport of small molecules                              |
| PA3189 | probable permease of ABC sugar transporter                 | Transport of small molecules                              |
| PA3208 | conserved hypothetical protein                             | Hypothetical, unclassified, unknown                       |
| PA3209 | conserved hypothetical protein                             | Hypothetical, unclassified, unknown                       |
| PA3213 | hypothetical protein                                       | Hypothetical, unclassified, unknown                       |
| PA3221 | CsaA protein                                               | Protein secretion/export apparatus                        |

Supplementary Table 3

| ORF    | Product name                                                | Function class                                            |
|--------|-------------------------------------------------------------|-----------------------------------------------------------|
| PA3234 | probable sodium:solute symporter                            | Membrane proteins                                         |
| PA3236 | probable glycine betaine-binding protein precursor          | Adaptation, Protection                                    |
| PA3237 | hypothetical protein                                        | Hypothetical, unclassified, unknown                       |
| PA3249 | probable transcriptional regulator                          | Transcriptional regulators                                |
| PA3270 | hypothetical protein                                        | Hypothetical, unclassified, unknown                       |
| PA3283 | conserved hypothetical protein                              | Hypothetical, unclassified, unknown                       |
| PA3295 | probable HIT family protein                                 | Putative enzymes                                          |
| PA3301 | hypothetical protein                                        | Putative enzymes                                          |
| PA3309 | conserved hypothetical protein                              | Hypothetical, unclassified, unknown                       |
| PA3313 | hypothetical protein                                        | Transport of small molecules                              |
| PA3326 | probable Clp-family ATP-dependent protease                  | Translation, post-translational modification, degradation |
| PA3329 | hypothetical protein                                        | Hypothetical, unclassified, unknown                       |
| PA3330 | probable short chain dehydrogenase                          | Putative enzymes                                          |
| PA3331 | cytochrome P450                                             | Adaptation, Protection                                    |
| PA3332 | conserved hypothetical protein                              | Hypothetical, unclassified, unknown                       |
| PA3333 | 3-oxoacyl-[acyl-carrier-protein] synthase III               | Fatty acid and phospholipid metabolism                    |
| PA3334 | probable acyl carrier protein                               | Fatty acid and phospholipid metabolism                    |
| PA3335 | hypothetical protein                                        | Hypothetical, unclassified, unknown                       |
| PA3336 | probable major facilitator superfamily (MFS) transporter    | Membrane proteins                                         |
| PA3337 | ADP-L-glycero-D-mannoheptose 6-epimerase                    | Cell wall / LPS / capsule                                 |
| PA3361 | fucose-binding lectin PA-III                                | Motility & Attachment                                     |
| PA3362 | hypothetical protein                                        | Membrane proteins                                         |
| PA3363 | aliphatic amidase regulator                                 | Carbon compound catabolism                                |
| PA3364 | aliphatic amidase expression-regulating protein             | Transcriptional regulators                                |
| PA3365 | probable chaperone                                          | Chaperones & heat shock proteins                          |
| PA3366 | aliphatic amidase                                           | Carbon compound catabolism                                |
| PA3394 | NosF protein                                                | Energy metabolism                                         |
| PA3422 | hypothetical protein                                        | Hypothetical, unclassified, unknown                       |
| PA3431 | conserved hypothetical protein                              | Membrane proteins                                         |
| PA3432 | hypothetical protein                                        | Membrane proteins                                         |
| PA3458 | probable transcriptional regulator                          | Transcriptional regulators                                |
| PA3466 | probable ATP-dependent RNA helicase                         | Transcription, RNA processing and degradation             |
| PA3467 | probable major facilitator superfamily (MFS) transporter    | Membrane proteins                                         |
| PA3478 | rhamnosyltransferase chain B                                | Secreted Factors (toxins, enzymes, alginate)              |
| PA3479 | rhamnosyltransferase chain A                                | Secreted Factors (toxins, enzymes, alginate)              |
| PA3480 | probable deoxycytidine triphosphate deaminase               | Nucleotide biosynthesis and metabolism                    |
| PA3507 | probable short-chain dehydrogenase                          | Putative enzymes                                          |
| PA3524 | lactoylglutathione lyase                                    | Central intermediary metabolism                           |
| PA3529 | probable peroxidase                                         | Adaptation, Protection                                    |
| PA3535 | probable serine protease                                    | Putative enzymes                                          |
| PA3542 | alginate biosynthesis protein Alg44                         | Cell wall / LPS / capsule                                 |
| PA3555 | ArnD                                                        | Adaptation, Protection                                    |
| PA3559 | probable nucleotide sugar dehydrogenase                     | Putative enzymes                                          |
| PA3560 | phosphotransferase system, fructose-specific IIBC component | Carbon compound catabolism                                |
| PA3562 | probable phosphotransferase system enzyme I                 | Central intermediary metabolism                           |
| PA3564 | conserved hypothetical protein                              | Hypothetical, unclassified, unknown                       |
| PA3565 | probable transcriptional regulator                          | Transcriptional regulators                                |
| PA3568 | probable acetyl-coa synthetase                              | Putative enzymes                                          |
| PA3569 | 3-hydroxyisobutyrate dehydrogenase                          | Carbon compound catabolism                                |
| PA3570 | methyilmalonate-semialdehyde dehydrogenase                  | Amino acid biosynthesis and metabolism                    |
| PA3572 | hypothetical protein                                        | Hypothetical, unclassified, unknown                       |
| PA3581 | glycerol uptake facilitator protein                         | Transport of small molecules                              |
| PA3582 | glycerol kinase                                             | Central intermediary metabolism                           |
| PA3586 | probable hydrolase                                          | Putative enzymes                                          |
| PA3595 | probable major facilitator superfamily (MFS) transporter    | Membrane proteins                                         |
| PA3608 | polyamine transport protein PotB                            | Membrane proteins                                         |
| PA3613 | hypothetical protein                                        | Hypothetical, unclassified, unknown                       |
| PA3614 | hypothetical protein                                        | Hypothetical, unclassified, unknown                       |
| PA3618 | conserved hypothetical protein                              | Hypothetical, unclassified, unknown                       |
| PA3621 | ferredoxin I                                                | Energy metabolism                                         |
| PA3661 | hypothetical protein                                        | Hypothetical, unclassified, unknown                       |
| PA3662 | hypothetical protein                                        | Hypothetical, unclassified, unknown                       |
| PA3674 | hypothetical protein                                        | Hypothetical, unclassified, unknown                       |
| PA3682 | hypothetical protein                                        | Hypothetical, unclassified, unknown                       |
| PA3686 | adenylate kinase                                            | Nucleotide biosynthesis and metabolism                    |
| PA3692 | probable outer membrane protein precursor                   | Membrane proteins                                         |
| PA3699 | probable transcriptional regulator                          | Transcriptional regulators                                |
| PA3710 | probable GMC-type oxidoreductase                            | Carbon compound catabolism                                |

Supplementary Table 3

| ORF    | Product name                                             | Function class                                            |
|--------|----------------------------------------------------------|-----------------------------------------------------------|
| PA3718 | probable major facilitator superfamily (MFS) transporter | Membrane proteins                                         |
| PA3724 | elastase LasB                                            | Secreted Factors (toxins, enzymes, alginate)              |
| PA3737 | thiol:disulfide interchange protein DsbC                 | Translation, post-translational modification, degradation |
| PA3779 | hypothetical protein                                     | Hypothetical, unclassified, unknown                       |
| PA3780 | hypothetical protein                                     | Membrane proteins                                         |
| PA3781 | probable transporter                                     | Membrane proteins                                         |
| PA3789 | hypothetical protein                                     | Membrane proteins                                         |
| PA3795 | probable oxidoreductase                                  | Putative enzymes                                          |
| PA3836 | hypothetical protein                                     | Hypothetical, unclassified, unknown                       |
| PA3837 | probable permease of ABC transporter                     | Membrane proteins                                         |
| PA3838 | probable ATP-binding component of ABC transporter        | Transport of small molecules                              |
| PA3839 | probable sodium:sulfate symporter                        | Membrane proteins                                         |
| PA3840 | conserved hypothetical protein                           | Hypothetical, unclassified, unknown                       |
| PA3865 | probable amino acid binding protein                      | Transport of small molecules                              |
| PA3880 | conserved hypothetical protein                           | Hypothetical, unclassified, unknown                       |
| PA3887 | Na <sup>+</sup> /H <sup>+</sup> antiporter NhaP          | Membrane proteins                                         |
| PA3906 | hypothetical protein                                     | Hypothetical, unclassified, unknown                       |
| PA3908 | hypothetical protein                                     | Hypothetical, unclassified, unknown                       |
| PA3913 | probable protease                                        | Putative enzymes                                          |
| PA3940 | probable DNA binding protein                             | DNA replication, recombination, modification and repair   |
| PA3959 | hypothetical protein                                     | Hypothetical, unclassified, unknown                       |
| PA3960 | hypothetical protein                                     | Hypothetical, unclassified, unknown                       |
| PA3966 | hypothetical protein                                     | Membrane proteins                                         |
| PA3967 | hypothetical protein                                     | Hypothetical, unclassified, unknown                       |
| PA3984 | apolipoprotein N-acyltransferase                         | Cell wall / LPS / capsule                                 |
| PA4021 | probable transcriptional regulator                       | Transcriptional regulators                                |
| PA4023 | probable transport protein                               | Transport of small molecules                              |
| PA4024 | ethanolamine ammonia-lyase large subunit                 | Central intermediary metabolism                           |
| PA4025 | probable ethanolamine ammonia-lyase light chain          | Carbon compound catabolism                                |
| PA4031 | inorganic pyrophosphatase                                | Central intermediary metabolism                           |
| PA4055 | riboflavin synthase alpha chain                          | Biosynthesis of cofactors, prosthetic groups and carriers |
| PA4057 | NrdR                                                     | Nucleotide biosynthesis and metabolism                    |
| PA4058 | hypothetical protein                                     | Hypothetical, unclassified, unknown                       |
| PA4070 | probable transcriptional regulator                       | Transcriptional regulators                                |
| PA4072 | probable amino acid permease                             | Transport of small molecules                              |
| PA4073 | probable aldehyde dehydrogenase                          | Putative enzymes                                          |
| PA4078 | probable nonribosomal peptide synthetase                 | Adaptation, Protection                                    |
| PA4079 | probable dehydrogenase                                   | Putative enzymes                                          |
| PA4091 | 4-hydroxyphenylacetate 3-monooxygenase large chain       | Carbon compound catabolism                                |
| PA4092 | 4-hydroxyphenylacetate 3-monooxygenase small chain       | Carbon compound catabolism                                |
| PA4093 | hypothetical protein                                     | Hypothetical, unclassified, unknown                       |
| PA4094 | probable transcriptional regulator                       | Transcriptional regulators                                |
| PA4120 | probable transcriptional regulator                       | Transcriptional regulators                                |
| PA4121 | conserved hypothetical protein                           | Hypothetical, unclassified, unknown                       |
| PA4122 | conserved hypothetical protein                           | Hypothetical, unclassified, unknown                       |
| PA4123 | 5-carboxy-2-hydroxymuconate semialdehyde dehydrogenase   | Carbon compound catabolism                                |
| PA4124 | homoprotocatechuate 2,3-dioxygenase                      | Carbon compound catabolism                                |
| PA4125 | 5-carboxymethyl-2-hydroxymuconate isomerase              | Carbon compound catabolism                                |
| PA4126 | probable major facilitator superfamily (MFS) transporter | Membrane proteins                                         |
| PA4127 | 2-oxo-hept-3-ene-1,7-dioate hydratase                    | Carbon compound catabolism                                |
| PA4128 | conserved hypothetical protein                           | Putative enzymes                                          |
| PA4129 | hypothetical protein                                     | Hypothetical, unclassified, unknown                       |
| PA4130 | probable sulfite or nitrite reductase                    | Central intermediary metabolism                           |
| PA4131 | probable iron-sulfur protein                             | Putative enzymes                                          |
| PA4132 | conserved hypothetical protein                           | Hypothetical, unclassified, unknown                       |
| PA4133 | cytochrome c oxidase subunit (cbb3-type)                 | Energy metabolism                                         |
| PA4134 | hypothetical protein                                     | Hypothetical, unclassified, unknown                       |
| PA4136 | probable major facilitator superfamily (MFS) transporter | Membrane proteins                                         |
| PA4137 | probable porin                                           | Transport of small molecules                              |
| PA4140 | hypothetical protein                                     | Hypothetical, unclassified, unknown                       |
| PA4141 | hypothetical protein                                     | Hypothetical, unclassified, unknown                       |
| PA4142 | probable secretion protein                               | Protein secretion/export apparatus                        |
| PA4147 | transcriptional regulator AcoR                           | Transcriptional regulators                                |
| PA4148 | probable short-chain dehydrogenase                       | Putative enzymes                                          |
| PA4150 | probable dehydrogenase E1 component                      | Carbon compound catabolism                                |
| PA4151 | acetoin catabolism protein AcoB                          | Carbon compound catabolism                                |
| PA4152 | probable hydrolase                                       | Carbon compound catabolism                                |
| PA4153 | 2,3-butanediol dehydrogenase                             | Carbon compound catabolism                                |

Supplementary Table 3

| ORF    | Product name                                                                      | Function class                                            |
|--------|-----------------------------------------------------------------------------------|-----------------------------------------------------------|
| PA4175 | protease IV                                                                       | Secreted Factors (toxins, enzymes, alginate)              |
| PA4180 | probable acetolactate synthase large subunit                                      | Amino acid biosynthesis and metabolism                    |
| PA4205 | hypothetical protein                                                              | Membrane proteins                                         |
| PA4206 | probable Resistance-Nodulation-Cell Division (RND) efflux membrane fusion protein | Transport of small molecules                              |
| PA4207 | probable Resistance-Nodulation-Cell Division (RND) efflux transporter             | Membrane proteins                                         |
| PA4208 | probable outer membrane protein precursor                                         | Membrane proteins                                         |
| PA4209 | probable phenazine-specific methyltransferase                                     | Putative enzymes                                          |
| PA4210 | probable phenazine biosynthesis protein                                           | Secreted Factors (toxins, enzymes, alginate)              |
| PA4211 | probable phenazine biosynthesis protein                                           | Secreted Factors (toxins, enzymes, alginate)              |
| PA4288 | probable transcriptional regulator                                                | Transcriptional regulators                                |
| PA4293 | two-component sensor PprA                                                         | Two-component regulatory systems                          |
| PA4294 | hypothetical protein                                                              | Hypothetical, unclassified, unknown                       |
| PA4297 | TadG                                                                              | Membrane proteins                                         |
| PA4298 | hypothetical protein                                                              | Hypothetical, unclassified, unknown                       |
| PA4316 | exodeoxyribonuclease I                                                            | DNA replication, recombination, modification and repair   |
| PA4324 | hypothetical protein                                                              | Hypothetical, unclassified, unknown                       |
| PA4328 | hypothetical protein                                                              | Hypothetical, unclassified, unknown                       |
| PA4329 | pyruvate kinase II                                                                | Energy metabolism                                         |
| PA4348 | conserved hypothetical protein                                                    | Hypothetical, unclassified, unknown                       |
| PA4351 | probable acyltransferase                                                          | Fatty acid and phospholipid metabolism                    |
| PA4352 | conserved hypothetical protein                                                    | Hypothetical, unclassified, unknown                       |
| PA4357 | conserved hypothetical protein                                                    | Hypothetical, unclassified, unknown                       |
| PA4358 | probable ferrous iron transport protein                                           | Membrane proteins                                         |
| PA4377 | hypothetical protein                                                              | Hypothetical, unclassified, unknown                       |
| PA4394 | conserved hypothetical protein                                                    | Hypothetical, unclassified, unknown                       |
| PA4433 | 50S ribosomal protein L13                                                         | Translation, post-translational modification, degradation |
| PA4436 | probable transcriptional regulator                                                | Transcriptional regulators                                |
| PA4496 | probable binding protein component of ABC transporter                             | Transport of small molecules                              |
| PA4497 | probable binding protein component of ABC transporter                             | Transport of small molecules                              |
| PA4498 | probable metallopeptidase                                                         | Translation, post-translational modification, degradation |
| PA4500 | probable binding protein component of ABC transporter                             | Transport of small molecules                              |
| PA4502 | probable binding protein component of ABC transporter                             | Transport of small molecules                              |
| PA4503 | probable permease of ABC transporter                                              | Membrane proteins                                         |
| PA4504 | probable permease of ABC transporter                                              | Membrane proteins                                         |
| PA4505 | probable ATP-binding component of ABC transporter                                 | Transport of small molecules                              |
| PA4506 | probable ATP-binding component of ABC dipeptide transporter                       | Transport of small molecules                              |
| PA4520 | probable chemotaxis transducer                                                    | Adaptation, Protection                                    |
| PA4569 | octaprenyl-diphosphate synthase                                                   | Energy metabolism                                         |
| PA4577 | hypothetical protein                                                              | Hypothetical, unclassified, unknown                       |
| PA4588 | glutamate dehydrogenase                                                           | Amino acid biosynthesis and metabolism                    |
| PA4596 | probable transcriptional regulator                                                | Transcriptional regulators                                |
| PA4606 | conserved hypothetical protein                                                    | Adaptation, Protection                                    |
| PA4611 | hypothetical protein                                                              | Hypothetical, unclassified, unknown                       |
| PA4632 | hypothetical protein                                                              | Hypothetical, unclassified, unknown                       |
| PA4633 | probable chemotaxis transducer                                                    | Adaptation, Protection                                    |
| PA4654 | probable major facilitator superfamily (MFS) transporter                          | Membrane proteins                                         |
| PA4676 | probable carbonic anhydrase                                                       | Putative enzymes                                          |
| PA4677 | hypothetical protein                                                              | Hypothetical, unclassified, unknown                       |
| PA4681 | hypothetical protein                                                              | Hypothetical, unclassified, unknown                       |
| PA4682 | hypothetical protein                                                              | Hypothetical, unclassified, unknown                       |
| PA4683 | hypothetical protein                                                              | Hypothetical, unclassified, unknown                       |
| PA4695 | acetolactate synthase isozyme III small subunit                                   | Biosynthesis of cofactors, prosthetic groups and carriers |
| PA4715 | probable aminotransferase                                                         | Putative enzymes                                          |
| PA4733 | acetyl-coenzyme A synthetase                                                      | Carbon compound catabolism                                |
| PA4757 | conserved hypothetical protein                                                    | Membrane proteins                                         |
| PA4758 | carbamoyl-phosphate synthase small chain                                          | Amino acid biosynthesis and metabolism                    |
| PA4759 | dihydrodipicolinate reductase                                                     | Amino acid biosynthesis and metabolism                    |
| PA4770 | L-lactate permease                                                                | Transport of small molecules                              |
| PA4773 | hypothetical protein                                                              | Hypothetical, unclassified, unknown                       |
| PA4779 | hypothetical protein                                                              | Membrane proteins                                         |
| PA4782 | hypothetical protein                                                              | Hypothetical, unclassified, unknown                       |
| PA4808 | L-seryl-tRNA(ser) selenium transferase                                            | Translation, post-translational modification, degradation |
| PA4817 | hypothetical protein                                                              | Hypothetical, unclassified, unknown                       |
| PA4851 | hypothetical protein                                                              | Hypothetical, unclassified, unknown                       |
| PA4852 | conserved hypothetical protein                                                    | Hypothetical, unclassified, unknown                       |
| PA4860 | probable permease of ABC transporter                                              | Membrane proteins                                         |
| PA4862 | probable ATP-binding component of ABC transporter                                 | Transport of small molecules                              |
| PA4867 | urease beta subunit                                                               | Central intermediary metabolism                           |

| ORF    | Product name                                                   | Function class                                            |
|--------|----------------------------------------------------------------|-----------------------------------------------------------|
| PA4884 | hypothetical protein                                           | Hypothetical, unclassified, unknown                       |
| PA4893 | urease accessory protein UreG                                  | Biosynthesis of cofactors, prosthetic groups and carriers |
| PA4894 | hypothetical protein                                           | Membrane proteins                                         |
| PA4899 | probable aldehyde dehydrogenase                                | Putative enzymes                                          |
| PA4901 | benzoylformate decarboxylase                                   | Carbon compound catabolism                                |
| PA4908 | hypothetical protein                                           | Hypothetical, unclassified, unknown                       |
| PA4910 | probable ATP-binding component of ABC transporter              | Transport of small molecules                              |
| PA4911 | probable permease of ABC branched-chain amino acid transporter | Membrane proteins                                         |
| PA4912 | probable permease of ABC branched chain amino acid transporter | Membrane proteins                                         |
| PA4913 | probable binding protein component of ABC transporter          | Transport of small molecules                              |
| PA4943 | probable GTP-binding protein                                   | Putative enzymes                                          |
| PA4979 | probable acyl-CoA dehydrogenase                                | Putative enzymes                                          |
| PA4983 | probable two-component response regulator                      | Transcriptional regulators                                |
| PA4984 | probable transcriptional regulator                             | Transcriptional regulators                                |
| PA4985 | hypothetical protein                                           | Hypothetical, unclassified, unknown                       |
| PA4986 | probable oxidoreductase                                        | Putative enzymes                                          |
| PA4997 | transport protein MsbA                                         | Fatty acid and phospholipid metabolism                    |
| PA5020 | probable acyl-CoA dehydrogenase                                | Putative enzymes                                          |
| PA5025 | homocysteine synthase                                          | Amino acid biosynthesis and metabolism                    |
| PA5027 | hypothetical protein                                           | Hypothetical, unclassified, unknown                       |
| PA5028 | conserved hypothetical protein                                 | Hypothetical, unclassified, unknown                       |
| PA5030 | probable major facilitator superfamily (MFS) transporter       | Membrane proteins                                         |
| PA5051 | arginyl-tRNA synthetase                                        | Translation, post-translational modification, degradation |
| PA5059 | probable transcriptional regulator                             | Transcriptional regulators                                |
| PA5082 | probable binding protein component of ABC transporter          | Transport of small molecules                              |
| PA5096 | probable binding protein component of ABC transporter          | Transport of small molecules                              |
| PA5097 | probable amino acid permease                                   | Membrane proteins                                         |
| PA5098 | histidine ammonia-lyase                                        | Amino acid biosynthesis and metabolism                    |
| PA5106 | conserved hypothetical protein                                 | Hypothetical, unclassified, unknown                       |
| PA5112 | esterase EstA                                                  | Secreted Factors (toxins, enzymes, alginate)              |
| PA5129 | glutaredoxin                                                   | Energy metabolism                                         |
| PA5130 | conserved hypothetical protein                                 | Hypothetical, unclassified, unknown                       |
| PA5137 | hypothetical protein                                           | Hypothetical, unclassified, unknown                       |
| PA5149 | conserved hypothetical protein                                 | Hypothetical, unclassified, unknown                       |
| PA5152 | probable ATP-binding component of ABC transporter              | Transport of small molecules                              |
| PA5153 | probable periplasmic binding protein                           | Transport of small molecules                              |
| PA5154 | probable permease of ABC transporter                           | Membrane proteins                                         |
| PA5155 | probable permease of ABC transporter                           | Membrane proteins                                         |
| PA5161 | dTDP-D-glucose 4,6-dehydratase                                 | Carbon compound catabolism                                |
| PA5162 | dTDP-4-dehydrorhamnose reductase                               | Cell wall / LPS / capsule                                 |
| PA5163 | glucose-1-phosphate thymidyltransferase                        | Cell wall / LPS / capsule                                 |
| PA5164 | dTDP-4-dehydrorhamnose 3,5-epimerase                           | Cell wall / LPS / capsule                                 |
| PA5168 | probable dicarboxylate transporter                             | Membrane proteins                                         |
| PA5169 | probable C4-dicarboxylate transporter                          | Membrane proteins                                         |
| PA5174 | probable beta-ketoacyl synthase                                | Fatty acid and phospholipid metabolism                    |
| PA5180 | conserved hypothetical protein                                 | Hypothetical, unclassified, unknown                       |
| PA5220 | hypothetical protein                                           | Hypothetical, unclassified, unknown                       |
| PA5237 | conserved hypothetical protein                                 | Hypothetical, unclassified, unknown                       |
| PA5240 | thioredoxin                                                    | Translation, post-translational modification, degradation |
| PA5249 | hypothetical protein                                           | Membrane proteins                                         |
| PA5275 | conserved hypothetical protein                                 | Hypothetical, unclassified, unknown                       |
| PA5285 | hypothetical protein                                           | Hypothetical, unclassified, unknown                       |
| PA5286 | conserved hypothetical protein                                 | Hypothetical, unclassified, unknown                       |
| PA5288 | nitrogen regulatory protein P-II 2                             | Central intermediary metabolism                           |
| PA5289 | hypothetical protein                                           | Hypothetical, unclassified, unknown                       |
| PA5297 | pyruvate dehydrogenase (cytochrome)                            | Central intermediary metabolism                           |
| PA5303 | conserved hypothetical protein                                 | Hypothetical, unclassified, unknown                       |
| PA5309 | probable oxidoreductase                                        | Putative enzymes                                          |
| PA5324 | probable transcriptional regulator                             | Transcriptional regulators                                |
| PA5325 | hypothetical protein                                           | Hypothetical, unclassified, unknown                       |
| PA5328 | probable cytochrome c (mono-heme type)                         | Energy metabolism                                         |
| PA5329 | conserved hypothetical protein                                 | Hypothetical, unclassified, unknown                       |
| PA5338 | guanosine-3',5'-bis(diphosphate) 3'-pyrophosphohydrolase       | Nucleotide biosynthesis and metabolism                    |
| PA5344 | probable transcriptional regulator                             | Transcriptional regulators                                |
| PA5348 | probable DNA-binding protein                                   | DNA replication, recombination, modification and repair   |
| PA5351 | Rubredoxin 1                                                   | Carbon compound catabolism                                |
| PA5353 | glycolate oxidase subunit GlcF                                 | Central intermediary metabolism                           |
| PA5355 | glycolate oxidase subunit GlcD                                 | Central intermediary metabolism                           |

Supplementary Table 3

| ORF    | Product name                                              | Function class                      |
|--------|-----------------------------------------------------------|-------------------------------------|
| PA5380 | GbdR                                                      | Transcriptional regulators          |
| PA5381 | hypothetical protein                                      | Hypothetical, unclassified, unknown |
| PA5400 | probable electron transfer flavoprotein alpha subunit     | Energy metabolism                   |
| PA5409 | hypothetical protein                                      | Membrane proteins                   |
| PA5427 | alcohol dehydrogenase                                     | Energy metabolism                   |
| PA5434 | tryptophan permease                                       | Membrane proteins                   |
| PA5435 | probable transcarboxylase subunit                         | Central intermediary metabolism     |
| PA5436 | probable biotin carboxylase subunit of a transcarboxylase | Central intermediary metabolism     |
| PA5442 | conserved hypothetical protein                            | Membrane proteins                   |
| PA5445 | probable coenzyme A transferase                           | Putative enzymes                    |
| PA5451 | membrane subunit of A-band LPS efflux transporter         | Cell wall / LPS / capsule           |
| PA5452 | phosphomannose isomerase/GDP-mannose WbpW                 | Cell wall / LPS / capsule           |
| PA5461 | hypothetical protein                                      | Hypothetical, unclassified, unknown |
| PA5475 | hypothetical protein                                      | Hypothetical, unclassified, unknown |
| PA5491 | probable cytochrome                                       | Energy metabolism                   |
| PA5506 | hypothetical protein                                      | Hypothetical, unclassified, unknown |
| PA5507 | hypothetical protein                                      | Hypothetical, unclassified, unknown |
| PA5508 | probable glutamine synthetase                             | Putative enzymes                    |
| PA5509 | hypothetical protein                                      | Hypothetical, unclassified, unknown |
| PA5510 | probable transporter                                      | Membrane proteins                   |
| PA5522 | probable glutamine synthetase                             | Putative enzymes                    |
| PA5523 | probable aminotransferase                                 | Putative enzymes                    |
| PA5533 | hypothetical protein                                      | Hypothetical, unclassified, unknown |
| PA5536 | conserved hypothetical protein                            | Hypothetical, unclassified, unknown |
| PA5542 | hypothetical protein                                      | Putative enzymes                    |
| PA5543 | hypothetical protein                                      | Hypothetical, unclassified, unknown |
| PA5544 | conserved hypothetical protein                            | Membrane proteins                   |
| PA5545 | conserved hypothetical protein                            | Hypothetical, unclassified, unknown |
| PA5546 | conserved hypothetical protein                            | Putative enzymes                    |

| ORF                     | Product name                                        | Function class                                            |
|-------------------------|-----------------------------------------------------|-----------------------------------------------------------|
| <b>Oxidative stress</b> |                                                     |                                                           |
| PA0007                  | hypothetical protein                                | Membrane proteins                                         |
| PA0069                  | conserved hypothetical protein                      | Hypothetical, unclassified, unknown                       |
| PA0105                  | cytochrome c oxidase, subunit II                    | Energy metabolism                                         |
| PA0106                  | cytochrome c oxidase, subunit I                     | Energy metabolism                                         |
| PA0107                  | conserved hypothetical protein                      | Energy metabolism                                         |
| PA0109                  | hypothetical protein                                | Membrane proteins                                         |
| PA0122                  | conserved hypothetical protein                      | Hypothetical, unclassified, unknown                       |
| PA0128                  | conserved hypothetical protein                      | Hypothetical, unclassified, unknown                       |
| PA0158                  | RND; triclosan efflux transporter, TriC             | Antibiotic resistance and susceptibility                  |
| PA0171                  | hypothetical protein                                | Motility & Attachment                                     |
| PA0173                  | probable methyltransferase                          | Adaptation, Protection                                    |
| PA0174                  | conserved hypothetical protein                      | Hypothetical, unclassified, unknown                       |
| PA0176                  | aerotaxis transducer Aer2                           | Adaptation, Protection                                    |
| PA0177                  | probable purine-binding chemotaxis protein          | Adaptation, Protection                                    |
| PA0178                  | probable two-component sensor                       | Chemotaxis                                                |
| PA0179                  | probable two-component response regulator           | Chemotaxis                                                |
| PA0182                  | probable short-chain dehydrogenase                  | Putative enzymes                                          |
| PA0250                  | conserved hypothetical protein                      | Hypothetical, unclassified, unknown                       |
| PA0280                  | sulfate transport protein CysA                      | Transport of small molecules                              |
| PA0281                  | sulfate transport protein CysW                      | Membrane proteins                                         |
| PA0282                  | sulfate transport protein CysT                      | Membrane proteins                                         |
| PA0283                  | sulfate-binding protein precursor                   | Transport of small molecules                              |
| PA0335                  | hypothetical protein                                | Hypothetical, unclassified, unknown                       |
| PA0337                  | phosphoenolpyruvate-protein phosphotransferase PtsP | Transport of small molecules                              |
| PA0352                  | probable transporter                                | Membrane proteins                                         |
| PA0382                  | DNA mismatch repair protein MicA                    | DNA replication, recombination, modification and repair   |
| PA0385                  | hypothetical protein                                | Hypothetical, unclassified, unknown                       |
| PA0459                  | probable ClpA/B protease ATP binding subunit        | Translation, post-translational modification, degradation |
| PA0492                  | conserved hypothetical protein                      | Hypothetical, unclassified, unknown                       |
| PA0493                  | probable biotin-requiring enzyme                    | Putative enzymes                                          |
| PA0494                  | probable acyl-CoA carboxylase subunit               | Putative enzymes                                          |
| PA0495                  | hypothetical protein                                | Hypothetical, unclassified, unknown                       |
| PA0555                  | fructose-1,6-bisphosphate aldolase                  | Central intermediary metabolism                           |
| PA0582                  | dihydroneopterin aldolase                           | Biosynthesis of cofactors, prosthetic groups and carriers |
| PA0586                  | conserved hypothetical protein                      | Hypothetical, unclassified, unknown                       |
| PA0587                  | conserved hypothetical protein                      | Hypothetical, unclassified, unknown                       |
| PA0612                  | repressor, PtrB                                     | Transcriptional regulators                                |
| PA0613                  | hypothetical protein                                | Hypothetical, unclassified, unknown                       |
| PA0614                  | hypothetical protein                                | Hypothetical, unclassified, unknown                       |
| PA0615                  | hypothetical protein                                | Hypothetical, unclassified, unknown                       |
| PA0616                  | hypothetical protein                                | Related to phage, transposon, or plasmid                  |
| PA0617                  | probable bacteriophage protein                      | Related to phage, transposon, or plasmid                  |
| PA0618                  | probable bacteriophage protein                      | Related to phage, transposon, or plasmid                  |
| PA0619                  | probable bacteriophage protein                      | Related to phage, transposon, or plasmid                  |
| PA0620                  | probable bacteriophage protein                      | Related to phage, transposon, or plasmid                  |
| PA0621                  | conserved hypothetical protein                      | Related to phage, transposon, or plasmid                  |
| PA0622                  | probable bacteriophage protein                      | Related to phage, transposon, or plasmid                  |
| PA0623                  | probable bacteriophage protein                      | Related to phage, transposon, or plasmid                  |
| PA0624                  | hypothetical protein                                | Related to phage, transposon, or plasmid                  |
| PA0625                  | hypothetical protein                                | Related to phage, transposon, or plasmid                  |
| PA0626                  | hypothetical protein                                | Related to phage, transposon, or plasmid                  |
| PA0627                  | conserved hypothetical protein                      | Related to phage, transposon, or plasmid                  |
| PA0628                  | conserved hypothetical protein                      | Related to phage, transposon, or plasmid                  |
| PA0629                  | conserved hypothetical protein                      | Related to phage, transposon, or plasmid                  |
| PA0630                  | hypothetical protein                                | Related to phage, transposon, or plasmid                  |
| PA0631                  | hypothetical protein                                | Related to phage, transposon, or plasmid                  |
| PA0634                  | hypothetical protein                                | Related to phage, transposon, or plasmid                  |
| PA0635                  | hypothetical protein                                | Related to phage, transposon, or plasmid                  |
| PA0636                  | hypothetical protein                                | Related to phage, transposon, or plasmid                  |
| PA0637                  | conserved hypothetical protein                      | Related to phage, transposon, or plasmid                  |
| PA0638                  | probable bacteriophage protein                      | Related to phage, transposon, or plasmid                  |
| PA0639                  | conserved hypothetical protein                      | Related to phage, transposon, or plasmid                  |
| PA0640                  | probable bacteriophage protein                      | Related to phage, transposon, or plasmid                  |
| PA0641                  | probable bacteriophage protein                      | Related to phage, transposon, or plasmid                  |
| PA0642                  | hypothetical protein                                | Related to phage, transposon, or plasmid                  |
| PA0643                  | hypothetical protein                                | Related to phage, transposon, or plasmid                  |

Supplementary Table 3

| ORF      | Product name                                                      | Function class                                            |
|----------|-------------------------------------------------------------------|-----------------------------------------------------------|
| PA0645   | hypothetical protein                                              | Related to phage, transposon, or plasmid                  |
| PA0646   | hypothetical protein                                              | Related to phage, transposon, or plasmid                  |
| PA0669   | probable DNA polymerase alpha chain                               | Putative enzymes                                          |
| PA0670   | hypothetical protein                                              | Hypothetical, unclassified, unknown                       |
| PA0671   | hypothetical protein                                              | Hypothetical, unclassified, unknown                       |
| PA0743   | probable 3-hydroxyisobutyrate dehydrogenase                       | Carbon compound catabolism                                |
| PA0745   | probable enoyl-CoA hydratase/isomerase                            | Putative enzymes                                          |
| PA0746   | probable acyl-CoA dehydrogenase                                   | Putative enzymes                                          |
| PA0747   | probable aldehyde dehydrogenase                                   | Putative enzymes                                          |
| PA0873   | transcriptional regulator PhhR                                    | Transcriptional regulators                                |
| PA0887   | acetyl-coenzyme A synthetase                                      | Carbon compound catabolism                                |
| PA0887.1 | aaa                                                               | Non-coding RNA gene                                       |
| PA0889   | arginine/ornithine transport protein AotQ                         | Membrane proteins                                         |
| PA0905   | RsmA, regulator of secondary metabolites                          | Translation, post-translational modification, degradation |
| PA0915   | conserved hypothetical protein                                    | Hypothetical, unclassified, unknown                       |
| PA0916   | conserved hypothetical protein                                    | Hypothetical, unclassified, unknown                       |
| PA0922   | hypothetical protein                                              | Hypothetical, unclassified, unknown                       |
| PA0975   | probable radical activating enzyme                                | Putative enzymes                                          |
| PA0976   | conserved hypothetical protein                                    | Hypothetical, unclassified, unknown                       |
| PA0983   | conserved hypothetical protein                                    | Hypothetical, unclassified, unknown                       |
| PA0996   | probable coenzyme A ligase                                        | Biosynthesis of cofactors, prosthetic groups and carriers |
| PA1000   | Quinolone signal response protein                                 | Biosynthesis of cofactors, prosthetic groups and carriers |
| PA1001   | anthranilate synthase component I                                 | Adaptation, Protection                                    |
| PA1002   | anthranilate synthase component II                                | Amino acid biosynthesis and metabolism                    |
| PA1041   | probable outer membrane protein precursor                         | Membrane proteins                                         |
| PA1112   | conserved hypothetical protein                                    | Hypothetical, unclassified, unknown                       |
| PA1150   | pyocin S2                                                         | Adaptation, Protection                                    |
| PA1151   | pyocin S2 immunity protein                                        | Adaptation, Protection                                    |
| PA1172   | cytochrome c-type protein NapC                                    | Energy metabolism                                         |
| PA1173   | cytochrome c-type protein NapB precursor                          | Energy metabolism                                         |
| PA1174   | periplasmic nitrate reductase protein NapA                        | Energy metabolism                                         |
| PA1175   | NapD protein of periplasmic nitrate reductase                     | Energy metabolism                                         |
| PA1176   | ferredoxin protein NapF                                           | Energy metabolism                                         |
| PA1177   | periplasmic nitrate reductase protein NapE                        | Energy metabolism                                         |
| PA1228   | hypothetical protein                                              | Hypothetical, unclassified, unknown                       |
| PA1320   | cytochrome o ubiquinol oxidase subunit IV                         | Energy metabolism                                         |
| PA1321   | cytochrome o ubiquinol oxidase protein CyoE                       | Energy metabolism                                         |
| PA1372   | hypothetical protein                                              | Hypothetical, unclassified, unknown                       |
| PA1432   | autoinducer synthesis protein LasI                                | Adaptation, Protection                                    |
| PA1466   | hypothetical protein                                              | Hypothetical, unclassified, unknown                       |
| PA1552   | probable cytochrome c                                             | Energy metabolism                                         |
| PA1553   | probable cytochrome c oxidase subunit                             | Energy metabolism                                         |
| PA1554   | probable cytochrome oxidase subunit (cbb3-type)                   | Energy metabolism                                         |
| PA1574   | conserved hypothetical protein                                    | Hypothetical, unclassified, unknown                       |
| PA1581   | succinate dehydrogenase (C subunit)                               | Energy metabolism                                         |
| PA1582   | succinate dehydrogenase (D subunit)                               | Energy metabolism                                         |
| PA1583   | succinate dehydrogenase (A subunit)                               | Energy metabolism                                         |
| PA1584   | succinate dehydrogenase (B subunit)                               | Energy metabolism                                         |
| PA1634   | potassium-transporting ATPase, B chain                            | Transport of small molecules                              |
| PA1687   | spermidine synthase                                               | Amino acid biosynthesis and metabolism                    |
| PA1759   | probable transcriptional regulator                                | Transcriptional regulators                                |
| PA1760   | probable transcriptional regulator                                | Transcriptional regulators                                |
| PA1776   | ECF sigma factor SigX                                             | Transcriptional regulators                                |
| PA1837   | hypothetical protein                                              | Hypothetical, unclassified, unknown                       |
| PA1845   | hypothetical protein                                              | Hypothetical, unclassified, unknown                       |
| PA1852   | hypothetical protein                                              | Hypothetical, unclassified, unknown                       |
| PA1865   | hypothetical protein                                              | Hypothetical, unclassified, unknown                       |
| PA1930   | probable chemotaxis transducer                                    | Adaptation, Protection                                    |
| PA1946   | binding protein component precursor of ABC ribose transporter     | Transport of small molecules                              |
| PA1951   | hypothetical protein                                              | Hypothetical, unclassified, unknown                       |
| PA2006   | probable major facilitator superfamily (MFS) transporter          | Membrane proteins                                         |
| PA2007   | maleylacetoacetate isomerase                                      | Carbon compound catabolism                                |
| PA2008   | fumarylacetoacetase                                               | Carbon compound catabolism                                |
| PA2009   | homogentisate 1,2-dioxygenase                                     | Carbon compound catabolism                                |
| PA2012   | methylcrotonyl-CoA carboxylase, alpha-subunit (biotin-containing) | Carbon compound catabolism                                |
| PA2288   | hypothetical protein                                              | Hypothetical, unclassified, unknown                       |
| PA2290   | glucose dehydrogenase                                             | Carbon compound catabolism                                |
| PA2321   | gluconokinase                                                     | Energy metabolism                                         |



Supplementary Table 3

| ORF    | Product name                                                           | Function class                                            |
|--------|------------------------------------------------------------------------|-----------------------------------------------------------|
| PA2322 | gluconate permease                                                     | Transport of small molecules                              |
| PA2338 | probable binding protein component of ABC maltose/mannitol transporter | Transport of small molecules                              |
| PA2339 | probable binding-protein-dependent maltose/mannitol transport protein  | Transport of small molecules                              |
| PA2340 | probable binding-protein-dependent maltose/mannitol transport protein  | Transport of small molecules                              |
| PA2341 | probable ATP-binding component of ABC maltose/mannitol transporter     | Transport of small molecules                              |
| PA2342 | mannitol dehydrogenase                                                 | Carbon compound catabolism                                |
| PA2344 | fructokinase                                                           | Carbon compound catabolism                                |
| PA2453 | hypothetical protein                                                   | Hypothetical, unclassified, unknown                       |
| PA2552 | probable acyl-CoA dehydrogenase                                        | Putative enzymes                                          |
| PA2553 | probable acyl-CoA thiolase                                             | Putative enzymes                                          |
| PA2555 | probable AMP-binding enzyme                                            | Putative enzymes                                          |
| PA2557 | probable AMP-binding enzyme                                            | Fatty acid and phospholipid metabolism                    |
| PA2573 | probable chemotaxis transducer                                         | Adaptation, Protection                                    |
| PA2579 | hypothetical protein                                                   | Putative enzymes                                          |
| PA2619 | initiation factor                                                      | Translation, post-translational modification, degradation |
| PA2637 | NADH dehydrogenase I chain A                                           | Energy metabolism                                         |
| PA2638 | NADH dehydrogenase I chain B                                           | Energy metabolism                                         |
| PA2639 | NADH dehydrogenase I chain C,D                                         | Energy metabolism                                         |
| PA2640 | NADH dehydrogenase I chain E                                           | Energy metabolism                                         |
| PA2641 | NADH dehydrogenase I chain F                                           | Energy metabolism                                         |
| PA2642 | NADH dehydrogenase I chain G                                           | Energy metabolism                                         |
| PA2643 | NADH dehydrogenase I chain H                                           | Energy metabolism                                         |
| PA2644 | NADH Dehydrogenase I chain I                                           | Energy metabolism                                         |
| PA2645 | NADH dehydrogenase I chain J                                           | Energy metabolism                                         |
| PA2646 | NADH dehydrogenase I chain K                                           | Energy metabolism                                         |
| PA2647 | NADH dehydrogenase I chain L                                           | Energy metabolism                                         |
| PA2648 | NADH dehydrogenase I chain M                                           | Energy metabolism                                         |
| PA2649 | NADH dehydrogenase I chain N                                           | Energy metabolism                                         |
| PA2653 | probable transporter                                                   | Membrane proteins                                         |
| PA2667 | conserved hypothetical protein                                         | Hypothetical, unclassified, unknown                       |
| PA2730 | hypothetical protein                                                   | Hypothetical, unclassified, unknown                       |
| PA2746 | hypothetical protein                                                   | Membrane proteins                                         |
| PA2911 | probable TonB-dependent receptor                                       | Membrane proteins                                         |
| PA2937 | hypothetical protein                                                   | Hypothetical, unclassified, unknown                       |
| PA3007 | repressor protein LexA                                                 | Adaptation, Protection                                    |
| PA3008 | hypothetical protein                                                   | Hypothetical, unclassified, unknown                       |
| PA3009 | hypothetical protein                                                   | Hypothetical, unclassified, unknown                       |
| PA3080 | hypothetical protein                                                   | Hypothetical, unclassified, unknown                       |
| PA3147 | probable glycosyl transferase WbpJ                                     | Putative enzymes                                          |
| PA3149 | probable glycosyltransferase WbpH                                      | Putative enzymes                                          |
| PA3150 | LPS biosynthesis protein WbpG                                          | Cell wall / LPS / capsule                                 |
| PA3181 | 2-keto-3-deoxy-6-phosphogluconate aldolase                             | Central intermediary metabolism                           |
| PA3183 | glucose-6-phosphate 1-dehydrogenase                                    | Energy metabolism                                         |
| PA3186 | Glucose/carbohydrate outer membrane porin OprB precursor               | Transport of small molecules                              |
| PA3187 | probable ATP-binding component of ABC transporter                      | Transport of small molecules                              |
| PA3188 | probable permease of ABC sugar transporter                             | Transport of small molecules                              |
| PA3189 | probable permease of ABC sugar transporter                             | Transport of small molecules                              |
| PA3190 | probable binding protein component of ABC sugar transporter            | Transport of small molecules                              |
| PA3194 | phosphogluconate dehydratase                                           | Energy metabolism                                         |
| PA3237 | hypothetical protein                                                   | Hypothetical, unclassified, unknown                       |
| PA3282 | hypothetical protein                                                   | Hypothetical, unclassified, unknown                       |
| PA3311 | conserved hypothetical protein                                         | Membrane proteins                                         |
| PA3404 | probable outer membrane protein precursor                              | Protein secretion/export apparatus                        |
| PA3415 | probable dihydrolipoamide acetyltransferase                            | Energy metabolism                                         |
| PA3417 | probable pyruvate dehydrogenase E1 component, alpha subunit            | Energy metabolism                                         |
| PA3418 | leucine dehydrogenase                                                  | Amino acid biosynthesis and metabolism                    |
| PA3441 | probable molybdopterin-binding protein                                 | Transport of small molecules                              |
| PA3442 | probable ATP-binding component of ABC transporter                      | Transport of small molecules                              |
| PA3443 | probable permease of ABC transporter                                   | Membrane proteins                                         |
| PA3444 | conserved hypothetical protein                                         | Putative enzymes                                          |
| PA3445 | conserved hypothetical protein                                         | Hypothetical, unclassified, unknown                       |
| PA3446 | conserved hypothetical protein                                         | Hypothetical, unclassified, unknown                       |
| PA3449 | conserved hypothetical protein                                         | Hypothetical, unclassified, unknown                       |
| PA3496 | hypothetical protein                                                   | Hypothetical, unclassified, unknown                       |
| PA3561 | 1-phosphofructokinase                                                  | Central intermediary metabolism                           |
| PA3574 | probable transcriptional regulator                                     | Transcriptional regulators                                |
| PA3581 | glycerol uptake facilitator protein                                    | Transport of small molecules                              |
| PA3582 | glycerol kinase                                                        | Central intermediary metabolism                           |

| ORF    | Product name                                            | Function class                                            |
|--------|---------------------------------------------------------|-----------------------------------------------------------|
| PA3584 | glycerol-3-phosphate dehydrogenase                      | Central intermediary metabolism                           |
| PA3600 | conserved hypothetical protein                          | Translation, post-translational modification, degradation |
| PA3607 | polyamine transport protein PotA                        | Transport of small molecules                              |
| PA3608 | polyamine transport protein PotB                        | Membrane proteins                                         |
| PA3609 | polyamine transport protein PotC                        | Membrane proteins                                         |
| PA3610 | polyamine transport protein PotD                        | Transport of small molecules                              |
| PA3616 | conserved hypothetical protein                          | Hypothetical, unclassified, unknown                       |
| PA3617 | RecA protein                                            | DNA replication, recombination, modification and repair   |
| PA3621 | ferredoxin I                                            | Energy metabolism                                         |
| PA3672 | probable ATP-binding component of ABC transporter       | Transport of small molecules                              |
| PA3712 | hypothetical protein                                    | Hypothetical, unclassified, unknown                       |
| PA3713 | spermidine dehydrogenase, SpdH                          | Hypothetical, unclassified, unknown                       |
| PA3723 | probable FMN oxidoreductase                             | Putative enzymes                                          |
| PA3753 | conserved hypothetical protein                          | Transport of small molecules                              |
| PA3767 | conserved hypothetical protein                          | Hypothetical, unclassified, unknown                       |
| PA3787 | conserved hypothetical protein                          | Hypothetical, unclassified, unknown                       |
| PA3808 | conserved hypothetical protein                          | Hypothetical, unclassified, unknown                       |
| PA3870 | molybdopterin biosynthetic protein A1                   | Biosynthesis of cofactors, prosthetic groups and carriers |
| PA3871 | probable peptidyl-prolyl cis-trans isomerase, PpiC-type | Translation, post-translational modification, degradation |
| PA3872 | respiratory nitrate reductase gamma chain               | Energy metabolism                                         |
| PA3873 | respiratory nitrate reductase delta chain               | Energy metabolism                                         |
| PA3874 | respiratory nitrate reductase beta chain                | Energy metabolism                                         |
| PA3875 | respiratory nitrate reductase alpha chain               | Energy metabolism                                         |
| PA3876 | nitrite extrusion protein 2                             | Membrane proteins                                         |
| PA3877 | nitrite extrusion protein 1                             | Membrane proteins                                         |
| PA3901 | Fe(III) dicitrate transport protein FecA                | Membrane proteins                                         |
| PA3913 | probable protease                                       | Putative enzymes                                          |
| PA3922 | conserved hypothetical protein                          | Hypothetical, unclassified, unknown                       |
| PA3935 | taurine dioxygenase                                     | Carbon compound catabolism                                |
| PA3967 | hypothetical protein                                    | Hypothetical, unclassified, unknown                       |
| PA3986 | hypothetical protein                                    | Hypothetical, unclassified, unknown                       |
| PA4055 | riboflavin synthase alpha chain                         | Biosynthesis of cofactors, prosthetic groups and carriers |
| PA4131 | probable iron-sulfur protein                            | Putative enzymes                                          |
| PA4132 | conserved hypothetical protein                          | Hypothetical, unclassified, unknown                       |
| PA4133 | cytochrome c oxidase subunit (ccb3-type)                | Energy metabolism                                         |
| PA4141 | hypothetical protein                                    | Hypothetical, unclassified, unknown                       |
| PA4199 | probable acyl-CoA dehydrogenase                         | Putative enzymes                                          |
| PA4236 | catalase                                                | Adaptation, Protection                                    |
| PA4390 | hypothetical protein                                    | Hypothetical, unclassified, unknown                       |
| PA4427 | stringent starvation protein B                          | Adaptation, Protection                                    |
| PA4432 | 30S ribosomal protein S9                                | Translation, post-translational modification, degradation |
| PA4496 | probable binding protein component of ABC transporter   | Transport of small molecules                              |
| PA4553 | type 4 fimbrial biogenesis protein PilX                 | Motility & Attachment                                     |
| PA4563 | 30S ribosomal protein S20                               | Central intermediary metabolism                           |
| PA4573 | hypothetical protein                                    | Hypothetical, unclassified, unknown                       |
| PA4582 | conserved hypothetical protein                          | Hypothetical, unclassified, unknown                       |
| PA4583 | conserved hypothetical protein                          | Hypothetical, unclassified, unknown                       |
| PA4584 | conserved hypothetical protein                          | Hypothetical, unclassified, unknown                       |
| PA4585 | RNA 3'-terminal phosphate cyclase                       | Transcription, RNA processing and degradation             |
| PA4607 | hypothetical protein                                    | Hypothetical, unclassified, unknown                       |
| PA4612 | conserved hypothetical protein                          | Hypothetical, unclassified, unknown                       |
| PA4642 | hypothetical protein                                    | Hypothetical, unclassified, unknown                       |
| PA4645 | probable purine/pyrimidine phosphoribosyl transferase   | Nucleotide biosynthesis and metabolism                    |
| PA4648 | hypothetical protein                                    | Hypothetical, unclassified, unknown                       |
| PA4651 | probable pili assembly chaperone                        | Motility & Attachment                                     |
| PA4672 | peptidyl-tRNA hydrolase                                 | Translation, post-translational modification, degradation |
| PA4687 | ferric iron-binding periplasmic protein HitA            | Transport of small molecules                              |
| PA4688 | iron (III)-transport system permease HitB               | Membrane proteins                                         |
| PA4702 | hypothetical protein                                    | Hypothetical, unclassified, unknown                       |
| PA4703 | hypothetical protein                                    | Hypothetical, unclassified, unknown                       |
| PA4732 | glucose-6-phosphate isomerase                           | Carbon compound catabolism                                |
| PA4746 | conserved hypothetical protein                          | Hypothetical, unclassified, unknown                       |
| PA4747 | secretion protein SecG                                  | Membrane proteins                                         |
| PA4748 | triosephosphate isomerase                               | Central intermediary metabolism                           |
| PA4753 | conserved hypothetical protein                          | Hypothetical, unclassified, unknown                       |
| PA4759 | dihydrodipicolinate reductase                           | Amino acid biosynthesis and metabolism                    |
| PA4763 | DNA repair protein RecN                                 | DNA replication, recombination, modification and repair   |
| PA4839 | biosynthetic arginine decarboxylase                     | Amino acid biosynthesis and metabolism                    |

Supplementary Table 3

| ORF    | Product name                                              | Function class                                            |
|--------|-----------------------------------------------------------|-----------------------------------------------------------|
| PA4840 | conserved hypothetical protein                            | Hypothetical, unclassified, unknown                       |
| PA4843 | probable two-component response regulator                 | Transcriptional regulators                                |
| PA5024 | conserved hypothetical protein                            | Hypothetical, unclassified, unknown                       |
| PA5049 | 50S ribosomal protein L31                                 | Translation, post-translational modification, degradation |
| PA5074 | probable ATP-binding component of ABC transporter         | Transport of small molecules                              |
| PA5167 | probable c4-dicarboxylate-binding protein                 | Membrane proteins                                         |
| PA5235 | glycerol-3-phosphate transporter                          | Membrane proteins                                         |
| PA5351 | Rubredoxin 1                                              | Carbon compound catabolism                                |
| PA5380 | GbdR                                                      | Transcriptional regulators                                |
| PA5401 | hypothetical protein                                      | Hypothetical, unclassified, unknown                       |
| PA5436 | probable biotin carboxylase subunit of a transcarboxylase | Central intermediary metabolism                           |
| PA5446 | hypothetical protein                                      | Hypothetical, unclassified, unknown                       |
| PA5452 | phosphomannose isomerase/GDP-mannose WbpW                 | Cell wall / LPS / capsule                                 |
| PA5453 | GDP-mannose 4,6-dehydratase                               | Cell wall / LPS / capsule                                 |
| PA5465 | hypothetical protein                                      | Hypothetical, unclassified, unknown                       |
| PA5470 | probable peptide chain release factor                     | Translation, post-translational modification, degradation |
| PA5471 | hypothetical protein                                      | Hypothetical, unclassified, unknown                       |
| PA5479 | proton-glutamate symporter                                | Membrane proteins                                         |

| ORF        | Product name                                                                          | Function class                                            |
|------------|---------------------------------------------------------------------------------------|-----------------------------------------------------------|
| <b>PCP</b> |                                                                                       |                                                           |
| PA0224     | probable aldolase                                                                     | Putative enzymes                                          |
| PA0246     | probable major facilitator superfamily (MFS) transporter                              | Membrane proteins                                         |
| PA0263     | secreted protein Hcp                                                                  | Secreted Factors (toxins, enzymes, alginate)              |
| PA0355     | protease PfpI                                                                         | Translation, post-translational modification, degradation |
| PA0417     | probable chemotaxis protein                                                           | Chemotaxis                                                |
| PA0425     | RND multidrug efflux membrane fusion protein MexA precursor                           | Transport of small molecules                              |
| PA0426     | RND multidrug efflux transporter MexB                                                 | Transport of small molecules                              |
| PA0427     | Major intrinsic multiple antibiotic resistance efflux outer membrane protein OprM pre | Antibiotic resistance and susceptibility                  |
| PA0445     | probable transposase                                                                  | Related to phage, transposon, or plasmid                  |
| PA0526     | hypothetical protein                                                                  | Hypothetical, unclassified, unknown                       |
| PA0579     | 30S ribosomal protein S21                                                             | Translation, post-translational modification, degradation |
| PA0726     | hypothetical protein of bacteriophage Pf1                                             | Hypothetical, unclassified, unknown                       |
| PA0868     | conserved hypothetical protein                                                        | Hypothetical, unclassified, unknown                       |
| PA1178     | PhoP/Q and low Mg <sup>2+</sup> inducible outer membrane protein HI precursor         | Membrane proteins                                         |
| PA1198     | conserved hypothetical protein                                                        | Hypothetical, unclassified, unknown                       |
| PA1281     | cobalamin (5'-phosphate) synthase                                                     | Biosynthesis of cofactors, prosthetic groups and carriers |
| PA1393     | adenosine 5'-phosphosulfate (APS) kinase                                              | Amino acid biosynthesis and metabolism                    |
| PA1493     | sulfate-binding protein of ABC transporter                                            | Transport of small molecules                              |
| PA1588     | succinyl-CoA synthetase beta chain                                                    | Energy metabolism                                         |
| PA1656     | hypothetical protein                                                                  | Hypothetical, unclassified, unknown                       |
| PA1658     | conserved hypothetical protein                                                        | Hypothetical, unclassified, unknown                       |
| PA1660     | hypothetical protein                                                                  | Hypothetical, unclassified, unknown                       |
| PA1664     | hypothetical protein                                                                  | Hypothetical, unclassified, unknown                       |
| PA1780     | assimilatory nitrite reductase small subunit                                          | Central intermediary metabolism                           |
| PA2062     | probable pyridoxal-phosphate dependent enzyme                                         | Putative enzymes                                          |
| PA2562     | hypothetical protein                                                                  | Hypothetical, unclassified, unknown                       |
| PA2658     | hypothetical protein                                                                  | Hypothetical, unclassified, unknown                       |
| PA2669     | hypothetical protein                                                                  | Hypothetical, unclassified, unknown                       |
| PA2906     | probable oxidoreductase                                                               | Putative enzymes                                          |
| PA2941     | hypothetical protein                                                                  | Hypothetical, unclassified, unknown                       |
| PA2951     | electron transfer flavoprotein alpha-subunit                                          | Energy metabolism                                         |
| PA3136     | probable secretion protein                                                            | Transport of small molecules                              |
| PA3137     | probable major facilitator superfamily (MFS) transporter                              | Membrane proteins                                         |
| PA3159     | probable UDP-glucose/GDP-mannose dehydrogenase WbpA                                   | Putative enzymes                                          |
| PA3162     | 30S ribosomal protein S1                                                              | Translation, post-translational modification, degradation |
| PA3266     | cold acclimation protein B                                                            | Transcriptional regulators                                |
| PA3547     | poly(beta-d-mannuronate) lyase precursor AlgL                                         | Cell wall / LPS / capsule                                 |
| PA3552     | ArnB                                                                                  | Cell wall / LPS / capsule                                 |
| PA3676     | probable Resistance-Nodulation-Cell Division (RND) efflux transporter                 | Membrane proteins                                         |
| PA3677     | probable RND efflux membrane fusion protein precursor                                 | Transport of small molecules                              |
| PA3678     | probable transcriptional regulator                                                    | Transcriptional regulators                                |
| PA3679     | hypothetical protein                                                                  | Hypothetical, unclassified, unknown                       |
| PA3719     | hypothetical protein                                                                  | Hypothetical, unclassified, unknown                       |
| PA3720     | hypothetical protein                                                                  | Hypothetical, unclassified, unknown                       |
| PA3721     | probable transcriptional regulator                                                    | Transcriptional regulators                                |
| PA3814     | L-cysteine desulfurase (pyridoxal phosphate-dependent)                                | Amino acid biosynthesis and metabolism                    |
| PA3815     | conserved hypothetical protein                                                        | Hypothetical, unclassified, unknown                       |
| PA3819     | conserved hypothetical protein                                                        | Membrane proteins                                         |
| PA3905     | hypothetical protein                                                                  | Hypothetical, unclassified, unknown                       |
| PA4033     | hypothetical protein                                                                  | Hypothetical, unclassified, unknown                       |
| PA4037     | probable ATP-binding component of ABC transporter                                     | Transport of small molecules                              |
| PA4053     | 6,7-dimethyl-8-ribityllumazine synthase                                               | Biosynthesis of cofactors, prosthetic groups and carriers |
| PA4178     | hypothetical protein                                                                  | Hypothetical, unclassified, unknown                       |
| PA4344     | probable hydrolase                                                                    | Putative enzymes                                          |
| PA4386     | GroES protein                                                                         | Chaperones & heat shock proteins                          |
| PA4443     | ATP sulfurylase small subunit                                                         | Central intermediary metabolism                           |
| PA4568     | 50S ribosomal protein L21                                                             | Translation, post-translational modification, degradation |
| PA4816     | hypothetical protein                                                                  | Hypothetical, unclassified, unknown                       |
| PA4847     | biotin carboxyl carrier protein (BCCP)                                                | Fatty acid and phospholipid metabolism                    |
| PA5013     | branched-chain amino acid transferase                                                 | Amino acid biosynthesis and metabolism                    |
| PA5157     | probable transcriptional regulator                                                    | Transcriptional regulators                                |
| PA5158     | probable outer membrane protein precursor                                             | Transport of small molecules                              |
| PA5159     | multidrug resistance protein                                                          | Transport of small molecules                              |
| PA5160     | drug efflux transporter                                                               | Membrane proteins                                         |
| PA5182     | hypothetical protein                                                                  | Membrane proteins                                         |

| <b>ORF</b> | <b>Product name</b>                                                    | <b>Function class</b>               |
|------------|------------------------------------------------------------------------|-------------------------------------|
| PA5212     | hypothetical protein                                                   | Hypothetical, unclassified, unknown |
| PA5216     | probable permease of ABC iron transporter                              | Membrane proteins                   |
| PA5253     | alginate regulatory protein AlgP                                       | Transcriptional regulators          |
| PA5312     | probable aldehyde dehydrogenase                                        | Putative enzymes                    |
| PA5326     | hypothetical protein                                                   | Hypothetical, unclassified, unknown |
| PA5369     | phosphate ABC transporter, periplasmic phosphate-binding protein, PstS | Transport of small molecules        |
| PA5390     | probable peptidic bond hydrolase                                       | Putative enzymes                    |
| PA5481     | hypothetical protein                                                   | Hypothetical, unclassified, unknown |
| PA5570     | 50S ribosomal protein L34                                              | Central intermediary metabolism     |

| ORF           | Product name                                                            | Function class                                            |
|---------------|-------------------------------------------------------------------------|-----------------------------------------------------------|
| <b>Copper</b> |                                                                         |                                                           |
| PA0149        | probable sigma-70 factor, ECF subfamily                                 | Transcriptional regulators                                |
| PA0150        | probable transmembrane sensor                                           | Membrane proteins                                         |
| PA0397        | probable cation efflux system protein                                   | Transport of small molecules                              |
| PA0423        | PasP                                                                    | Secreted Factors (toxins, enzymes, alginate)              |
| PA0450        | probable phosphate transporter                                          | Membrane proteins                                         |
| PA0802        | hypothetical protein                                                    | Membrane proteins                                         |
| PA0913        | probable Mg transporter MgtE                                            | Transport of small molecules                              |
| PA0918        | cytochrome b561                                                         | Energy metabolism                                         |
| PA0931        | ferric enterobactin receptor PirA                                       | Transport of small molecules                              |
| PA1134        | hypothetical protein                                                    | Hypothetical, unclassified, unknown                       |
| PA1286        | probable major facilitator superfamily (MFS) transporter                | Membrane proteins                                         |
| PA1297        | probable metal transporter                                              | Membrane proteins                                         |
| PA1301        | probable transmembrane sensor                                           | Membrane proteins                                         |
| PA1302        | probable heme utilization protein precursor                             | Membrane proteins                                         |
| PA1363        | probable sigma-70 factor, ECF subfamily                                 | Transcriptional regulators                                |
| PA1364        | probable transmembrane sensor                                           | Membrane proteins                                         |
| PA1365        | probable siderophore receptor                                           | Transport of small molecules                              |
| PA1390        | probable glycosyl transferase                                           | Putative enzymes                                          |
| PA1435        | RND efflux membrane fusion protein precursor                            | Transport of small molecules                              |
| PA1436        | probable RND efflux transporter                                         | Membrane proteins                                         |
| PA1437        | probable two-component response regulator                               | Transcriptional regulators                                |
| PA1438        | probable two-component sensor                                           | Two-component regulatory systems                          |
| PA1562        | aconitate hydratase 1                                                   | Energy metabolism                                         |
| PA1909        | hypothetical protein                                                    | Hypothetical, unclassified, unknown                       |
| PA1910        | probable tonB-dependent receptor protein                                | Transport of small molecules                              |
| PA1911        | probable transmembrane sensor                                           | Membrane proteins                                         |
| PA1912        | probable sigma-70 factor, ECF subfamily                                 | Transcriptional regulators                                |
| PA2064        | copper resistance protein B precursor                                   | Adaptation, Protection                                    |
| PA2065        | copper resistance protein A precursor                                   | Adaptation, Protection                                    |
| PA2277        | ArsR protein                                                            | Transcriptional regulators                                |
| PA2278        | ArsB protein                                                            | Membrane proteins                                         |
| PA2279        | ArsC protein                                                            | Adaptation, Protection                                    |
| PA2384        | hypothetical protein                                                    | Hypothetical, unclassified, unknown                       |
| PA2390        | probable ATP-binding/permease fusion ABC transporter                    | Membrane proteins                                         |
| PA2391        | probable outer membrane protein precursor                               | Membrane proteins                                         |
| PA2395        | PvdO                                                                    | Adaptation, Protection                                    |
| PA2406        | hypothetical protein                                                    | Hypothetical, unclassified, unknown                       |
| PA2451        | hypothetical protein                                                    | Hypothetical, unclassified, unknown                       |
| PA2466        | Ferrioxamine receptor FoxA                                              | Transport of small molecules                              |
| PA2467        | Anti-sigma factor FoxR                                                  | Membrane proteins                                         |
| PA2476        | thiol:disulfide interchange protein DsbG                                | Translation, post-translational modification, degradation |
| PA2477        | probable thiol:disulfide interchange protein                            | Membrane proteins                                         |
| PA2478        | probable thiol:disulfide interchange protein                            | Membrane proteins                                         |
| PA2479        | probable two-component response regulator                               | Transcriptional regulators                                |
| PA2480        | probable two-component sensor                                           | Two-component regulatory systems                          |
| PA2520        | RND divalent metal cation efflux transporter CzcA                       | Membrane proteins                                         |
| PA2521        | RND divalent metal cation efflux membrane fusion protein CzcB precursor | Membrane proteins                                         |
| PA2522        | outer membrane protein precursor CzcC                                   | Membrane proteins                                         |
| PA2524        | probable two-component sensor                                           | Two-component regulatory systems                          |
| PA2664        | flavo-hemoprotein                                                       | Energy metabolism                                         |
| PA2686        | two-component response regulator PfeR                                   | Transcriptional regulators                                |
| PA2688        | Ferric enterobactin receptor, outer membrane protein PfeA precursor     | Membrane proteins                                         |
| PA2807        | hypothetical protein                                                    | Hypothetical, unclassified, unknown                       |
| PA2809        | two-component response regulator, CopR                                  | Transcriptional regulators                                |
| PA2810        | two-component sensor, CopS                                              | Two-component regulatory systems                          |
| PA2826        | probable glutathione peroxidase                                         | Adaptation, Protection                                    |
| PA2953        | electron transfer flavoprotein-ubiquinone oxidoreductase                | Energy metabolism                                         |
| PA3392        | nitrous-oxide reductase precursor                                       | Energy metabolism                                         |
| PA3407        | heme acquisition protein HasAp                                          | Transport of small molecules                              |
| PA3408        | Haem uptake outer membrane receptor HasR precursor                      | Transport of small molecules                              |
| PA3409        | probable transmembrane sensor                                           | Membrane proteins                                         |
| PA3410        | probable sigma-70 factor, ECF subfamily                                 | Transcriptional regulators                                |
| PA3411        | hypothetical protein                                                    | Hypothetical, unclassified, unknown                       |
| PA3412        | hypothetical protein                                                    | Hypothetical, unclassified, unknown                       |
| PA3521        | probable outer membrane protein precursor                               | Membrane proteins                                         |

Supplementary Table 3

| ORF    | Product name                                                          | Function class                                            |
|--------|-----------------------------------------------------------------------|-----------------------------------------------------------|
| PA3522 | probable Resistance-Nodulation-Cell Division (RND) efflux transporter | Membrane proteins                                         |
| PA3530 | conserved hypothetical protein                                        | Hypothetical, unclassified, unknown                       |
| PA3601 | conserved hypothetical protein                                        | Translation, post-translational modification, degradation |
| PA3602 | conserved hypothetical protein                                        | Membrane proteins                                         |
| PA3749 | probable major facilitator superfamily (MFS) transporter              | Membrane proteins                                         |
| PA3920 | probable metal transporting P-type ATPase                             | Membrane proteins                                         |
| PA3921 | probable transcriptional regulator                                    | Transcriptional regulators                                |
| PA4158 | ferric enterobactin transport protein FepC                            | Transport of small molecules                              |
| PA4159 | ferriterobactin-binding periplasmic protein precursor FepB            | Transport of small molecules                              |
| PA4160 | ferric enterobactin transport protein FepD                            | Membrane proteins                                         |
| PA4192 | probable ATP-binding component of ABC transporter                     | Transport of small molecules                              |
| PA4194 | probable permease of ABC transporter                                  | Membrane proteins                                         |
| PA4195 | probable binding protein component of ABC transporter                 | Transport of small molecules                              |
| PA4513 | probable oxidoreductase                                               | Putative enzymes                                          |
| PA4514 | probable outer membrane receptor for iron transport                   | Transport of small molecules                              |
| PA4515 | conserved hypothetical protein                                        | Hypothetical, unclassified, unknown                       |
| PA4655 | ferrochelatase                                                        | Biosynthesis of cofactors, prosthetic groups and carriers |
| PA4675 | probable TonB-dependent receptor                                      | Transport of small molecules                              |
| PA4705 | hypothetical protein                                                  | Hypothetical, unclassified, unknown                       |
| PA4706 | probable ATP-binding component of ABC transporter                     | Transport of small molecules                              |
| PA4707 | probable permease of ABC transporter                                  | Membrane proteins                                         |
| PA4711 | hypothetical protein                                                  | Hypothetical, unclassified, unknown                       |
| PA4818 | conserved hypothetical protein                                        | Membrane proteins                                         |
| PA4819 | probable glycosyl transferase                                         | Putative enzymes                                          |
| PA4820 | hypothetical protein                                                  | Hypothetical, unclassified, unknown                       |
| PA4825 | Mg(2+) transport ATPase, P-type 2                                     | Transport of small molecules                              |
| PA5230 | probable permease of ABC transporter                                  | Membrane proteins                                         |
| PA5231 | probable ATP-binding/permease fusion ABC transporter                  | Membrane proteins                                         |
| PA5300 | cytochrome c5                                                         | Energy metabolism                                         |
| PA5304 | D-amino acid dehydrogenase, small subunit                             | Energy metabolism                                         |
| PA5531 | TonB protein                                                          | Transport of small molecules                              |

| ORF            | Product name                                             | Function class                      |
|----------------|----------------------------------------------------------|-------------------------------------|
| <b>Sulfate</b> |                                                          |                                     |
| PA0192         | probable TonB-dependent receptor                         | Membrane proteins                   |
| PA0193         | hypothetical protein                                     | Putative enzymes                    |
| PA0194         | hypothetical protein                                     | Putative enzymes                    |
| PA0197         | hypothetical protein                                     | Transport of small molecules        |
| PA0198         | transport protein ExbB                                   | Transport of small molecules        |
| PA0199         | transport protein ExbD                                   | Transport of small molecules        |
| PA2085         | probable ring-hydroxylating dioxygenase small subunit    | Carbon compound catabolism          |
| PA2086         | probable epoxide hydrolase                               | Carbon compound catabolism          |
| PA2092         | probable major facilitator superfamily (MFS) transporter | Membrane proteins                   |
| PA2292         | hypothetical protein                                     | Hypothetical, unclassified, unknown |
| PA2293         | hypothetical protein                                     | Hypothetical, unclassified, unknown |
| PA2294         | probable ATP-binding component of ABC transporter        | Transport of small molecules        |
| PA2295         | probable permease of ABC transporter                     | Membrane proteins                   |
| PA2296         | hypothetical protein                                     | Hypothetical, unclassified, unknown |
| PA2297         | probable ferredoxin                                      | Energy metabolism                   |
| PA2298         | probable oxidoreductase                                  | Putative enzymes                    |
| PA2324         | hypothetical protein                                     | Putative enzymes                    |
| PA2325         | hypothetical protein                                     | Putative enzymes                    |
| PA2326         | hypothetical protein                                     | Putative enzymes                    |
| PA2346         | conserved hypothetical protein                           | Putative enzymes                    |
| PA2347         | hypothetical protein                                     | Putative enzymes                    |
| PA2348         | conserved hypothetical protein                           | Putative enzymes                    |
| PA2349         | conserved hypothetical protein                           | Hypothetical, unclassified, unknown |
| PA2350         | probable ATP-binding component of ABC transporter        | Transport of small molecules        |
| PA2351         | probable permease of ABC transporter                     | Membrane proteins                   |
| PA2354         | probable transcriptional regulator                       | Transcriptional regulators          |
| PA2355         | probable FMNH <sub>2</sub> -dependent monooxygenase      | Putative enzymes                    |
| PA2356         | methanesulfonate sulfonate MsuD                          | Carbon compound catabolism          |
| PA2357         | NADH-dependent FMN reductase MsuE                        | Carbon compound catabolism          |



| ORF                  | Product name                                         | Function class                                            |
|----------------------|------------------------------------------------------|-----------------------------------------------------------|
| <b>Osmotic shock</b> |                                                      |                                                           |
| PA0236               | probable transcriptional regulator                   | Transcriptional regulators                                |
| PA0448               | probable transcriptional regulator                   | Transcriptional regulators                                |
| PA1159               | probable cold-shock protein                          | Transcriptional regulators                                |
| PA1226               | probable transcriptional regulator                   | Transcriptional regulators                                |
| PA1243               | probable sensor/response regulator hybrid            | Two-component regulatory systems                          |
| PA1690               | translocation protein in type III secretion          | Protein secretion/export apparatus                        |
| PA1692               | probable translocation protein in type III secretion | Protein secretion/export apparatus                        |
| PA1693               | translocation protein in type III secretion          | Protein secretion/export apparatus                        |
| PA1694               | translocation protein in type III secretion          | Protein secretion/export apparatus                        |
| PA1695               | translocation protein in type III secretion          | Protein secretion/export apparatus                        |
| PA1697               | ATP synthase in type III secretion system            | Protein secretion/export apparatus                        |
| PA1702               | conserved hypothetical protein in type III secretion | Protein secretion/export apparatus                        |
| PA1703               | type III secretory apparatus protein PcrD            | Protein secretion/export apparatus                        |
| PA1704               | transcriptional regulator protein PcrR               | Transcriptional regulators                                |
| PA1724               | type III export protein PscK                         | Protein secretion/export apparatus                        |
| PA1725               | type III export protein PscL                         | Protein secretion/export apparatus                        |
| PA2147               | catalase HPII                                        | Adaptation, Protection                                    |
| PA2152               | probable trehalose synthase                          | Putative enzymes                                          |
| PA2417               | probable transcriptional regulator                   | Transcriptional regulators                                |
| PA2665               | probable transcriptional regulator                   | Transcriptional regulators                                |
| PA3049               | ribosome modulation factor                           | Translation, post-translational modification, degradation |
| PA3459               | probable glutamine amidotransferase                  | Amino acid biosynthesis and metabolism                    |
| PA3462               | probable sensor/response regulator hybrid            | Two-component regulatory systems                          |
| PA3689               | probable transcriptional regulator                   | Transcriptional regulators                                |
| PA3831               | leucine aminopeptidase                               | Transcription, RNA processing and degradation             |
| PA3843               | hypothetical protein                                 | Hypothetical, unclassified, unknown                       |
| PA4135               | probable transcriptional regulator                   | Transcriptional regulators                                |
| PA4581               | transcriptional regulator RtcR                       | Transcriptional regulators                                |
| PA5483               | two-component response regulator AlgB                | Transcriptional regulators                                |
| PA5484               | probable two-component sensor                        | Two-component regulatory systems                          |

| ORF             | Product name                                                                  | Function class                                            |
|-----------------|-------------------------------------------------------------------------------|-----------------------------------------------------------|
| <b>Biofilms</b> |                                                                               |                                                           |
| PA0026          | phospholipase C, PlcB                                                         | Hypothetical, unclassified, unknown                       |
| PA0027          | hypothetical protein                                                          | Hypothetical, unclassified, unknown                       |
| PA0028          | hypothetical protein                                                          | Hypothetical, unclassified, unknown                       |
| PA0038          | hypothetical protein                                                          | Hypothetical, unclassified, unknown                       |
| PA0040          | conserved hypothetical protein                                                | Hypothetical, unclassified, unknown                       |
| PA0046          | hypothetical protein                                                          | Hypothetical, unclassified, unknown                       |
| PA0047          | hypothetical protein                                                          | Hypothetical, unclassified, unknown                       |
| PA0061          | hypothetical protein                                                          | Hypothetical, unclassified, unknown                       |
| PA0062          | hypothetical protein                                                          | Hypothetical, unclassified, unknown                       |
| PA0074          | serine/threonine protein kinase PpkA                                          | Adaptation, Protection                                    |
| PA0075          | probable phosphoprotein phosphatase                                           | Putative enzymes                                          |
| PA0076          | hypothetical protein                                                          | Hypothetical, unclassified, unknown                       |
| PA0083          | conserved hypothetical protein                                                | Hypothetical, unclassified, unknown                       |
| PA0086          | hypothetical protein                                                          | Hypothetical, unclassified, unknown                       |
| PA0087          | hypothetical protein                                                          | Hypothetical, unclassified, unknown                       |
| PA0088          | hypothetical protein                                                          | Hypothetical, unclassified, unknown                       |
| PA0089          | hypothetical protein                                                          | Hypothetical, unclassified, unknown                       |
| PA0090          | probable ClpA/B-type chaperone                                                | Translation, post-translational modification, degradation |
| PA0091          | conserved hypothetical protein                                                | Hypothetical, unclassified, unknown                       |
| PA0092          | hypothetical protein                                                          | Hypothetical, unclassified, unknown                       |
| PA0094          | hypothetical protein                                                          | Hypothetical, unclassified, unknown                       |
| PA0102          | probable carbonic anhydrase                                                   | Central intermediary metabolism                           |
| PA0126          | hypothetical protein                                                          | Hypothetical, unclassified, unknown                       |
| PA0134          | probable guanine deaminase                                                    | Nucleotide biosynthesis and metabolism                    |
| PA0170          | hypothetical protein                                                          | Hypothetical, unclassified, unknown                       |
| PA0224          | probable aldolase                                                             | Putative enzymes                                          |
| PA0237          | probable oxidoreductase                                                       | Putative enzymes                                          |
| PA0238          | hypothetical protein                                                          | Hypothetical, unclassified, unknown                       |
| PA0252          | hypothetical protein                                                          | Hypothetical, unclassified, unknown                       |
| PA0276          | hypothetical protein                                                          | Membrane proteins                                         |
| PA0320          | conserved hypothetical protein                                                | Hypothetical, unclassified, unknown                       |
| PA0327          | hypothetical protein                                                          | Hypothetical, unclassified, unknown                       |
| PA0346          | hypothetical protein                                                          | Hypothetical, unclassified, unknown                       |
| PA0347          | glycerophosphoryl diester phosphodiesterase, periplasmic                      | Fatty acid and phospholipid metabolism                    |
| PA0355          | protease PfpI                                                                 | Translation, post-translational modification, degradation |
| PA0376          | sigma factor RpoH                                                             | Transcriptional regulators                                |
| PA0409          | twitching motility protein PilH                                               | Two-component regulatory systems                          |
| PA0410          | twitching motility protein PilI                                               | Chemotaxis                                                |
| PA0411          | twitching motility protein PilJ                                               | Chemotaxis                                                |
| PA0413          | still frameshift probable component of chemotactic signal transduction system | Two-component regulatory systems                          |
| PA0414          | probable methyltransferase                                                    | Chemotaxis                                                |
| PA0430          | 5,10-methylenetetrahydrofolate reductase                                      | Amino acid biosynthesis and metabolism                    |
| PA0431          | hypothetical protein                                                          | Hypothetical, unclassified, unknown                       |
| PA0432          | S-adenosyl-L-homocysteine hydrolase                                           | Amino acid biosynthesis and metabolism                    |
| PA0446          | conserved hypothetical protein                                                | Hypothetical, unclassified, unknown                       |
| PA0451          | conserved hypothetical protein                                                | Membrane proteins                                         |
| PA0452          | probable stomatin-like protein                                                | Membrane proteins                                         |
| PA0462          | hypothetical protein                                                          | Hypothetical, unclassified, unknown                       |
| PA0464          | two-component sensor CreC                                                     | Two-component regulatory systems                          |
| PA0465          | inner membrane protein CreD                                                   | Membrane proteins                                         |
| PA0466          | hypothetical protein                                                          | Hypothetical, unclassified, unknown                       |
| PA0490          | hypothetical protein                                                          | Hypothetical, unclassified, unknown                       |
| PA0515          | probable transcriptional regulator                                            | Biosynthesis of cofactors, prosthetic groups and carriers |
| PA0516          | heme d1 biosynthesis protein NirF                                             | Energy metabolism                                         |
| PA0523          | nitric-oxide reductase subunit C                                              | Energy metabolism                                         |
| PA0526          | hypothetical protein                                                          | Hypothetical, unclassified, unknown                       |
| PA0529          | conserved hypothetical protein                                                | Hypothetical, unclassified, unknown                       |
| PA0530          | probable class III pyridoxal phosphate-dependent aminotransferase             | Putative enzymes                                          |
| PA0531          | probable glutamine amidotransferase                                           | Putative enzymes                                          |
| PA0543          | hypothetical protein                                                          | Hypothetical, unclassified, unknown                       |
| PA0547          | probable transcriptional regulator                                            | Transcriptional regulators                                |
| PA0557          | hypothetical protein                                                          | Hypothetical, unclassified, unknown                       |
| PA0585          | hypothetical protein                                                          | Hypothetical, unclassified, unknown                       |
| PA0588          | conserved hypothetical protein                                                | Hypothetical, unclassified, unknown                       |
| PA0601          | probable two-component response regulator                                     | Transcriptional regulators                                |

| ORF    | Product name                                                                   | Function class                                            |
|--------|--------------------------------------------------------------------------------|-----------------------------------------------------------|
| PA0603 | probable ATP-binding component of ABC transporter                              | Transport of small molecules                              |
| PA0674 | hypothetical protein                                                           | Hypothetical, unclassified, unknown                       |
| PA0675 | probable sigma-70 factor, ECF subfamily                                        | Transcriptional regulators                                |
| PA0676 | probable transmembrane sensor                                                  | Membrane proteins                                         |
| PA0693 | transport protein ExbB2                                                        | Membrane proteins                                         |
| PA0696 | hypothetical protein                                                           | Hypothetical, unclassified, unknown                       |
| PA0697 | hypothetical protein                                                           | Hypothetical, unclassified, unknown                       |
| PA0698 | hypothetical protein                                                           | Hypothetical, unclassified, unknown                       |
| PA0699 | probable peptidyl-prolyl cis-trans isomerase, PpiC-type                        | Translation, post-translational modification, degradation |
| PA0707 | transcriptional regulator ToxR                                                 | Transcriptional regulators                                |
| PA0732 | hypothetical protein                                                           | Hypothetical, unclassified, unknown                       |
| PA0737 | hypothetical protein                                                           | Hypothetical, unclassified, unknown                       |
| PA0738 | conserved hypothetical protein                                                 | Membrane proteins                                         |
| PA0752 | conserved hypothetical protein                                                 | Membrane proteins                                         |
| PA0753 | hypothetical protein                                                           | Membrane proteins                                         |
| PA0755 | cis-aconitate porin OpdH                                                       | Membrane proteins                                         |
| PA0765 | positive regulator for alginate biosynthesis MucC                              | Transcriptional regulators                                |
| PA0788 | hypothetical protein                                                           | Hypothetical, unclassified, unknown                       |
| PA0842 | probable glycosyl transferase                                                  | Putative enzymes                                          |
| PA0853 | probable oxidoreductase                                                        | Putative enzymes                                          |
| PA0877 | probable transcriptional regulator                                             | Transcriptional regulators                                |
| PA0878 | hypothetical protein                                                           | Hypothetical, unclassified, unknown                       |
| PA0879 | probable acyl-CoA dehydrogenase                                                | Putative enzymes                                          |
| PA0880 | probable ring-cleaving dioxygenase                                             | Putative enzymes                                          |
| PA0882 | hypothetical protein                                                           | Putative enzymes                                          |
| PA0884 | probable C4-dicarboxylate-binding periplasmic protein                          | Transport of small molecules                              |
| PA0886 | probable C4-dicarboxylate transporter                                          | Transport of small molecules                              |
| PA0921 | hypothetical protein                                                           | Membrane proteins                                         |
| PA0952 | hypothetical protein                                                           | Hypothetical, unclassified, unknown                       |
| PA0985 | pyocin S5                                                                      | Membrane proteins                                         |
| PA1029 | hypothetical protein                                                           | Hypothetical, unclassified, unknown                       |
| PA1065 | conserved hypothetical protein                                                 | Hypothetical, unclassified, unknown                       |
| PA1066 | probable short-chain dehydrogenase                                             | Putative enzymes                                          |
| PA1078 | flagellar basal-body rod protein FlgC                                          | Cell wall / LPS / capsule                                 |
| PA1079 | flagellar basal-body rod modification protein FlgD                             | Cell wall / LPS / capsule                                 |
| PA1080 | flagellar hook protein FlgE                                                    | Cell wall / LPS / capsule                                 |
| PA1081 | flagellar basal-body rod protein FlgF                                          | Cell wall / LPS / capsule                                 |
| PA1084 | flagellar P-ring protein precursor FlgI                                        | Cell wall / LPS / capsule                                 |
| PA1111 | hypothetical protein                                                           | Hypothetical, unclassified, unknown                       |
| PA1114 | hypothetical protein                                                           | Hypothetical, unclassified, unknown                       |
| PA1115 | hypothetical protein                                                           | Membrane proteins                                         |
| PA1118 | hypothetical protein                                                           | Membrane proteins                                         |
| PA1155 | NrdB, tyrosyl radical-harboring component of class Ia ribonucleotide reductase | Nucleotide biosynthesis and metabolism                    |
| PA1168 | hypothetical protein                                                           | Hypothetical, unclassified, unknown                       |
| PA1178 | PhoP/Q and low Mg <sup>2+</sup> inducible outer membrane protein H1 precursor  | Membrane proteins                                         |
| PA1195 | hypothetical protein                                                           | Hypothetical, unclassified, unknown                       |
| PA1216 | hypothetical protein                                                           | Hypothetical, unclassified, unknown                       |
| PA1217 | probable 2-isopropylmalate synthase                                            | Amino acid biosynthesis and metabolism                    |
| PA1247 | alkaline protease secretion protein AprE                                       | Secreted Factors (toxins, enzymes, alginate)              |
| PA1285 | probable transcriptional regulator                                             | Transcriptional regulators                                |
| PA1333 | hypothetical protein                                                           | Hypothetical, unclassified, unknown                       |
| PA1345 | hypothetical protein                                                           | Hypothetical, unclassified, unknown                       |
| PA1404 | hypothetical protein                                                           | Hypothetical, unclassified, unknown                       |
| PA1470 | probable short-chain dehydrogenase                                             | Putative enzymes                                          |
| PA1471 | hypothetical protein                                                           | Hypothetical, unclassified, unknown                       |
| PA1514 | conserved hypothetical protein                                                 | Hypothetical, unclassified, unknown                       |
| PA1517 | conserved hypothetical protein                                                 | Hypothetical, unclassified, unknown                       |
| PA1518 | conserved hypothetical protein                                                 | Hypothetical, unclassified, unknown                       |
| PA1523 | xanthine dehydrogenase                                                         | Nucleotide biosynthesis and metabolism                    |
| PA1524 | xanthine dehydrogenase                                                         | Nucleotide biosynthesis and metabolism                    |
| PA1560 | hypothetical protein                                                           | Hypothetical, unclassified, unknown                       |
| PA1600 | probable cytochrome c                                                          | Energy metabolism                                         |
| PA1601 | probable aldehyde dehydrogenase                                                | Putative enzymes                                          |
| PA1602 | probable oxidoreductase                                                        | Carbon compound catabolism                                |
| PA1603 | probable transcriptional regulator                                             | Transcriptional regulators                                |
| PA1606 | hypothetical protein                                                           | Hypothetical, unclassified, unknown                       |
| PA1625 | conserved hypothetical protein                                                 | Membrane proteins                                         |
| PA1659 | hypothetical protein                                                           | Hypothetical, unclassified, unknown                       |

| ORF    | Product name                                                | Function class                                            |
|--------|-------------------------------------------------------------|-----------------------------------------------------------|
| PA1730 | conserved hypothetical protein                              | Hypothetical, unclassified, unknown                       |
| PA1780 | assimilatory nitrite reductase small subunit                | Central intermediary metabolism                           |
| PA1786 | conserved hypothetical protein                              | Hypothetical, unclassified, unknown                       |
| PA1791 | hypothetical protein                                        | Hypothetical, unclassified, unknown                       |
| PA1847 | conserved hypothetical protein                              | Hypothetical, unclassified, unknown                       |
| PA1870 | hypothetical protein                                        | Hypothetical, unclassified, unknown                       |
| PA1889 | hypothetical protein                                        | Hypothetical, unclassified, unknown                       |
| PA1931 | probable ferredoxin                                         | Energy metabolism                                         |
| PA1932 | probable hydroxylase molybdopterin-containing subunit       | Carbon compound catabolism                                |
| PA1933 | probable hydroxylase large subunit                          | Carbon compound catabolism                                |
| PA2017 | hypothetical protein                                        | Hypothetical, unclassified, unknown                       |
| PA2021 | hypothetical protein                                        | Hypothetical, unclassified, unknown                       |
| PA2022 | probable nucleotide sugar dehydrogenase                     | Putative enzymes                                          |
| PA2024 | probable ring-cleaving dioxygenase                          | Putative enzymes                                          |
| PA2042 | probable transporter (membrane subunit)                     | Transport of small molecules                              |
| PA2071 | elongation factor G                                         | Translation, post-translational modification, degradation |
| PA2076 | probable transcriptional regulator                          | Transcriptional regulators                                |
| PA2107 | hypothetical protein                                        | Hypothetical, unclassified, unknown                       |
| PA2136 | hypothetical protein                                        | Hypothetical, unclassified, unknown                       |
| PA2140 | probable metallothionein                                    | Central intermediary metabolism                           |
| PA2149 | hypothetical protein                                        | Hypothetical, unclassified, unknown                       |
| PA2155 | probable phospholipase                                      | Putative enzymes                                          |
| PA2167 | hypothetical protein                                        | Hypothetical, unclassified, unknown                       |
| PA2168 | hypothetical protein                                        | Hypothetical, unclassified, unknown                       |
| PA2170 | hypothetical protein                                        | Hypothetical, unclassified, unknown                       |
| PA2174 | hypothetical protein                                        | Hypothetical, unclassified, unknown                       |
| PA2175 | hypothetical protein                                        | Hypothetical, unclassified, unknown                       |
| PA2176 | hypothetical protein                                        | Hypothetical, unclassified, unknown                       |
| PA2178 | hypothetical protein                                        | Hypothetical, unclassified, unknown                       |
| PA2179 | hypothetical protein                                        | Hypothetical, unclassified, unknown                       |
| PA2181 | hypothetical protein                                        | Hypothetical, unclassified, unknown                       |
| PA2186 | hypothetical protein                                        | Hypothetical, unclassified, unknown                       |
| PA2188 | probable alcohol dehydrogenase (Zn-dependent)               | Putative enzymes                                          |
| PA2243 | hypothetical protein                                        | Hypothetical, unclassified, unknown                       |
| PA2365 | conserved hypothetical protein                              | Hypothetical, unclassified, unknown                       |
| PA2366 | conserved hypothetical protein                              | Hypothetical, unclassified, unknown                       |
| PA2367 | hypothetical protein                                        | Hypothetical, unclassified, unknown                       |
| PA2369 | hypothetical protein                                        | Membrane proteins                                         |
| PA2441 | hypothetical protein                                        | Hypothetical, unclassified, unknown                       |
| PA2444 | serine hydroxymethyltransferase                             | Amino acid biosynthesis and metabolism                    |
| PA2445 | glycine cleavage system protein P2                          | Central intermediary metabolism                           |
| PA2446 | glycine cleavage system protein H2                          | Amino acid biosynthesis and metabolism                    |
| PA2459 | hypothetical protein                                        | Hypothetical, unclassified, unknown                       |
| PA2462 | hypothetical protein                                        | Hypothetical, unclassified, unknown                       |
| PA2485 | hypothetical protein                                        | Hypothetical, unclassified, unknown                       |
| PA2486 | hypothetical protein                                        | Hypothetical, unclassified, unknown                       |
| PA2491 | probable oxidoreductase                                     | Putative enzymes                                          |
| PA2493 | RND multidrug efflux membrane fusion protein MexE precursor | Transport of small molecules                              |
| PA2494 | RND multidrug efflux transporter MexF                       | Transport of small molecules                              |
| PA2495 | Multidrug efflux outer membrane protein OprN precursor      | Membrane proteins                                         |
| PA2533 | probable sodium:alanine symporter                           | Membrane proteins                                         |
| PA2536 | probable phosphatidate cytidyllyltransferase                | Fatty acid and phospholipid metabolism                    |
| PA2562 | hypothetical protein                                        | Hypothetical, unclassified, unknown                       |
| PA2569 | hypothetical protein                                        | Hypothetical, unclassified, unknown                       |
| PA2618 | hypothetical protein                                        | Translation, post-translational modification, degradation |
| PA2635 | hypothetical protein                                        | Hypothetical, unclassified, unknown                       |
| PA2658 | hypothetical protein                                        | Hypothetical, unclassified, unknown                       |
| PA2659 | hypothetical protein                                        | Hypothetical, unclassified, unknown                       |
| PA2708 | hypothetical protein                                        | Hypothetical, unclassified, unknown                       |
| PA2718 | probable transcriptional regulator                          | Transcriptional regulators                                |
| PA2761 | hypothetical protein                                        | Membrane proteins                                         |
| PA2777 | conserved hypothetical protein                              | Membrane proteins                                         |
| PA2782 | hypothetical protein                                        | Hypothetical, unclassified, unknown                       |
| PA2799 | hypothetical protein                                        | Hypothetical, unclassified, unknown                       |
| PA2803 | hypothetical protein                                        | Hypothetical, unclassified, unknown                       |
| PA2804 | hypothetical protein                                        | Hypothetical, unclassified, unknown                       |
| PA2815 | probable acyl-CoA dehydrogenase                             | Putative enzymes                                          |
| PA2816 | hypothetical protein                                        | Hypothetical, unclassified, unknown                       |

| ORF    | Product name                                                                  | Function class                                            |
|--------|-------------------------------------------------------------------------------|-----------------------------------------------------------|
| PA2827 | conserved hypothetical protein                                                | Hypothetical, unclassified, unknown                       |
| PA2880 | hypothetical protein                                                          | Hypothetical, unclassified, unknown                       |
| PA2881 | probable two-component response regulator                                     | Transcriptional regulators                                |
| PA2882 | probable two-component sensor                                                 | Two-component regulatory systems                          |
| PA2883 | hypothetical protein                                                          | Hypothetical, unclassified, unknown                       |
| PA2895 | hypothetical protein                                                          | Hypothetical, unclassified, unknown                       |
| PA2931 | probable transcriptional regulator                                            | Transcriptional regulators                                |
| PA2939 | probable aminopeptidase                                                       | Secreted Factors (toxins, enzymes, alginate)              |
| PA2969 | fatty acid biosynthesis protein PlsX                                          | Fatty acid and phospholipid metabolism                    |
| PA2970 | 50S ribosomal protein L32                                                     | Translation, post-translational modification, degradation |
| PA3023 | conserved hypothetical protein                                                | Hypothetical, unclassified, unknown                       |
| PA3031 | hypothetical protein                                                          | Hypothetical, unclassified, unknown                       |
| PA3079 | hypothetical protein                                                          | Membrane proteins                                         |
| PA3082 | glycine betaine transmethylase                                                | Amino acid biosynthesis and metabolism                    |
| PA3105 | general secretion pathway protein D                                           | Protein secretion/export apparatus                        |
| PA3121 | 3-isopropylmalate dehydratase large subunit                                   | Amino acid biosynthesis and metabolism                    |
| PA3205 | hypothetical protein                                                          | Hypothetical, unclassified, unknown                       |
| PA3218 | hypothetical protein                                                          | Hypothetical, unclassified, unknown                       |
| PA3219 | hypothetical protein                                                          | Hypothetical, unclassified, unknown                       |
| PA3221 | CsaA protein                                                                  | Protein secretion/export apparatus                        |
| PA3229 | hypothetical protein                                                          | Hypothetical, unclassified, unknown                       |
| PA3249 | probable transcriptional regulator                                            | Transcriptional regulators                                |
| PA3273 | hypothetical protein                                                          | Hypothetical, unclassified, unknown                       |
| PA3274 | hypothetical protein                                                          | Hypothetical, unclassified, unknown                       |
| PA3280 | Pyrophosphate-specific outer membrane porin OprO precursor                    | Transport of small molecules                              |
| PA3296 | alkaline phosphatase                                                          | Central intermediary metabolism                           |
| PA3309 | conserved hypothetical protein                                                | Hypothetical, unclassified, unknown                       |
| PA3319 | non-hemolytic phospholipase C precursor                                       | Secreted Factors (toxins, enzymes, alginate)              |
| PA3326 | probable Clp-family ATP-dependent protease                                    | Translation, post-translational modification, degradation |
| PA3327 | probable non-ribosomal peptide synthetase                                     | Adaptation, Protection                                    |
| PA3329 | hypothetical protein                                                          | Hypothetical, unclassified, unknown                       |
| PA3330 | probable short chain dehydrogenase                                            | Putative enzymes                                          |
| PA3331 | cytochrome P450                                                               | Adaptation, Protection                                    |
| PA3332 | conserved hypothetical protein                                                | Hypothetical, unclassified, unknown                       |
| PA3333 | 3-oxoacyl-[acyl-carrier-protein] synthase III                                 | Fatty acid and phospholipid metabolism                    |
| PA3334 | probable acyl carrier protein                                                 | Fatty acid and phospholipid metabolism                    |
| PA3335 | hypothetical protein                                                          | Hypothetical, unclassified, unknown                       |
| PA3336 | probable major facilitator superfamily (MFS) transporter                      | Membrane proteins                                         |
| PA3337 | ADP-L-glycero-D-mannoheptose 6-epimerase                                      | Cell wall / LPS / capsule                                 |
| PA3368 | probable acetyltransferase                                                    | Putative enzymes                                          |
| PA3376 | probable ATP-binding component of ABC transporter                             | Transport of small molecules                              |
| PA3377 | conserved hypothetical protein                                                | Transport of small molecules                              |
| PA3380 | conserved hypothetical protein                                                | Transport of small molecules                              |
| PA3381 | probable transcriptional regulator                                            | Transcriptional regulators                                |
| PA3382 | phosphonate transport protein PhnE                                            | Membrane proteins                                         |
| PA3383 | binding protein component of ABC phosphonate transporter                      | Transport of small molecules                              |
| PA3384 | ATP-binding component of ABC phosphonate transporter                          | Transport of small molecules                              |
| PA3389 | probable ring-cleaving dioxygenase                                            | Putative enzymes                                          |
| PA3397 | ferredoxin--NADP+ reductase                                                   | Biosynthesis of cofactors, prosthetic groups and carriers |
| PA3431 | conserved hypothetical protein                                                | Membrane proteins                                         |
| PA3432 | hypothetical protein                                                          | Membrane proteins                                         |
| PA3436 | hypothetical protein                                                          | Hypothetical, unclassified, unknown                       |
| PA3476 | autoinducer synthesis protein RhII                                            | Adaptation, Protection                                    |
| PA3478 | rhamnosyltransferase chain B                                                  | Secreted Factors (toxins, enzymes, alginate)              |
| PA3484 | hypothetical protein                                                          | Hypothetical, unclassified, unknown                       |
| PA3540 | GDP-mannose 6-dehydrogenase AlgD                                              | Cell wall / LPS / capsule                                 |
| PA3541 | alginate biosynthesis protein Alg8                                            | Cell wall / LPS / capsule                                 |
| PA3542 | alginate biosynthesis protein Alg44                                           | Cell wall / LPS / capsule                                 |
| PA3543 | alginate biosynthetic protein AlgK precursor                                  | Cell wall / LPS / capsule                                 |
| PA3544 | Alginate production outer membrane protein AlgE precursor                     | Membrane proteins                                         |
| PA3545 | alginate-c5-mannuronan-epimerase AlgG                                         | Cell wall / LPS / capsule                                 |
| PA3546 | alginate biosynthesis protein AlgX                                            | Cell wall / LPS / capsule                                 |
| PA3547 | poly(beta-d-mannuronate) lyase precursor AlgL                                 | Cell wall / LPS / capsule                                 |
| PA3548 | alginate o-acetyltransferase AlgI                                             | Cell wall / LPS / capsule                                 |
| PA3549 | alginate o-acetyltransferase AlgJ                                             | Cell wall / LPS / capsule                                 |
| PA3550 | alginate o-acetyltransferase AlgF                                             | Cell wall / LPS / capsule                                 |
| PA3551 | phosphomannose isomerase / guanosine 5'-diphospho-D-mannose pyrophosphorylase | Cell wall / LPS / capsule                                 |
| PA3553 | ArnC                                                                          | Adaptation, Protection                                    |

Supplementary Table 3

| ORF    | Product name                                             | Function class                                            |
|--------|----------------------------------------------------------|-----------------------------------------------------------|
| PA3554 | ArnA                                                     | Putative enzymes                                          |
| PA3555 | ArnD                                                     | Adaptation, Protection                                    |
| PA3556 | inner membrane L-Ara4N transferase ArnT                  | Adaptation, Protection                                    |
| PA3557 | ArnE                                                     | Adaptation, Protection                                    |
| PA3559 | probable nucleotide sugar dehydrogenase                  | Putative enzymes                                          |
| PA3569 | 3-hydroxyisobutyrate dehydrogenase                       | Carbon compound catabolism                                |
| PA3577 | hypothetical protein                                     | Hypothetical, unclassified, unknown                       |
| PA3578 | conserved hypothetical protein                           | Hypothetical, unclassified, unknown                       |
| PA3598 | conserved hypothetical protein                           | Hypothetical, unclassified, unknown                       |
| PA3651 | phosphatidate cytidylyltransferase                       | Fatty acid and phospholipid metabolism                    |
| PA3655 | elongation factor Ts                                     | Translation, post-translational modification, degradation |
| PA3688 | hypothetical protein                                     | Hypothetical, unclassified, unknown                       |
| PA3692 | probable outer membrane protein precursor                | Membrane proteins                                         |
| PA3724 | elastase LasB                                            | Secreted Factors (toxins, enzymes, alginate)              |
| PA3743 | tRNA (guanine-N1)-methyltransferase                      | Transcription, RNA processing and degradation             |
| PA3744 | 16S rRNA processing protein                              | Transcription, RNA processing and degradation             |
| PA3819 | conserved hypothetical protein                           | Membrane proteins                                         |
| PA3820 | secretion protein SecF                                   | Protein secretion/export apparatus                        |
| PA3821 | secretion protein SecD                                   | Membrane proteins                                         |
| PA3840 | conserved hypothetical protein                           | Hypothetical, unclassified, unknown                       |
| PA3890 | probable permease of ABC transporter                     | Membrane proteins                                         |
| PA3905 | hypothetical protein                                     | Hypothetical, unclassified, unknown                       |
| PA3906 | hypothetical protein                                     | Hypothetical, unclassified, unknown                       |
| PA3907 | hypothetical protein                                     | Hypothetical, unclassified, unknown                       |
| PA3908 | hypothetical protein                                     | Hypothetical, unclassified, unknown                       |
| PA3909 | hypothetical protein                                     | Hypothetical, unclassified, unknown                       |
| PA3910 | hypothetical protein                                     | Hypothetical, unclassified, unknown                       |
| PA3929 | cyanide insensitive terminal oxidase                     | Energy metabolism                                         |
| PA3944 | conserved hypothetical protein                           | Hypothetical, unclassified, unknown                       |
| PA3952 | hypothetical protein                                     | Hypothetical, unclassified, unknown                       |
| PA3957 | probable short-chain dehydrogenase                       | Putative enzymes                                          |
| PA3964 | hypothetical protein                                     | Hypothetical, unclassified, unknown                       |
| PA4017 | conserved hypothetical protein                           | Hypothetical, unclassified, unknown                       |
| PA4040 | hypothetical protein                                     | Hypothetical, unclassified, unknown                       |
| PA4063 | hypothetical protein                                     | Hypothetical, unclassified, unknown                       |
| PA4110 | beta-lactamase precursor                                 | Adaptation, Protection                                    |
| PA4111 | hypothetical protein                                     | Hypothetical, unclassified, unknown                       |
| PA4112 | probable sensor/response regulator hybrid                | Two-component regulatory systems                          |
| PA4154 | conserved hypothetical protein                           | Hypothetical, unclassified, unknown                       |
| PA4155 | hypothetical protein                                     | Hypothetical, unclassified, unknown                       |
| PA4190 | probable FAD-dependent monooxygenase                     | Putative enzymes                                          |
| PA4238 | DNA-directed RNA polymerase alpha chain                  | Transcription, RNA processing and degradation             |
| PA4243 | secretion protein SecY                                   | Membrane proteins                                         |
| PA4244 | 50S ribosomal protein L15                                | Translation, post-translational modification, degradation |
| PA4246 | 30S ribosomal protein S5                                 | Translation, post-translational modification, degradation |
| PA4247 | 50S ribosomal protein L18                                | Translation, post-translational modification, degradation |
| PA4248 | 50S ribosomal protein L6                                 | Translation, post-translational modification, degradation |
| PA4255 | 50S ribosomal protein L29                                | Translation, post-translational modification, degradation |
| PA4261 | 50S ribosomal protein L23                                | Translation, post-translational modification, degradation |
| PA4262 | 50S ribosomal protein L4                                 | Translation, post-translational modification, degradation |
| PA4272 | 50S ribosomal protein L10                                | Translation, post-translational modification, degradation |
| PA4293 | two-component sensor PprA                                | Two-component regulatory systems                          |
| PA4317 | hypothetical protein                                     | Membrane proteins                                         |
| PA4344 | probable hydrolase                                       | Putative enzymes                                          |
| PA4345 | hypothetical protein                                     | Hypothetical, unclassified, unknown                       |
| PA4348 | conserved hypothetical protein                           | Hypothetical, unclassified, unknown                       |
| PA4350 | conserved hypothetical protein                           | Hypothetical, unclassified, unknown                       |
| PA4351 | probable acyltransferase                                 | Fatty acid and phospholipid metabolism                    |
| PA4354 | conserved hypothetical protein                           | Hypothetical, unclassified, unknown                       |
| PA4355 | probable major facilitator superfamily (MFS) transporter | Membrane proteins                                         |
| PA4356 | xenobiotic reductase                                     | Adaptation, Protection                                    |
| PA4357 | conserved hypothetical protein                           | Hypothetical, unclassified, unknown                       |
| PA4371 | hypothetical protein                                     | Hypothetical, unclassified, unknown                       |
| PA4407 | cell division protein FtsZ                               | Cell division                                             |
| PA4408 | cell division protein FtsA                               | Cell division                                             |
| PA4409 | cell division protein FtsQ                               | Cell division                                             |
| PA4410 | D-alanine--D-alanine ligase                              | Cell wall / LPS / capsule                                 |
| PA4411 | UDP-N-acetylmuramate--alanine ligase                     | Cell wall / LPS / capsule                                 |

Supplementary Table 3

| ORF    | Product name                                                                  | Function class                                            |
|--------|-------------------------------------------------------------------------------|-----------------------------------------------------------|
| PA4412 | UDP-N-acetylglucosamine--N-acetylmuramyl undecaprenol N-acetylglucosamine tra | Carbon compound catabolism                                |
| PA4413 | cell division protein FtsW                                                    | Cell division                                             |
| PA4414 | UDP-N-acetylmuramoylalanine--D-glutamate ligase                               | Cell wall / LPS / capsule                                 |
| PA4415 | phospho-N-acetylmuramoyl-pentapeptide-transferase                             | Cell wall / LPS / capsule                                 |
| PA4416 | UDP-N-acetylmuramoylalanyl-D-glutamyl-2, 6-diaminopimelate--D-alanyl-D-alanyl | Cell wall / LPS / capsule                                 |
| PA4419 | cell division protein FtsL                                                    | Cell division                                             |
| PA4421 | conserved hypothetical protein                                                | Hypothetical, unclassified, unknown                       |
| PA4498 | probable metallopeptidase                                                     | Translation, post-translational modification, degradation |
| PA4500 | probable binding protein component of ABC transporter                         | Transport of small molecules                              |
| PA4502 | probable binding protein component of ABC transporter                         | Transport of small molecules                              |
| PA4503 | probable permease of ABC transporter                                          | Membrane proteins                                         |
| PA4504 | probable permease of ABC transporter                                          | Membrane proteins                                         |
| PA4505 | probable ATP-binding component of ABC transporter                             | Transport of small molecules                              |
| PA4506 | probable ATP-binding component of ABC dipeptide transporter                   | Transport of small molecules                              |
| PA4507 | hypothetical protein                                                          | Membrane proteins                                         |
| PA4525 | type 4 fimbrial precursor PilA                                                | Motility & Attachment                                     |
| PA4526 | type 4 fimbrial biogenesis protein PilB                                       | Motility & Attachment                                     |
| PA4569 | octaprenyl-diphosphate synthase                                               | Energy metabolism                                         |
| PA4575 | hypothetical protein                                                          | Hypothetical, unclassified, unknown                       |
| PA4588 | glutamate dehydrogenase                                                       | Amino acid biosynthesis and metabolism                    |
| PA4589 | probable outer membrane protein precursor                                     | Membrane proteins                                         |
| PA4621 | probable oxidoreductase                                                       | Putative enzymes                                          |
| PA4623 | hypothetical protein                                                          | Hypothetical, unclassified, unknown                       |
| PA4632 | hypothetical protein                                                          | Hypothetical, unclassified, unknown                       |
| PA4657 | hypothetical protein                                                          | Hypothetical, unclassified, unknown                       |
| PA4658 | hypothetical protein                                                          | Hypothetical, unclassified, unknown                       |
| PA4671 | probable ribosomal protein L25                                                | Adaptation, Protection                                    |
| PA4674 | conserved hypothetical protein                                                | Hypothetical, unclassified, unknown                       |
| PA4691 | hypothetical protein                                                          | Hypothetical, unclassified, unknown                       |
| PA4697 | hypothetical protein                                                          | Hypothetical, unclassified, unknown                       |
| PA4713 | hypothetical protein                                                          | Hypothetical, unclassified, unknown                       |
| PA4742 | tRNA pseudouridine 55 synthase                                                | Translation, post-translational modification, degradation |
| PA4743 | ribosome-binding factor A                                                     | Translation, post-translational modification, degradation |
| PA4744 | translation initiation factor IF-2                                            | Translation, post-translational modification, degradation |
| PA4773 | hypothetical protein                                                          | Hypothetical, unclassified, unknown                       |
| PA4781 | probable two-component response regulator                                     | Transcriptional regulators                                |
| PA4782 | hypothetical protein                                                          | Hypothetical, unclassified, unknown                       |
| PA4785 | probable acyl-CoA thiolase                                                    | Putative enzymes                                          |
| PA4786 | probable short-chain dehydrogenase                                            | Putative enzymes                                          |
| PA4811 | nitrate-inducible formate dehydrogenase, beta subunit                         | Energy metabolism                                         |
| PA4813 | lipase LipC                                                                   | Fatty acid and phospholipid metabolism                    |
| PA4844 | probable chemotaxis transducer                                                | Adaptation, Protection                                    |
| PA4858 | conserved hypothetical protein                                                | Hypothetical, unclassified, unknown                       |
| PA4862 | probable ATP-binding component of ABC transporter                             | Transport of small molecules                              |
| PA4870 | conserved hypothetical protein                                                | Hypothetical, unclassified, unknown                       |
| PA4877 | hypothetical protein                                                          | Hypothetical, unclassified, unknown                       |
| PA4879 | conserved hypothetical protein                                                | Hypothetical, unclassified, unknown                       |
| PA4881 | hypothetical protein                                                          | Hypothetical, unclassified, unknown                       |
| PA4896 | probable sigma-70 factor, ECF subfamily                                       | Transcriptional regulators                                |
| PA4933 | hypothetical protein                                                          | Membrane proteins                                         |
| PA5033 | hypothetical protein                                                          | Hypothetical, unclassified, unknown                       |
| PA5040 | Type 4 fimbrial biogenesis outer membrane protein PilQ precursor              | Motility & Attachment                                     |
| PA5041 | type 4 fimbrial biogenesis protein PilP                                       | Motility & Attachment                                     |
| PA5042 | type 4 fimbrial biogenesis protein PilO                                       | Motility & Attachment                                     |
| PA5043 | type 4 fimbrial biogenesis protein PilN                                       | Motility & Attachment                                     |
| PA5044 | type 4 fimbrial biogenesis protein PilM                                       | Motility & Attachment                                     |
| PA5075 | probable permease of ABC transporter                                          | Membrane proteins                                         |
| PA5097 | probable amino acid permease                                                  | Membrane proteins                                         |
| PA5099 | probable transporter                                                          | Membrane proteins                                         |
| PA5116 | probable transcriptional regulator                                            | Transcriptional regulators                                |
| PA5124 | two-component sensor NtrB                                                     | Two-component regulatory systems                          |
| PA5125 | two-component response regulator NtrC                                         | Transcriptional regulators                                |
| PA5128 | secretion protein SecB                                                        | Protein secretion/export apparatus                        |
| PA5129 | glutaredoxin                                                                  | Energy metabolism                                         |
| PA5139 | hypothetical protein                                                          | Hypothetical, unclassified, unknown                       |
| PA5169 | probable C4-dicarboxylate transporter                                         | Membrane proteins                                         |
| PA5170 | arginine/ornithine antiporter                                                 | Membrane proteins                                         |
| PA5180 | conserved hypothetical protein                                                | Hypothetical, unclassified, unknown                       |

Supplementary Table 3

| ORF    | Product name                                            | Function class                               |
|--------|---------------------------------------------------------|----------------------------------------------|
| PA5182 | hypothetical protein                                    | Membrane proteins                            |
| PA5183 | hypothetical protein                                    | Membrane proteins                            |
| PA5192 | phosphoenolpyruvate carboxykinase                       | Carbon compound catabolism                   |
| PA5202 | hypothetical protein                                    | Hypothetical, unclassified, unknown          |
| PA5209 | hypothetical protein                                    | Hypothetical, unclassified, unknown          |
| PA5212 | hypothetical protein                                    | Hypothetical, unclassified, unknown          |
| PA5220 | hypothetical protein                                    | Hypothetical, unclassified, unknown          |
| PA5232 | conserved hypothetical protein                          | Hypothetical, unclassified, unknown          |
| PA5262 | alginate biosynthesis protein AlgZ/FimS                 | Secreted Factors (toxins, enzymes, alginate) |
| PA5275 | conserved hypothetical protein                          | Hypothetical, unclassified, unknown          |
| PA5287 | ammonium transporter AmtB                               | Membrane proteins                            |
| PA5299 | hypothetical protein                                    | Hypothetical, unclassified, unknown          |
| PA5322 | phosphomannomutase AlgC                                 | Cell wall / LPS / capsule                    |
| PA5360 | two-component response regulator PhoB                   | Transcriptional regulators                   |
| PA5361 | two-component sensor PhoR                               | Two-component regulatory systems             |
| PA5366 | ATP-binding component of ABC phosphate transporter      | Membrane proteins                            |
| PA5367 | membrane protein component of ABC phosphate transporter | Membrane proteins                            |
| PA5368 | membrane protein component of ABC phosphate transporter | Membrane proteins                            |
| PA5415 | serine hydroxymethyltransferase                         | Amino acid biosynthesis and metabolism       |
| PA5422 | hypothetical protein                                    | Hypothetical, unclassified, unknown          |
| PA5441 | hypothetical protein                                    | Hypothetical, unclassified, unknown          |
| PA5460 | hypothetical protein                                    | Hypothetical, unclassified, unknown          |
| PA5473 | conserved hypothetical protein                          | Membrane proteins                            |
| PA5475 | hypothetical protein                                    | Hypothetical, unclassified, unknown          |
| PA5476 | citrate transporter                                     | Membrane proteins                            |
| PA5498 | probable adhesin                                        | Motility & Attachment                        |
| PA5499 | transcriptional regulator np20                          | Transcriptional regulators                   |
| PA5524 | probable short-chain dehydrogenase                      | Putative enzymes                             |
| PA5525 | probable transcriptional regulator                      | Transcriptional regulators                   |
| PA5526 | hypothetical protein                                    | Hypothetical, unclassified, unknown          |
| PA5549 | glucosamine--fructose-6-phosphate aminotransferase      | Central intermediary metabolism              |
| PA5555 | ATP synthase gamma chain                                | Energy metabolism                            |
| PA5556 | ATP synthase alpha chain                                | Energy metabolism                            |
| PA5557 | ATP synthase delta chain                                | Energy metabolism                            |
| PA5558 | ATP synthase B chain                                    | Energy metabolism                            |
| PA5559 | atp synthase C chain                                    | Energy metabolism                            |
| PA5560 | ATP synthase A chain                                    | Energy metabolism                            |
| PA5568 | conserved hypothetical protein                          | Membrane proteins                            |



| ORF             | Product name                                                | Function class                                            |
|-----------------|-------------------------------------------------------------|-----------------------------------------------------------|
| <b>Alginate</b> |                                                             |                                                           |
| PA2867          | probable chemotaxis transducer                              | Adaptation, Protection                                    |
| PA3819          | conserved hypothetical protein                              | Membrane proteins                                         |
| PA5182          | hypothetical protein                                        | Membrane proteins                                         |
| <b>RsmA</b>     |                                                             |                                                           |
| PA0105          | cytochrome c oxidase, subunit II                            | Energy metabolism                                         |
| PA0108          | cytochrome c oxidase, subunit III                           | Energy metabolism                                         |
| PA0129          | gamma-aminobutyrate permease                                | Transport of small molecules                              |
| PA0173          | probable methyltransferase                                  | Adaptation, Protection                                    |
| PA0210          | malonate decarboxylase delta subunit                        | Carbon compound catabolism                                |
| PA0212          | malonate decarboxylase gamma subunit                        | Carbon compound catabolism                                |
| PA0235          | 4-hydroxybenzoate transporter PcaK                          | Membrane proteins                                         |
| PA0396          | twitching motility protein PilU                             | Motility & Attachment                                     |
| PA0652          | transcriptional regulator Vfr                               | Transcriptional regulators                                |
| PA0673          | hypothetical protein                                        | Hypothetical, unclassified, unknown                       |
| PA0706          | chloramphenicol acetyltransferase                           | Antibiotic resistance and susceptibility                  |
| PA0710          | lactoylglutathione lyase                                    | Central intermediary metabolism                           |
| PA0723          | coat protein B of bacteriophage Pfl1                        | Related to phage, transposon, or plasmid                  |
| PA0843          | phospholipase accessory protein PlcR precursor              | Secreted Factors (toxins, enzymes, alginate)              |
| PA0844          | hemolytic phospholipase C precursor                         | Secreted Factors (toxins, enzymes, alginate)              |
| PA0905          | RsmA, regulator of secondary metabolites                    | Translation, post-translational modification, degradation |
| PA0994          | usher CupC3                                                 | Motility & Attachment                                     |
| PA1001          | anthranilate synthase component I                           | Adaptation, Protection                                    |
| PA1092          | flagellin type B                                            | Motility & Attachment                                     |
| PA1148          | exotoxin A precursor                                        | Secreted Factors (toxins, enzymes, alginate)              |
| PA1151          | pyocin S2 immunity protein                                  | Adaptation, Protection                                    |
| PA1173          | cytochrome c-type protein NapB precursor                    | Energy metabolism                                         |
| PA1247          | alkaline protease secretion protein AprE                    | Secreted Factors (toxins, enzymes, alginate)              |
| PA1251          | probable chemotaxis transducer                              | Adaptation, Protection                                    |
| PA1338          | gamma-glutamyltranspeptidase precursor                      | Amino acid biosynthesis and metabolism                    |
| PA1393          | adenosine 5'-phosphosulfate (APS) kinase                    | Amino acid biosynthesis and metabolism                    |
| PA1409          | acetylpolyamine aminohydrolase                              | Carbon compound catabolism                                |
| PA1635          | potassium-transporting ATPase, C chain                      | Transport of small molecules                              |
| PA1695          | translocation protein in type III secretion                 | Protein secretion/export apparatus                        |
| PA1758          | para-aminobenzoate synthase component I                     | Biosynthesis of cofactors, prosthetic groups and carriers |
| PA1770          | phosphoenolpyruvate synthase                                | Energy metabolism                                         |
| PA1781          | assimilatory nitrite reductase large subunit                | Central intermediary metabolism                           |
| PA1947          | ribose transport protein RbsA                               | Transport of small molecules                              |
| PA1949          | ribose operon repressor RbsR                                | Carbon compound catabolism                                |
| PA1983          | cytochrome c550                                             | Energy metabolism                                         |
| PA2007          | maleylacetoacetate isomerase                                | Carbon compound catabolism                                |
| PA2009          | homogentisate 1,2-dioxygenase                               | Carbon compound catabolism                                |
| PA2064          | copper resistance protein B precursor                       | Adaptation, Protection                                    |
| PA2129          | chaperone CupA2                                             | Motility & Attachment                                     |
| PA2337          | transcriptional regulator MtlR                              | Transcriptional regulators                                |
| PA2493          | RND multidrug efflux membrane fusion protein MexE precursor | Transport of small molecules                              |
| PA2494          | RND multidrug efflux transporter MexF                       | Transport of small molecules                              |
| PA2495          | Multidrug efflux outer membrane protein OprN precursor      | Membrane proteins                                         |
| PA2509          | muconate cycloisomerase I                                   | Carbon compound catabolism                                |
| PA2926          | histidine transport protein HisP                            | Amino acid biosynthesis and metabolism                    |
| PA3540          | GDP-mannose 6-dehydrogenase AlgD                            | Cell wall / LPS / capsule                                 |
| PA3543          | alginate biosynthetic protein AlgK precursor                | Cell wall / LPS / capsule                                 |
| PA3544          | Alginate production outer membrane protein AlgE precursor   | Membrane proteins                                         |
| PA3549          | alginate o-acetyltransferase AlgJ                           | Cell wall / LPS / capsule                                 |
| PA3603          | diacylglycerol kinase                                       | Fatty acid and phospholipid metabolism                    |
| PA4110          | beta-lactamase precursor                                    | Adaptation, Protection                                    |
| PA4127          | 2-oxo-hept-3-ene-1,7-dioate hydratase                       | Carbon compound catabolism                                |
| PA4138          | tyrosyl-tRNA synthetase                                     | Amino acid biosynthesis and metabolism                    |
| PA4158          | ferric enterobactin transport protein FepC                  | Transport of small molecules                              |
| PA4205          | hypothetical protein                                        | Membrane proteins                                         |
| PA4210          | probable phenazine biosynthesis protein                     | Secreted Factors (toxins, enzymes, alginate)              |
| PA4307          | chemotactic transducer PctC                                 | Adaptation, Protection                                    |
| PA4310          | chemotactic transducer PctB                                 | Adaptation, Protection                                    |
| PA4356          | xenobiotic reductase                                        | Adaptation, Protection                                    |

| <b>ORF</b> | <b>Product name</b>                                      | <b>Function class</b>                                     |
|------------|----------------------------------------------------------|-----------------------------------------------------------|
| PA4522     | beta-lactamase expression regulator AmpD                 | Cell wall / LPS / capsule                                 |
| PA4527     | still frameshift type 4 fimbrial biogenesis protein PilC | Motility & Attachment                                     |
| PA4855     | phosphoribosylamine--glycine ligase                      | Nucleotide biosynthesis and metabolism                    |
| PA4953     | chemotaxis protein MotB                                  | Membrane proteins                                         |
| PA4954     | chemotaxis protein MotA                                  | Adaptation, Protection                                    |
| PA5041     | type 4 fimbrial biogenesis protein PilP                  | Motility & Attachment                                     |
| PA5042     | type 4 fimbrial biogenesis protein PilO                  | Motility & Attachment                                     |
| PA5043     | type 4 fimbrial biogenesis protein PilN                  | Motility & Attachment                                     |
| PA5044     | type 4 fimbrial biogenesis protein PilM                  | Motility & Attachment                                     |
| PA5243     | delta-aminolevulinic acid dehydratase                    | Biosynthesis of cofactors, prosthetic groups and carriers |
| PA5355     | glycolate oxidase subunit GlcD                           | Central intermediary metabolism                           |
| PA5361     | two-component sensor PhoR                                | Two-component regulatory systems                          |
| PA5501     | permease of ABC zinc transporter ZnuB                    | Membrane proteins                                         |
